# Supplementary material for: Evidence for stratified conflicts of interest policies in research contexts: a methodological review
Source: PubMed Central journal article supplement — BMJ Open. 2022 Sep 19;12(9):e063501. doi: 10.1136/bmjopen-2022-063501 (PMC9486359; doi:10.1136/bmjopen-2022-063501), 2022-09-19
Supplement: bmjopen-2022-063501.draft_revisions.pdf [file bmjopen-2022-063501.draft_revisions.pdf]

# BMJ Open

BMJ Open is committed to open peer review. As part of this commitment we make the peer review history of every article we publish publicly available.

When an article is published we post the peer reviewers' comments and the authors' responses online. We also post the versions of the paper that were used during peer review. These are the versions that the peer review comments apply to.

The versions of the paper that follow are the versions that were submitted during the peer review process. They are not the versions of record or the final published versions. They should not be cited or distributed as the published version of this manuscript.

BMJ Open is an open access journal and the full, final, typeset and author-corrected version of record of the manuscript is available on our site with no access controls, subscription charges or pay-per-view fees (<http://bmjopen.bmj.com>).

If you have any questions on BMJ Open's open peer review process please email [info.bmjopen@bmj.com](mailto:info.bmjopen@bmj.com)

# BMJ Open

## Evidence for Stratified Conflicts of Interest Policies in Research Contexts: A Scoping Review

|                               |                                                                                                                                                                                                                                                                                                                                                                                                                                                                                                      |
|-------------------------------|------------------------------------------------------------------------------------------------------------------------------------------------------------------------------------------------------------------------------------------------------------------------------------------------------------------------------------------------------------------------------------------------------------------------------------------------------------------------------------------------------|
| Journal:                      | <i>BMJ Open</i>                                                                                                                                                                                                                                                                                                                                                                                                                                                                                      |
| Manuscript ID                 | bmjopen-2022-063501                                                                                                                                                                                                                                                                                                                                                                                                                                                                                  |
| Article Type:                 | Original research                                                                                                                                                                                                                                                                                                                                                                                                                                                                                    |
| Date Submitted by the Author: | 01-Apr-2022                                                                                                                                                                                                                                                                                                                                                                                                                                                                                          |
| Complete List of Authors:     | Graham, Scott; University of Texas at Austin, Rhetoric & Writing<br>Karnes, Martha S.; The University of Texas at Austin, Department of English<br>Jensen, Jared T.; The University of Texas at Austin<br>Sharma, Nandini; The University of Texas at Austin<br>Barbour, Joshua B.; The University of Texas at Austin<br>Majdik, Zoltan; North Dakota State University, Communication<br>Rousseau, Justin F.; The University of Texas at Austin Dell Medical School, Population Health and Neurology |
| Keywords:                     | Health policy < HEALTH SERVICES ADMINISTRATION & MANAGEMENT, MEDICAL ETHICS, STATISTICS & RESEARCH METHODS                                                                                                                                                                                                                                                                                                                                                                                           |
|                               |                                                                                                                                                                                                                                                                                                                                                                                                                                                                                                      |

SCHOLARONE™  
Manuscripts

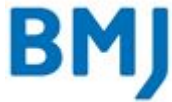

I, the Submitting Author has the right to grant and does grant on behalf of all authors of the Work (as defined in the below author licence), an exclusive licence and/or a non-exclusive licence for contributions from authors who are: i) UK Crown employees; ii) where BMJ has agreed a CC-BY licence shall apply, and/or iii) in accordance with the terms applicable for US Federal Government officers or employees acting as part of their official duties; on a worldwide, perpetual, irrevocable, royalty-free basis to BMJ Publishing Group Ltd ("BMJ") its licensees and where the relevant Journal is co-owned by BMJ to the co-owners of the Journal, to publish the Work in this journal and any other BMJ products and to exploit all rights, as set out in our [licence](#).

The Submitting Author accepts and understands that any supply made under these terms is made by BMJ to the Submitting Author unless you are acting as an employee on behalf of your employer or a postgraduate student of an affiliated institution which is paying any applicable article publishing charge ("APC") for Open Access articles. Where the Submitting Author wishes to make the Work available on an Open Access basis (and intends to pay the relevant APC), the terms of reuse of such Open Access shall be governed by a Creative Commons licence – details of these licences and which [Creative Commons](#) licence will apply to this Work are set out in our licence referred to above.

Other than as permitted in any relevant BMJ Author's Self Archiving Policies, I confirm this Work has not been accepted for publication elsewhere, is not being considered for publication elsewhere and does not duplicate material already published. I confirm all authors consent to publication of this Work and authorise the granting of this licence.

# Evidence for Stratified Conflicts of Interest Policies in Research Contexts: A Scoping Review

S. Scott Graham (0000-0003-1569-2428),<sup>1</sup> Martha S. Karnes,<sup>2</sup> Jared T. Jensen,<sup>3</sup> Nandini Sharma,<sup>4</sup> Joshua B. Barbour (0000-0001-8384-7175),<sup>5</sup> Zoltan P. Majdik (0000-0002-3851-4694),<sup>6</sup> and Justin F. Rousseau (0000-0002-2817-9124)<sup>7</sup>

1) Department of Rhetoric & Writing, Center for Health Communication, University of Texas Opioid Response Consortium, The University of Texas at Austin, Austin USA. Associate professor.

2) Department of English, The University of Texas at Austin, Austin USA. Graduate research assistant.

3) Moody College of Communication, The University of Texas at Austin, Austin USA. Graduate research assistant.

4) Moody College of Communication, The University of Texas at Austin, Austin USA. Graduate research assistant.

5) Moody College of Communication, The University of Texas at Austin, Austin USA. Associate professor.

6) Department of Communication, North Dakota State University, Fargo USA. Associate professor.

7) Departments of Population Health and Neurology, The Dell Medical School at The University of Texas at Austin, Austin USA. Assistant Professor.

Correspondence to: S Graham [ssg@utexas.edu](mailto:ssg@utexas.edu)

## Abstract

**Objectives:** The purpose of this study was to conduct a scoping review the evidentiary foundation for stratified conflicts of interest (COI) policies in research contexts.

**Design:** Scoping review.

**Search Strategy:** We searched OVID for studies published between 1986 and 2021 conducting quantitative assessments of relationships between industry funding or COI and four target outcomes. Outcomes of interest included: positive study results, evidence of methodological biases, study reporting quality, and results-conclusions concordance. To assess if the available data could support stratified COI policies in research contexts, we analyzed the independent variable and dependent variable types in each article as well as details on variable definitions, assessments, and target outcomes.

**Results:** Of the 167 articles included in this study, a substantial majority (98.2%) evaluated the effects of industry sponsorship. None of the collected articles evaluated any associations between funding magnitude and outcomes of interest. Seven studies (4.3%) stratified industry funding based on mechanism of disbursement or funder relationship to product. Thirty-four articles (19.8%) assessed the effects of author COI on target outcomes. None evaluated COI magnitude, and three studies (9.1%) stratified COI by disbursement type and/or reporting practices. Ten of the studies (6.0%) evaluated identifiable COI strata. Participation of an industry-employed author showed the most consistent effect on favorability of results across studies.

**Conclusions:** Most COI policies stratify guidelines, distinguishing between COIs based on the nature or magnitude of financial relationships, but these policies may not be well grounded in evidence. Although the overall data on the association of industry funding and author COI suggests that such policies are an important part of protecting the integrity of the biomedical research enterprise, significant evidence gaps persist with respect to support for current approaches to differentiation types and magnitudes of industry funding and COI types in research contexts.

## Background

Substantial evidence indicates that industry funding and conflicts of interest (COI) can bias research results.[1–7] Associations between industry funding or COI and positive outcomes, such as results favorable to the sponsor, are the most well studied.[2–5,7] Available evidence indicates that industry-funded trials can be up to 5.4 times more likely to return positive results,[8] and trials with author COI may be as much as 8.4 times more likely to return favorable results.[6] Additional research has demonstrated that industry funding and COI may be associated with reduced drug and device safety[6,9] and can have adverse effects on the methodological quality of clinical trials.[10–12] Recent research also suggests that industry sponsorship may be associated with premature trial termination and non-reporting of trial results.[13,14] Calls for more evidence documenting that industry funding and COI have measurable effects on biomedical research persist even though overarching relationship has been repeatedly replicated.[15]

Recognizing the risks in the well-documented relationships among funding, COI, and research outcomes, many organizations involved in biomedical research have adopted specific policies designed to address these risks. But although their existence is well-established, the efficacy of particular policies is less clear. Biomedical researchers, professional medical organizations, research funders, and government agencies have promulgated best practices for COI policies at academic medical centers (AMCs). Research evaluating these policies uses the American Medical Student Association (AMSA) scorecard of COI policies, which integrates recommendations from several professional medical organizations.[16,17] An updated AMSA scorecard has since been used to evaluate COI policies at AMCs in the United States,[17] France,[18] and Germany. [19] Similar guidelines are available from the Association of Academic Medical Centers (AAMC), the British Medical Association (BMA), professional

1  
2  
3 organizations, and researchers working in various national contexts. These policies depend on  
4 stratifying by types of COI, acknowledging that not all COI present the same degree of risk.  
5  
6

7  
8 Competing guidelines for stratified COI policy are not uniform but share many common  
9 features. In general, guidelines suggest that some types of COI should be prohibited outright,  
10 others should be subjected to specific restrictions, and some should merely require disclosure.  
11  
12 The recommendations typically advise a total prohibition on gifts from industry and  
13 ghostwriting, specific restrictions on industry-sponsored travel, and disclosure requirements for  
14 industry-funded research. Table 1 describes recommendations by the AMSA,[17] AAMC,[20]  
15 BMA,[21] and Brennen et al.[22]. Each also include recommendations for disclosure of COI  
16 beyond the specific types mentioned. The guidelines imply that all COI types should be subject  
17 to disclosure requirements.  
18  
19  
20  
21  
22  
23  
24  
25  
26  
27

28 Policies routinely make distinctions based on the method of remuneration (employment,  
29 consultancy, honoraria, fees), the nature of the funder (industry, nonprofit, government), the  
30 holder of the relationship (self, partner, family, collaborator), and the magnitude of the  
31 disbursement. They do not always agree on the severity of different COI. They may distinguish  
32 between acceptable and prohibited COI based on the monetary value of the relationship in  
33 question. Since 1995, the US Department of Health and Human Services has required AMCs and  
34 other entities that receive federal research funding to adopt policies that require disclosure of  
35 COI over a certain threshold.[23] This value was lowered from \$10,000 to \$5,000 in 2011.[24]  
36  
37 Policies also stratify COI rules by type and amount. For example, the BMA sets the declaration  
38 threshold for gifts at £500 and for equity holdings at greater than 1% of the value of the company  
39 or greater than £25,000.[21] The substantial investments in establishing differential policies  
40 involve stratifying the risk to the research enterprise based on COI type and magnitude. The goal  
41  
42  
43  
44  
45  
46  
47  
48  
49  
50  
51  
52  
53  
54  
55  
56  
57  
58  
59  
60

of this scoping review is to evaluate the extent to which available research supports these stratifications.

| COI                                                  | AMSA     | AAMC     | BMA      | Brennen et al. |
|------------------------------------------------------|----------|----------|----------|----------------|
| Attendance at unaccredited industry-sponsored events | Prohibit |          |          | Prohibit       |
| Consulting                                           | Restrict |          |          |                |
| Donations                                            |          |          | Disclose |                |
| Ghostwriting                                         | Prohibit | Prohibit |          | Prohibit       |
| Gifts                                                | Prohibit | Prohibit | Prohibit | Prohibit       |
| Grants                                               |          |          | Disclose |                |
| Industry access- device representatives              | Restrict | Restrict |          | Restrict       |
| Industry access- pharmaceutical representatives      | Prohibit | Restrict | Restrict | Prohibit       |
| Industry sponsored CME                               | Restrict | Restrict |          | Restrict       |
| Industry sponsored scholarships                      |          | Restrict |          |                |
| Meals                                                | Prohibit |          |          | Prohibit       |
| Pharmaceutical samples                               |          | Restrict |          |                |
| Research contracts                                   |          |          | Disclose |                |
| Speakers bureaus                                     | Prohibit |          |          | Prohibit       |
| Travel funds                                         |          | Restrict |          |                |
| Travel for industry sponsored meetings               |          | Prohibit |          |                |
| Travel funds for trainees                            | Prohibit |          | Prohibit | Prohibit       |
| Treatment inducements                                | Prohibit |          |          |                |

**Table 1: Illustrative Recommendations for Strata-Specific COI Policies.** This table shows AMSA,[17] AAMC,[20] BMA,[21] and Brennen et al.'s[22] recommendations for whether AMC COI policies should prohibit, restrict, or require disclosure of specific COI strata. Where entries are blank, the guidance provided no specific recommendations for that type of relationship.

## Methods

We conducted a scoping review[25] in three phases: First, we conducted a systematic search for articles that fit inclusion criteria modeled on a previous study of the effects of industry



1  
2  
3 funding and author COI on biomedical research.[2] Second, we added the more recent studies the  
4 screening strategy identified through 2021, and we collected additional data beyond the scope of  
5 the previous research on the methodological design of all included studies. Finally, we  
6 synthesized the evidence for evaluating different types of industry funding or author COI on  
7 target outcomes in biomedical research.  
8  
9  
10  
11  
12  
13  
14  
15

### 16 **Search strategy and study selection**

17  
18 The previous systematic review evaluated the overall strength of the evidence base  
19 regarding the association of industry funding and author COI with results favorable to the  
20 sponsor, risks of bias associated with the methodological design, and the quality of reporting of  
21 the concordance between results and conclusions.[2] The review assessed 75 studies published  
22 between 1986 and 2016. The search strategy was designed to identify relevant articles indexed in  
23 the Ovid database. We retrieved each of the original 75 studies, and in June 2021, we replicated  
24 that search strategy to collect additional relevant articles published since 2016. Whereas the  
25 previous review focused on evaluating overall strength of the evidence, we conducted novel  
26 analyses focused at greater level of granularity on the specific operationalization of variables.  
27  
28  
29  
30  
31  
32  
33  
34  
35  
36  
37

38 Eligible studies provided a quantitative assessment of the extent to which industry  
39 funding or author COI were associated with target outcomes of interest (positive results,  
40 methodological biases, reporting quality, and results-conclusions concordance) within research  
41 on drug and device products. All collected studies evaluated one of these outcomes on a dataset  
42 of clinical trials. Clinical trials data may come from published articles, clinical trials registries, or  
43 both. Studies of the effects of industry funding and/or COI in research areas related to smoking,  
44 nutrition, physical therapy, psychotherapy, biologics, and surgery were excluded except in cases  
45 where analyses were performed on separate identifiable drug or device data. Additionally,  
46  
47  
48  
49  
50  
51  
52  
53  
54  
55  
56  
57

1  
2  
3 studies that evaluated the effects of industry funding or COI on clinical practices, guidelines  
4  
5 development, patient organizations, and regulatory policy were excluded.  
6

7  
8 Three evaluators screened titles and abstracts. After initial norming, a random sample of  
9  
10 255 titles and abstracts were selected by all three raters to assess reliability across screeners. A  
11  
12 sample size of 255 was chosen to achieve 90% assurance using the intraclass correlation  
13  
14 coefficient (ICC).[26] Overall agreement between the three raters was 94.9% with an ICC =  
15  
16 0.801. A secondary analysis of the random sample indicated that the abstracts for all articles  
17  
18 selected for further screening included at least one of the following terms: “funding,” “funded,”  
19  
20 “COI,” “fCOI,” “conflict,” or “sponsor,” which allowed us to develop an automated screening  
21  
22 tool based on those terms. Articles selected for full-text review passed both automated and  
23  
24 manual screening. The full article text of the remaining articles was evaluated by three raters.  
25  
26  
27  
28  
29

### 30 **Data Extraction and Synthesis**

31  
32 In an assessment of all articles selected for analysis, the investigators collected data on  
33  
34 independent variable (IV) and dependent variable (DV) types as well as details on variable  
35  
36 definitions, assessments, and target outcomes. Each funding and author COI IV was categorized  
37  
38 as “stratified,” “unstratified,” or “magnitude.” Here, “stratified,” refers to identifiable  
39  
40 subcategories such as “sponsor” or “competitor” for industry funding or “employment,”  
41  
42 “consulting,” and “travel fees” for COI. An IV would be classified as “magnitude” if it assessed  
43  
44 IVs as continuous variables, e.g. industry funding dollar amounts or number of COI per article.  
45  
46 Investigators also noted whether author COI was used as a proxy for industry funding and if IVs  
47  
48 had been dichotomized during data analysis. Each DV was also categorized according to the  
49  
50 primary domain of interest: outcome favorability, drug or device safety; quality of study design  
51  
52 or reporting; and if results were reported at all. Finally, for all articles with stratified IVs for  
53  
54  
55  
56  
57

1  
2  
3 industry funding or author COI, we identified clinical area of interest, sample size used, each  
4 assessed stratum, outcome against which the stratum was assessed, significance of the results,  
5 and any reported effect sizes for significant results. A complete description of the criteria is  
6 available in Supplemental Table 1. Our analysis focuses on the prevalence of IV subtypes and  
7 the significance or effect sizes of identifiable strata.  
8  
9  
10  
11  
12  
13  
14  
15

## 16 Patients and public involvement

17 No patients or public were involved in the study.  
18  
19  
20

## 21 Results

22 Our replication of the preexisting search strategy retrieved 3,884 unique records for  
23 articles published in 2016 and later. Automated screening removed 2,671 articles from  
24 consideration. Subsequent manual screening of titles and abstracts excluded another 926 articles.  
25 The remaining 287 articles were selected for full text review, and 92 studies were ultimately  
26 selected for inclusion. An additional 75 articles were included from the preexisting systematic  
27 review for a dataset of 167 articles (See Figure 1.)  
28  
29  
30  
31  
32  
33  
34  
35  
36  
37

### 38 Industry Funding and COI IV Types

39 Of the 167 articles included, a substantial majority (n = 164, 98.2%) evaluated the effects  
40 of industry sponsorship, and a smaller subset (n = 33, 19.8%) assessed COI (See Supplemental  
41 Table 2). Among the articles that assessed industry funding (n = 164), none evaluated  
42 associations between funding magnitude stratifications and outcomes of interest. Only seven  
43 (4.3%) stratified industry funding for analysis at all. Ten studies (6.1%) collected categorical  
44 data on industry funding but dichotomized the IV prior to analysis. Thirty-five studies (21.3%)  
45 assessed industry funding and used author employment or author COI as part of the inclusion  
46  
47  
48  
49  
50  
51  
52  
53  
54  
55  
56  
57

1  
2  
3 criteria for industry funding. Of the articles that evaluated author COI (n = 33), none evaluated  
4 COI magnitude, and only 3 studies (9.1%) stratified COI. Four studies (12.1%) collected  
5 stratified COI data but dichotomized it prior to analysis. Attention to unstratified IVs remained  
6 constant: Within each year, never more than one study assessed a stratified IV for industry  
7 funding or COI. Isolated assessments of author COI do not show up in the data until 2005  
8 (Figure 2).  
9  
10  
11  
12  
13  
14  
15  
16  
17

### 18 **Outcomes Evaluation**

19  
20 Most studies (n = 108, 64.7%) evaluated the relationship between industry funding or  
21 COI and the favorability of outcomes. Sixty-six (39.5%) evaluated methodological or reporting  
22 quality. Nineteen (11.4%) assessed reporting of results, and 15 (9.0%) evaluated drug or device  
23 safety. Attention to specific DVs appears to have changed over time. The favorability of study  
24 outcomes had long been the dominant focus of research on industry funding and COI. Quality,  
25 safety and reporting, grew increasingly prevalent (Figure 2). This finding suggests that evolving  
26 research in this area is dominated by attention to different outcomes and demonstration of similar  
27 effects across subspecialties, but not to increasing precision about which types or magnitudes of  
28 funding relationships associate with risks to biomedical research.  
29  
30  
31  
32  
33  
34  
35  
36  
37  
38  
39  
40  
41

### 42 **Industry Funding and COI Stratification**

43  
44 Most of the studies examined did not assess different types of industry funding or COI.  
45  
46 Within the 10 articles that differentiated among relationship types, evaluated strata were mostly  
47 associated with industry funding categories such as the nature of the sponsor (manufacturer vs.  
48 competitor) or the nature of the sponsorship (full study sponsorship, collaborative sponsorship,  
49 and provision of medications). Several of the studies included industry funding and author COI  
50 as different categories of a single IV. The few studies that assessed COI strata independently  
51  
52  
53  
54  
55  
56  
57

1  
2  
3 tended to evaluate disclosure practices as opposed to COI types.[27–29] However, one article  
4 assessed the differential effects of author employment vs. other author COI, but only for first and  
5 corresponding authors.[30] On the whole, few of the category-specific assessments returned  
6 significant results (See Table 2). Three of the 10 studies included assessed differences in  
7 favorable outcomes based on funder relationship to the product evaluated (e.g., manufacturer vs.  
8 competitor company).[30–32] Only one study found significant results.[31] The review of 542  
9 psychiatry studies found that a greater percentage of studies sponsored by the drug manufacturer  
10 have positive outcomes than those not sponsored by a pharmaceutical company (78% vs 48%),  
11 and that studies sponsored by a competitor had the lowest rate of favorable findings (28%).  
12 Pairwise comparisons between manufacturer-funded or competitor-funded and non-industry-  
13 funded studies were significantly different, but the study reports no effects measures. Three  
14 studies evaluated strata related to the mode of industry involvement.[33–35] These studies  
15 assessed the relationship between favorable outcomes and industry provision of medication,  
16 report of findings in an industry publication venue, and other (unspecified) industry involvement.  
17 One study found significant results, and reported that “other” industry involvement associates  
18 with favorable outcomes.[35]

19 Relationships between COI or funding disclosure practices and outcomes of interest were  
20 assessed in three studies.[27–29] These articles report on evaluations of the relationship between  
21 favorable outcomes or methodological quality and COI disclosure, lack of funding disclosure,  
22 incomplete disclosure, lack of disclosure requirements by journal, or affirmative statements of no  
23 author COI. Disclosure of COI and “full” disclosure of COI appear to be most strongly  
24 associated with results favorable to industry.[28,29] Here “full” disclosure means that all  
25 payments reported to the Open Payments Database were reflected in disclosure statements.

Assessments of these different disclosure practices returned non-significant results or noticeably smaller effect sizes. Two studies evaluated the relationship between participation of industry-employed authors and results favorable to industry.[33,34] An evaluation of 215 psychiatric studies published between 1998 and 2003 found that participation of industry authors was significantly associated with favorable outcomes.[33] Similarly, an assessment of 91 asthma product studies found that favorable outcomes were more likely for studies with industry-employed authors.[34] (See Table 2.)

| Article        | Area                | Samp. | DV Type              | Strata                                   | Sig.   | Effect Measure | Effect           |
|----------------|---------------------|-------|----------------------|------------------------------------------|--------|----------------|------------------|
| Ahmer 2005     | psychiatry          | 306   | Outcome Favorability | Industry Provided Medications            | 0.053  | -              | -                |
|                |                     |       |                      | Author is Industry Employee              | 0.01*  | OR             | 8.33 (1.64-50.0) |
| Bartels 2012   | spine research      | 51    | Outcome Favorability | Disclosed COI                            | <0.05* | OR             | 16.5 (4.7-58.1)  |
|                |                     |       |                      | Statement of No COI                      | -      | -              | -                |
|                |                     |       |                      | Disclosure Not Required by Journal       | -      | -              | -                |
| Bond 2012      | asthma              | 91    | Outcome Favorability | Industry Sponsorship                     | 0.546  | -              | -                |
|                |                     |       |                      | Industry Publication Venue               | 0.191  | -              | -                |
|                |                     |       |                      | Other Industry Involvement               | NR     | -              | -                |
|                |                     |       |                      | Author is Industry Employee              | 0.003* | RR             | 1.42 (1.10-1.82) |
| Jinapriya 2011 | latanoprost         | 44    | Outcome Favorability | Sponsorship by Parent Company            | 0.53   | -              | -                |
|                |                     |       |                      | Sponsorship by Competing Company         | 0.53   | -              | -                |
| Kelly 2006     | psychiatry          | 542   | Outcome Favorability | Sponsorship by Manufacturer              | 0.001* | -              | -                |
|                |                     |       |                      | Sponsorship by Competing Company         | 0.001* | -              | -                |
| Rattinger 2009 | Thiazolidine diones | 61    | Outcome Favorability | Sponsorship by Manufacturer              | 0.7778 | -              | -                |
|                |                     |       |                      | Sponsorship by Competing Company         | 0.037* | OR             | 0(0,0.886)       |
|                |                     |       |                      | No Funding Disclosure                    | 0.4153 | -              | -                |
|                |                     |       |                      | Corresponding Author COI                 | 0.3939 | -              | -                |
|                |                     |       |                      | Corresponding Author is Sponsor Employee | 0.5714 | -              | -                |
|                |                     |       |                      | Corresponding Author No Disclosure       | 0.4388 | -              | -                |

|                |                |     |                                            |                                          |        |                |                      |
|----------------|----------------|-----|--------------------------------------------|------------------------------------------|--------|----------------|----------------------|
|                |                |     |                                            | Corresponding Author<br>COI with sponsor | 0.049* | OR             | 4.125(1.048;19.525)  |
|                |                |     |                                            | First Author COI                         | 0.1667 | -              | -                    |
|                |                |     |                                            | First Author is<br>Sponsor Employee      | -      | -              | -                    |
|                |                |     |                                            | First Author No<br>Disclosure            | -      | -              | -                    |
|                |                |     |                                            | First Author COI with<br>sponsor         | 0.4588 | -              | -                    |
| Vlad 2007      | osteoarthritis | 15  | Outcome<br>Favorability                    | Industry Sponsorship                     | 0.05   | -              | -                    |
|                |                |     |                                            | Other Industry<br>Involvement            | 0.02*  | random effects | 0.55<br>(0.29-0.81)  |
|                |                |     |                                            | Author COI                               | 0.04*  | random effects | 0.55<br>(0.27-0.84)  |
| Cherla<br>2018 | multiple       | 590 | Outcome<br>Favorability                    | Full Disclosure                          | 0.001* | OR             | 8.65<br>(2.46-30.44) |
|                |                |     |                                            | Incomplete Industry<br>Disclosure        | 0.003* | OR             | 3.61<br>(1.53-8.51)  |
|                |                |     |                                            | Incomplete Self-<br>Disclosure (Partial) | 0.004* | OR             | 4.14<br>(1.58-10.82) |
|                |                |     |                                            | Incomplete Self-<br>Disclosure (None)    | 0.002* | OR             | 0.14<br>(0.37-1.15)  |
| Saa 2018       | probiotics     | 66  | Outcome<br>Favorability                    | Industry sponsorship                     | 0.491  | -              | -                    |
|                |                |     |                                            | Non-Disclosure of<br>Sponsorship         | 0.491  | -              | -                    |
|                |                |     | Methodologica<br>l or Reporting<br>Quality | Industry Sponsorship                     | 0.491  | -              | -                    |
|                |                |     |                                            | Non-Disclosure of<br>Sponsorship         | 0.491  | -              | -                    |

**Table 2: Industry funding and COI Strata Assessed and Associated Results.** This table describes the clinical area, methodological design (sample, DV Type, IV strata), and results of analysis presented in articles that evaluated identifiable industry funding and COI strata.

## Discussion

Given the broad recognition of the risks associated with industry funding and COI, AMCs have adopted policies designed to mitigate these risks. At the same time, academic and professional medical organizations have disseminated guidelines designed to support effective industry funding and COI policies at AMCs. Although the overall data on industry funding and COI suggests that such policies are a critically important part of protecting the integrity of biomedical research, available evidence does not support current policy stratifications. The

1  
2  
3 overwhelming majority of studies evaluated in this review do not stratify industry funding or  
4  
5 COI in their analyses. A number of studies collected data that could be used to assess differences  
6  
7 in funding relationship types, but dichotomized IVs prior to analysis. Strikingly, no studies  
8  
9 included in this review evaluated any relationship between the magnitude of industry funding or  
10  
11 author COI and target outcomes of interest. The common treatment of author COI as an  
12  
13 undifferentiated category of industry funding compromises the ability to meaningfully  
14  
15 discriminate between the potential effects of industry funding or author COI.  
16  
17  
18

19         Given the considerable investment in policies that distinguish between funding type and  
20  
21 magnitude, the shortcomings identified here are weaknesses that should be addressed. When it  
22  
23 comes to evaluation of different types or magnitudes of funding, little evidence supports these  
24  
25 policies in the contexts of biomedical research. The lack of available evidence on magnitude is  
26  
27 especially striking in the U.S. context given the regulatory emphasis on *de minimis* thresholds.  
28  
29 With respect to stratified COI policies at AMCs specifically, at present no comparative  
30  
31 evaluations of COI types provide an evidentiary foundation for the common distinctions between  
32  
33 travel and consulting fees. Nevertheless, this distinction is central in the guidance.  
34  
35  
36  
37

38         In sum, the stratification of COI in policies enacted by AMCs does not appear to be  
39  
40 governed by robust evidence or differential risk assessments. It is notable that the strictest  
41  
42 criteria tend to associate with relationships of modest economic benefit to individuals (e.g.,  
43  
44 meals and travel) whereas relationships with well-documented risks but considerable economic  
45  
46 benefit to institutions (e.g., industry grants and collaborations) are largely left out of COI policy  
47  
48 recommendations. Additionally, it is noteworthy that the strongest evidence relates to author  
49  
50 employment, although specific instructions about disclosing employment have been removed  
51  
52  
53  
54  
55  
56  
57  
58  
59  
60



1  
2  
3 from the latest ICMJE disclosure form. These findings support recent calls for greater attention  
4  
5 to institutional COI at AMCs and other institutions that conduct biomedical research.[36–39]  
6  
7

8 This study has several limitations that should inform the reading of the findings. Our  
9  
10 scoping review evaluates the methodological design and approaches to IV stratification for  
11  
12 studies of the relationships between industry funding or author COI and four specified outcomes  
13  
14 of interest in biomedical research. Although we are aware of studies that evaluate COI  
15  
16 magnitude, for example, they were not returned by our search strategy either because they treat  
17  
18 COI magnitude in the aggregate[40] or because they assess non-target outcomes such as  
19  
20 associations with commercial publishing practices.[41] Additionally, AMC guidelines are  
21  
22 designed to respond to COI risks in multiple domains including research, clinical practice, and  
23  
24 medical education. We assume that COI strata related to industry-funded CME or  
25  
26 pharmaceutical representative access to AMCs are designed primarily to address risks of bias  
27  
28 associated with medical education and clinical practice. However, the literature collected does  
29  
30 not assess clinical practice or educational domains. Additional research not covered by this  
31  
32 scoping review is available that evaluates the relationships of industry funding and COI with  
33  
34 prescription practices, guidelines development, policy decision-making, and other areas. Studies  
35  
36 in these areas may offer further insights about different risk profiles associated with types or  
37  
38 magnitudes of industry funding. AMC COI policies and related guidelines may be more  
39  
40 responsive to research in these areas.  
41  
42  
43  
44  
45  
46  
47

## 48 Conclusion

49 Current COI policies in research contexts devote considerable attention to distinguishing  
50  
51 between different types and magnitudes of COI. Although substantial evidence exists that  
52  
53 industry funding and COI in general have adverse effects on biomedical research, the current  
54  
55  
56  
57

1  
2  
3 evidence does not support the stratification by type or magnitude common to existing policy or  
4 capture why such stratification might be important. Appropriate and evidence-based COI policies  
5 are essential for safeguarding the integrity of the biomedical research enterprise. Therefore, it is  
6 critical that researchers in these areas develop standardized taxonomies of industry funding  
7 and/or author COI. These taxonomies combined with magnitudes allow for computation and  
8 aggregation of COIs essential for supporting rigorous research to guide COI policies in research  
9 contexts. Additionally, the results of this scoping review further support recent recommendations  
10 for attention to institutional COI at AMCs. Future COI policy guidelines should address  
11 institutional COI alongside individual COI. Finally, the results of this scoping review suggest  
12 that uniform COI policies designed to simultaneously address risks to clinical practice, medical  
13 education, and biomedical research may be predominantly informed by the first two domains.  
14 Additional efforts should be made to ensure that COI policies are responsive to risks associated  
15 with bias in biomedical research or AMCs should potentially consider differential policies based  
16 on institutional roles. Research should investigate the utility of separate COI policies for clinical,  
17 educational, and research staff. Of course, staff at AMCs often occupy more than one role. In  
18 such cases, it might be appropriate to require those staff to adhere to the most restrictive policy.  
19 Nonetheless, the policies should be developed based on an understanding of the differential  
20 effects of distinct strata and magnitudes of COI on outcomes across the multiple domains.  
21  
22  
23  
24  
25  
26  
27  
28  
29  
30  
31  
32  
33  
34  
35  
36  
37  
38  
39  
40  
41  
42  
43  
44  
45  
46  
47  
48  
49  
50  
51  
52  
53  
54  
55  
56  
57  
58  
59  
60

1  
2  
3 **Contributors:** SSG designed the study, coordinated the study, and is the guarantor. SSG, JBB,  
4 and JFR executed the search strategy and screened abstracts. SSG, MSK, JJ, and NS collected  
5 the data. SSG, JBB, JFR, and ZPM analyzed the data. SSG, MSK, and NS drafted the  
6 manuscript. SSG, JBB, JFR, and ZPM revised the manuscript. Guarantor: SSG.  
7

8  
9 **Funding:** This work was funded by the National Institute of General Medical Sciences of the  
10 National Institutes of Health under Award Number R01GM141476. The content is solely the  
11 responsibility of the authors and does not necessarily represent the official views of the National  
12 Institutes of Health.  
13

14  
15 **Competing Interests:** SSG has received grant support from the National Institute of General  
16 Medical Sciences of the National Institutes of Health and the National Endowment for the  
17 Humanities; compute time from the National Science Foundation's Extreme Science and  
18 Engineering Discovery Environment; and support for consulting from the Texas Health and  
19 Human Services Commission. JBB has received grant support from the National Institute of  
20 General Medical Sciences of the National Institutes of Health, The National Science Foundation,  
21 and Blue Cross Blue Shield/Health Care Service Corporation. JFR has received grant support  
22 from the National Institutes of Health (National Institute of General Medical Sciences, National  
23 Institute of Allergy and Infectious Diseases, the National Institute of Mental Health), the Health  
24 Care Cost Institute, the Texas Child Mental Health Care Consortium, and the Michael and Susan  
25 Dell Foundation. He has received support through research service agreements with Austin  
26 Public Health and the Integrated Care Collaboration. He has always received funds from  
27 National Center for Advancing Translational Sciences via the NIH Division of Loan Repayment.  
28 ZPM has received grant support from the National Institute of General Medical Sciences of the  
29 National Institutes of Health, the National Science Foundation, the Summer Institute in  
30 Computational Social Science and consulting fees from the University of Texas at Austin. MSK,  
31 JJJ, and NS have no conflicts of interest to disclose.  
32  
33  
34

35 **Data Availability:** All data relevant to the study are included in the article or uploaded as  
36 supplementary information  
37

38  
39 **Ethics Approval:** This study did not require ethics approval as it did not involve human  
40 subjects.  
41

## 42 43 44 45 46 47 48 49 50 51 52 53 54 55 56 57 58 59 60

### References

- 1 Institute of Medicine. *Conflict of Interest in Medical Research, Education, and Practice*.  
2 Washington, DC: : The National Academies Press 2009. doi:10.17226/12598
- 3 Lundh A, Lexchin J, Mintzes B, *et al*. Industry sponsorship and research outcome. *Cochrane*  
4 *Database Syst Rev* Published Online First: 2017. doi:10.1002/14651858.MR000033.pub3
- 5 Waqas A, Baig AA, Khalid MA, *et al*. Conflicts of interest and outcomes of clinical trials of  
6 antidepressants: An 18-year retrospective study. *J Psychiatr Res* 2019;**116**:83–7.  
7 doi:10.1016/j.jpsychires.2019.05.029

- 1
  - 2
  - 3
  - 4 Ahn R, Woodbridge A, Abraham A, *et al*. Financial ties of principal investigators and  
4 randomized controlled trial outcomes: cross sectional study. *BMJ* 2017;**356**:i6770.  
5 doi:10.1136/bmj.i6770  
6
  - 7
  - 8 Flacco ME, Manzoli L, Boccia S, *et al*. Head-to-head randomized trials are mostly industry  
9 sponsored and almost always favor the industry sponsor. *J Clin Epidemiol* 2015;**68**:811–20.  
10 doi:10.1016/j.jclinepi.2014.12.016  
11
  - 12
  - 13
  - 14
  - 15
  - 16
  - 17
  - 18
  - 19
  - 20
  - 21
  - 22
  - 23
  - 24
  - 25
  - 26
  - 27
  - 28
  - 29
  - 30
  - 31
  - 32
  - 33
  - 34
  - 35
  - 36
  - 37
  - 38
  - 39
  - 40
  - 41
  - 42
  - 43
  - 44
  - 45
  - 46
  - 47
  - 48
  - 49
  - 50
  - 51
  - 52
  - 53
  - 54
  - 55
  - 56
  - 57
  - 58
  - 59
  - 60
- 4 Ahn R, Woodbridge A, Abraham A, *et al*. Financial ties of principal investigators and randomized controlled trial outcomes: cross sectional study. *BMJ* 2017;**356**:i6770. doi:10.1136/bmj.i6770
- 5 Flacco ME, Manzoli L, Boccia S, *et al*. Head-to-head randomized trials are mostly industry sponsored and almost always favor the industry sponsor. *J Clin Epidemiol* 2015;**68**:811–20. doi:10.1016/j.jclinepi.2014.12.016
- 6 Perlis RH, Perlis CS, Wu Y, *et al*. Industry sponsorship and financial conflict of interest in the reporting of clinical trials in psychiatry. *Am J Psychiatry* 2005;**162**:1957–60. doi:10.1176/appi.ajp.162.10.1957
- 7 Djulbegovic B, Lacevic M, Cantor A, *et al*. The uncertainty principle and industry-sponsored research. *The Lancet* 2000;**356**:635–8. doi:10.1016/S0140-6736(00)02605-2
- 8 Als-Nielsen B, Chen W, Gluud C, *et al*. Association of Funding and Conclusions in Randomized Drug Trials: A Reflection of Treatment Effect or Adverse Events? *JAMA* 2003;**290**:921–8. doi:10.1001/jama.290.7.921
- 9 Gyawali B, Tessema FA, Jung EH, *et al*. Assessing the Justification, Funding, Success, and Survival Outcomes of Randomized Noninferiority Trials of Cancer Drugs: A Systematic Review and Pooled Analysis. *JAMA Netw Open* 2019;**2**:e199570. doi:10.1001/jamanetworkopen.2019.9570
- 10 Fraguas D, Díaz-Caneja CM, Pina-Camacho L, *et al*. Predictors of Placebo Response in Pharmacological Clinical Trials of Negative Symptoms in Schizophrenia: A Meta-regression Analysis. *Schizophr Bull* 2019;**45**:57–68. doi:10.1093/schbul/sbx192
- 11 Gao Y, Ge L, Ma X, *et al*. Improvement needed in the network geometry and inconsistency of Cochrane network meta-analyses: a cross-sectional survey. *J Clin Epidemiol* 2019;**113**:214–27. doi:10.1016/j.jclinepi.2019.05.022
- 12 Kapelios CJ, Naci H, Vardas PE, *et al*. Study design, result posting and publication of late-stage cardiovascular trials. *Eur Heart J Qual Care Clin Outcomes* 2020;:qcaa080. doi:10.1093/ehjqcco/qcaa080
- 13 Roddick AJ, Chan FTS, Stefaniak JD, *et al*. Discontinuation and non-publication of clinical trials in cardiovascular medicine. *Int J Cardiol* 2017;**244**:309–15. doi:10.1016/j.ijcard.2017.06.020
- 14 Stefaniak JD, Lam TCH, Sim NE, *et al*. Discontinuation and non-publication of neurodegenerative disease trials: a cross-sectional analysis. *Eur J Neurol* 2017;**24**:1071–6. doi:10.1111/ene.13336
- 15 Goldberg D. On Physician-Industry Relationships and Unreasonable Standards of Proof for Harm: A Population-Level Bioethics Approach. *Kennedy Inst Ethics J* 2016;**26**:173–94. doi:10.1353/ken.2016.0022

- 16 Fabbri A, Rasmussen Hone K, Hróbjartsson A, *et al.* Conflict of Interest Policies at Medical Schools and Teaching Hospitals: A Systematic Review of Cross-sectional Studies. *Int J Health Policy Manag* 2021;**0**. doi:10.34172/ijhpm.2021.12
- 17 Carlat DJ, Fagrelus T, Ramachandran R, *et al.* The updated AMSA scorecard of conflict-of-interest policies: a survey of U.S. medical schools. *BMC Med Educ* 2016;**16**:202. doi:10.1186/s12909-016-0725-y
- 18 Scheffer P, Guy-Coichard C, Outh-Gauer D, *et al.* Conflict of Interest Policies at French Medical Schools: Starting from the Bottom. *PLOS ONE* 2017;**12**:e0168258. doi:10.1371/journal.pone.0168258
- 19 Grabitz P, Friedmann Z, Gepp S, *et al.* Quantity and quality of conflict of interest policies at German medical schools: a cross-sectional study and survey. *BMJ Open* 2020;**10**:e039782. doi:10.1136/bmjopen-2020-039782
- 20 AAMC. Industry Funding of Medical Education Report of an AAMC Task Force. 2008. <https://www.aamc.org/system/files/c/2/482220-industryfundingofmedicaleducation.pdf> (accessed 27 Jan 2022).
- 21 BMA. Transparency and doctors with competing interests – guidance from the BMA. 2017. <https://www.bma.org.uk/media/1853/bma-transparency-and-doctors-with-competing-interests-apr-2017.pdf>
- 22 Brennan TA, Rothman DJ, Blank L, *et al.* Health industry practices that create conflicts of interest: a policy proposal for academic medical centers. *JAMA* 2006;**295**:429–33. doi:10.1001/jama.295.4.429
- 23 Lo B, Wolf LE, Berkeley A. Conflict-of-Interest Policies for Investigators in Clinical Trials. *N Engl J Med* 2000;**343**:1616–20. doi:10.1056/NEJM200011303432206
- 24 HHS Tightens Financial Conflict of Interest Rules for Researchers. Natl. Inst. Health NIH. 2015. <https://www.nih.gov/news-events/news-releases/hhs-tightens-financial-conflict-interest-rules-researchers> (accessed 27 Jan 2022).
- 25 Tricco AC, Lillie E, Zarin W, *et al.* PRISMA Extension for Scoping Reviews (PRISMA-ScR): Checklist and Explanation. *Ann Intern Med* 2018;**169**:467–73. doi:10.7326/M18-0850
- 26 Zou GY. Sample size formulas for estimating intraclass correlation coefficients with precision and assurance. *Stat Med* 2012;**31**:3972–81. doi:10.1002/sim.5466
- 27 Saa C, Bunout D, Hirsch S. Industry funding effect on positive results of probiotic use in the management of acute diarrhea: a systematized review. *Eur J Gastroenterol Hepatol* 2019;**31**:289–302. doi:10.1097/MEG.0000000000001322
- 28 Bartels RHMA, Delye H, Boogaarts J. Financial disclosures of authors involved in spine research: an underestimated source of bias. *Eur Spine J Off Publ Eur Spine Soc Eur Spinal Deform Soc Eur Sect Cerv Spine Res Soc* 2012;**21**:1229–33. doi:10.1007/s00586-011-2086-x

- 1  
2  
3 29 Cherla DV, Viso CP, Holihan JL, *et al.* The Effect of Financial Conflict of Interest,  
4 Disclosure Status, and Relevance on Medical Research from the United States. *J Gen Intern*  
5 *Med* 2019;**34**:429–34. doi:10.1007/s11606-018-4784-0  
6  
7  
8 30 Rattinger G, Bero L. Factors Associated with Results and Conclusions of Trials of  
9 Thiazolidinediones. *PLOS ONE* 2009;**4**:e5826. doi:10.1371/journal.pone.0005826  
10  
11 31 Kelly RE, Cohen LJ, Semple RJ, *et al.* Relationship between drug company funding and  
12 outcomes of clinical psychiatric research. *Psychol Med* 2006;**36**:1647–56.  
13 doi:10.1017/S0033291706008567  
14  
15 32 Jinapriya D, Anraku A, Alasbali T, *et al.* Evaluation of investigator bias in industry-funded  
16 clinical trials of latanoprost. *Can J Ophthalmol J Can Ophtalmol* 2011;**46**:531–6.  
17 doi:10.1016/j.jcjo.2011.09.015  
18  
19 33 Ahmer S, Arya P, Anderson D, *et al.* Conflict of interest in psychiatry. *Psychiatr Bull*  
20 2005;**29**:302–4. doi:10.1192/pb.29.8.302  
21  
22 34 Bond K, Spooner C, Tjosvold L, *et al.* The nature and influence of pharmaceutical industry  
23 involvement in asthma trials. *Can Respir J J Can Thorac Soc* 2012;**19**:267–71.  
24  
25 35 Vlad SC, LaValley MP, McAlindon TE, *et al.* Glucosamine for pain in osteoarthritis: why do  
26 trial results differ? *Arthritis Rheum* 2007;**56**:2267–77. doi:10.1002/art.22728  
27  
28 36 Slaughter S, Feldman MP, Thomas SL. U.S. Research Universities' Institutional Conflict of  
29 Interest Policies. *J Empir Res Hum Res Ethics* 2009;**4**:3–20. doi:10.1525/jer.2009.4.3.3  
30  
31 37 Rochon PA, Sekeres M, Lexchin J, *et al.* Institutional financial conflicts of interest policies  
32 at Canadian academic health science centres: a national survey. *Open Med* 2010;**4**:e134–8.  
33  
34 38 Resnik DB, Ariansen JL, Jamal J, *et al.* Institutional Conflict of Interest Policies at U.S.  
35 Academic Research Institutions. *Acad Med J Assoc Am Med Coll* 2016;**91**:242–6.  
36 doi:10.1097/ACM.0000000000000980  
37  
38 39 Nichols-Casebolt A, Macrina FL. Current Perspectives Regarding Institutional Conflict of  
39 Interest. *Sci Eng Ethics* 2019;**25**:1671–7. doi:10.1007/s11948-015-9703-8  
40  
41 40 Graham SS, Majdik ZP, Barbour JB, *et al.* Associations between aggregate NLP-extracted  
42 conflicts of interest and adverse events by drug product. *Stud Health Technol Inform*  
43  
44 41 Graham SS, Majdik ZP, Clark D, *et al.* Relationships among commercial practices and  
45 author conflicts of interest in biomedical publishing. *PLOS ONE* 2020;**15**:e0236166.  
46 doi:10.1371/journal.pone.0236166  
47  
48  
49  
50  
51  
52  
53  
54  
55  
56  
57  
58  
59  
60

1  
2  
3  
4  
5  
6  
7 **Figure 1: PRISMA-SCR Flow Diagram for Screening and Review.**

8  
9 **Figure 2: IV and DV Types By Year Number (1986-2021).** Figure includes number of studies  
10 per year by DV Type (A), number of studies by IV type for studies assessing industry funding  
11 (B) and number of studies by IV type for studies evaluating COI (C).  
12  
13  
14  
15  
16  
17  
18  
19  
20  
21  
22  
23  
24  
25  
26  
27  
28  
29  
30  
31  
32  
33  
34  
35  
36  
37  
38  
39  
40  
41  
42  
43  
44  
45  
46  
47  
48  
49  
50  
51  
52  
53  
54  
55  
56  
57

For peer review only

PRISMA 2020 flow diagram for updated systematic reviews which included searches of databases and registers only

1  
2  
3  
4  
5  
6  
7  
8  
9  
10  
11  
12  
13  
14  
15  
16  
17  
18  
19  
20  
21  
22  
23  
24  
25  
26  
27  
28  
29  
30  
31  
32  
33  
34  
35  
36  
37  
38  
39  
40  
41  
42  
43  
44  
45  
46  
47  
48  
49  
50  
51  
52  
53  
54  
55  
56  
57  
58  
59  
60

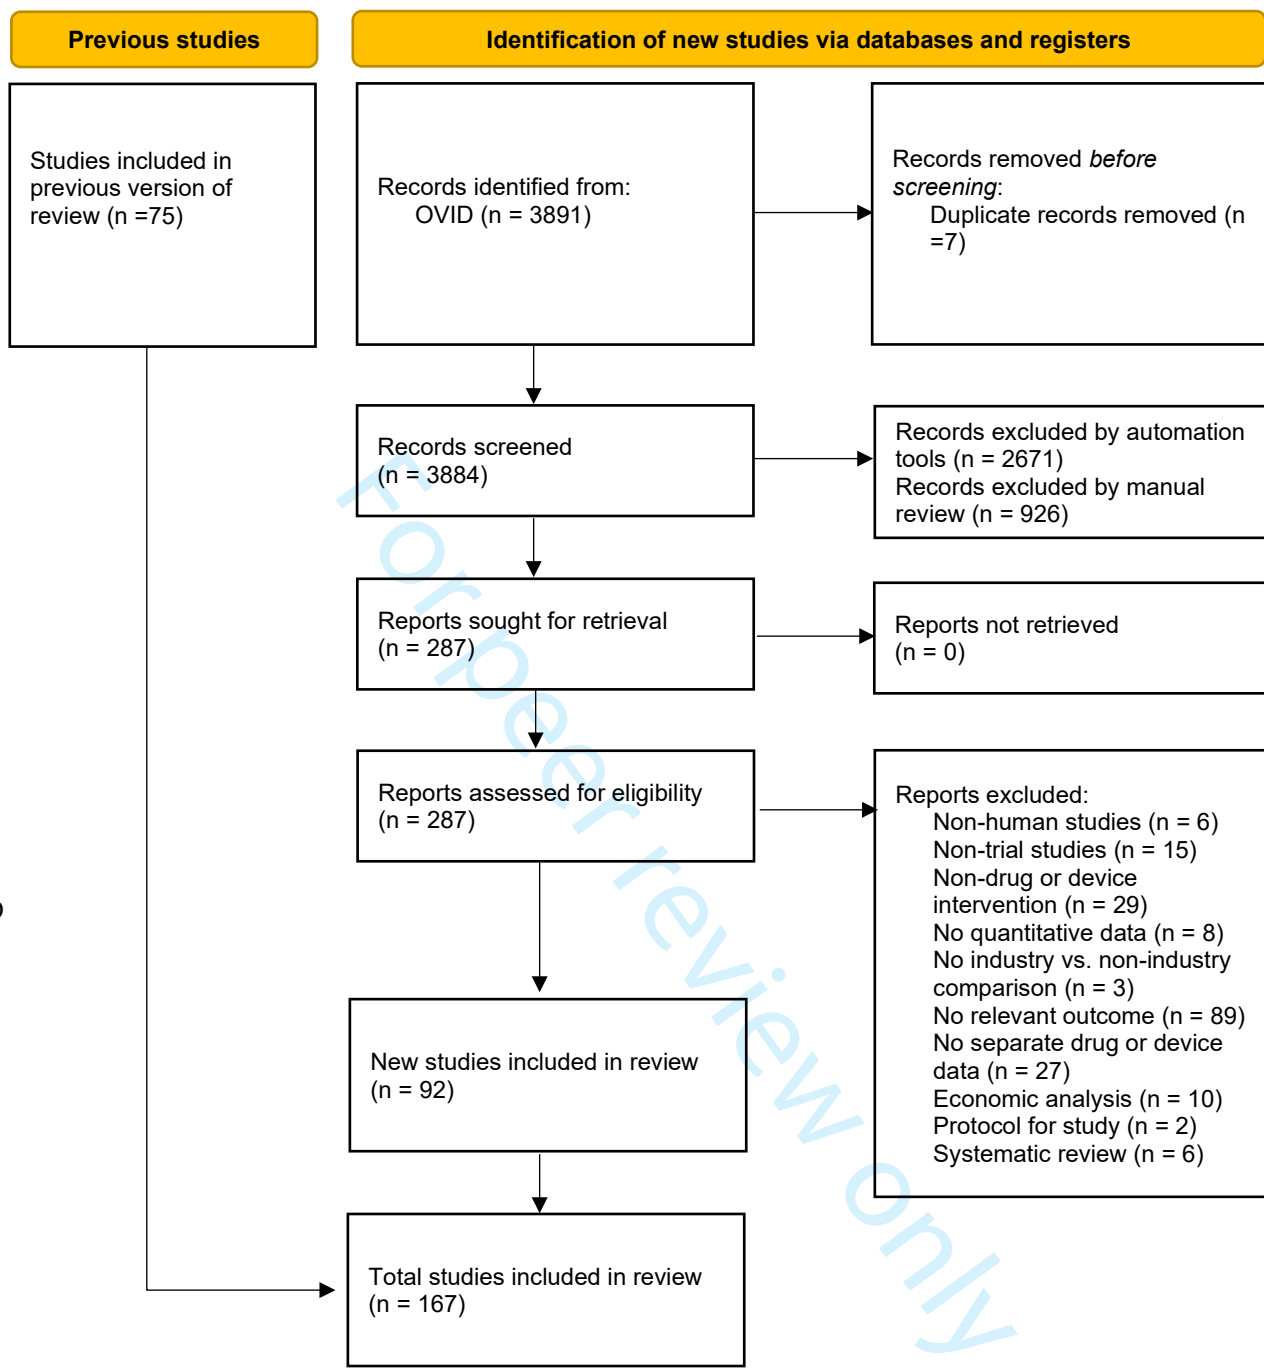



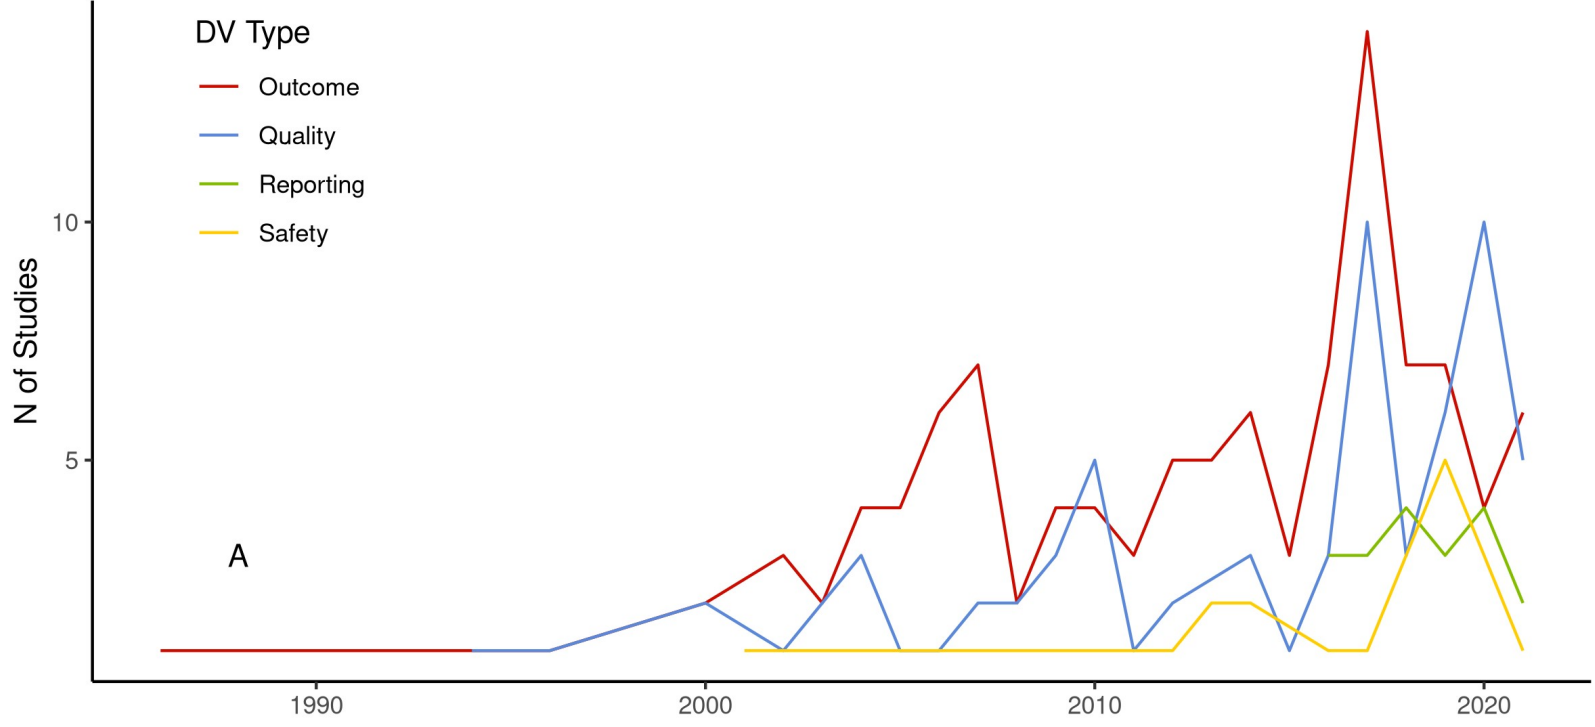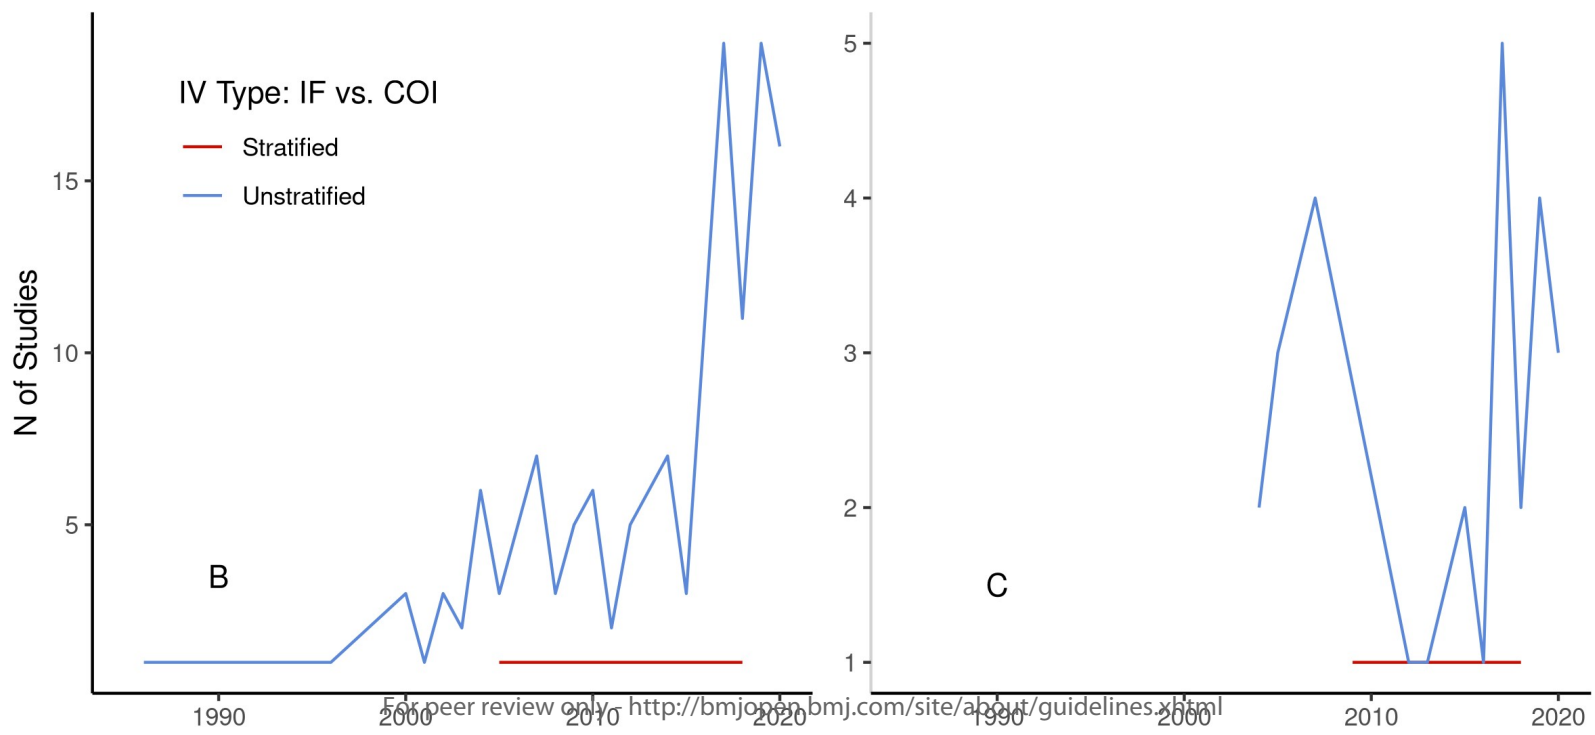

1  
2  
3  
4  
5  
6  
7  
8  
9  
10  
11  
12  
13  
14  
15  
16  
17  
18  
19  
20  
21  
22  
23  
24  
25  
26  
27  
28  
29  
30  
31  
32  
33  
34  
35  
36  
37  
38  
39  
40  
41  
42  
43  
44  
45  
46  
47

# Supplementary Online Materials

| <b>Industry Funding Independent Variable (IV) Type.</b> |                                                                                                                                                                                                                                                                                                                                                                                                                                                                                                                                           |
|---------------------------------------------------------|-------------------------------------------------------------------------------------------------------------------------------------------------------------------------------------------------------------------------------------------------------------------------------------------------------------------------------------------------------------------------------------------------------------------------------------------------------------------------------------------------------------------------------------------|
| Stratified                                              | Study provides a quantitative assessment of the relationship between different types of industry funding and one or more outcomes of interest. Industry funding may be analyzed as a categorical variable or as a series of dichotomous variables representing a range of industry funding categories. Funder stratifications may include level of involvement (primary, secondary), relationship to drug or device under study (manufacturer, competitor), or mode of sponsorship (study sponsor, medication provider, author employer). |
| Unstratified                                            | Industry funding is analyzed as a dichotomous variable or as one category in a categorical variable, e.g. funder types might include industry, government, nonprofit.                                                                                                                                                                                                                                                                                                                                                                     |
| Magnitude                                               | Industry funding is a continuous variable representing either the total number of industry funders per study or total dollar value of contributions.                                                                                                                                                                                                                                                                                                                                                                                      |
| <b>Author COI IV Type</b>                               |                                                                                                                                                                                                                                                                                                                                                                                                                                                                                                                                           |
| Stratified                                              | Study provides a quantitative assessment of the relationship between different types of COI and one or more outcomes of interest. Industry funding may be analyzed as a categorical variable or as a series of dichotomous variables representing a range of COI categories. COI stratifications may include type of disbursement (employment, speaker fees, etc) and affiliation (trial sponsor vs. non-sponsor funder).                                                                                                                 |
| Unstratified                                            | COI is analyzed as a dichotomous variable or as one category in a categorical variable, e.g., Industry funding, Author COI, Government Funding.                                                                                                                                                                                                                                                                                                                                                                                           |
| Magnitude                                               | COI is a continuous variable representing either the total number of relationships or the total dollar value of contributions.                                                                                                                                                                                                                                                                                                                                                                                                            |
| <b>COI as Proxy for Industry Funding Study</b>          |                                                                                                                                                                                                                                                                                                                                                                                                                                                                                                                                           |
| Yes                                                     | Disclosed author COI are used as inclusion criteria for industry funding.                                                                                                                                                                                                                                                                                                                                                                                                                                                                 |
| No                                                      | Disclosed COI are not used as inclusion criteria for industry funding or industry funding is not measured.                                                                                                                                                                                                                                                                                                                                                                                                                                |
| <b>IV Dichotomization</b>                               |                                                                                                                                                                                                                                                                                                                                                                                                                                                                                                                                           |
| NA                                                      | The IV used in the statistical analysis was stratified or an assessment of magnitude.                                                                                                                                                                                                                                                                                                                                                                                                                                                     |
| Yes                                                     | The categorical schema was converted to dichotomous variables that were used for analysis.                                                                                                                                                                                                                                                                                                                                                                                                                                                |
| No                                                      | The IV was consistently treated as dichotomous throughout the article.                                                                                                                                                                                                                                                                                                                                                                                                                                                                    |
| <b>Dependent Variable Type (DV Type)</b>                |                                                                                                                                                                                                                                                                                                                                                                                                                                                                                                                                           |
| Outcome                                                 | The analysis evaluates if chosen IVs are associated with results indicating the success of the intervention (drug, device, etc) or are otherwise favorable to trial sponsors. Includes drug efficacy, response rate, positive interpretation of findings, etc.                                                                                                                                                                                                                                                                            |
| Safety                                                  | The analysis evaluates if chosen IVs associate with results related to drug safety.                                                                                                                                                                                                                                                                                                                                                                                                                                                       |
| Quality                                                 | The analysis evaluates if chosen IVs are associated with results related to methodological or reporting quality. Includes issues of statistical power, risk of bias, presence of hype or spin.                                                                                                                                                                                                                                                                                                                                            |
| Reporting                                               | The analysis evaluates whether or not trial results were reported at all. May include reporting to ClinicalTrials.gov or publication of findings.                                                                                                                                                                                                                                                                                                                                                                                         |

**Supplemental Table 1. Methodological Design Feature Schema for Analyzed Studies.** Definition and details for industry funding IV type, author COI IV type, COI as proxy for industry funding, dichotomization, and DV type analyses.

1  
2  
3  
4  
5  
6  
7  
8  
9  
10  
11  
12  
13  
14  
15  
16  
17  
18  
19  
20  
21  
22  
23  
24  
25  
26  
27  
28  
29  
30  
31  
32  
33  
34  
35  
36  
37  
38  
39  
40  
41  
42  
43  
44  
45  
46  
47  
48  
49  
50  
51  
52  
53  
54  
55  
56  
57  
58  
59  
60

| <i>Article</i>                          | <i>Year</i> | <i>IF IV Type</i> | <i>COI IV Type</i> | <i>DV Type</i>        | <i>COI Proxy</i> | <i>IF Dichotomize</i> | <i>COI Dichotomize</i> |
|-----------------------------------------|-------------|-------------------|--------------------|-----------------------|------------------|-----------------------|------------------------|
| <i>Abildgaard et al. (1)</i>            | 2019        | Unstratified      | None               | Outcome               | yes              | yes                   | NA                     |
| <i>Addeo et al. (2)</i>                 | 2019        | Unstratified      | None               | Outcome,<br>Safety    | no               | no                    | NA                     |
| <i>Abmer et al. (3)</i>                 | 2005        | Stratified        | Unstratified       | Outcome               | no               | NA                    | no                     |
| <i>Abn et al. (4)</i>                   | 2016        | Unstratified      | Unstratified       | Outcome               | no               | no                    | yes                    |
| <i>Alasbali et al. (5)</i>              | 2009        | Unstratified      | None               | Outcome,<br>Quality   | no               | no                    | NA                     |
| <i>Als-Nielsen et al. (6)</i>           | 2003        | Unstratified      | None               | Outcome               | yes              | NA                    | NA                     |
| <i>Arni et al. (7)</i>                  | 2004        | Unstratified      | None               | Quality               | no               | no                    | NA                     |
| <i>Azad et al. (8)</i>                  | 2019        | Unstratified      | None               | Quality               | no               | NA                    | NA                     |
| <i>Azharuddin et al. (9)</i>            | 2020        | Unstratified      | None               | Quality               | no               | no                    | NA                     |
| <i>Barden et al. (10)</i>               | 2005        | Unstratified      | None               | Outcome               | yes              | no                    | NA                     |
| <i>Bariani et al. (11)</i>              | 2013        | Unstratified      | Unstratified       | Outcome               | no               | yes                   | yes                    |
| <i>Bartels et al. (12)</i>              | 2012        | Unstratified      | Stratified         | Outcome               | yes              | no                    | NA                     |
| <i>Bero et al. (13)</i>                 | 2007        | Unstratified      | Unstratified       | Outcome               | no               | NA                    | no                     |
| <i>Bhandari et al. (14)</i>             | 2004        | Unstratified      | None               | Outcome               | no               | yes                   | no                     |
| <i>Bighelli et al. (15)</i>             | 2020        | Unstratified      | Unstratified       | Quality               | no               | no                    | NA                     |
| <i>Bond et al. (16)</i>                 | 2012        | Stratified        | Unstratified       | Outcome               | yes              | NA                    | no                     |
| <i>Booth et al. (17)</i>                | 2008        | Unstratified      | None               | Outcome,<br>Quality   | no               | NA                    | NA                     |
| <i>Bourgeois et al. (18)</i>            | 2010        | Unstratified      | None               | Outcome,<br>Quality   | no               | NA                    | NA                     |
| <i>Brown et al. (19)</i>                | 2006        | Unstratified      | None               | Outcome,<br>Quality   | no               | no                    | NA                     |
| <i>Buchkowsky and<br/>Jewesson (20)</i> | 2004        | Unstratified      | Unstratified       | Outcome               | no               | NA                    | no                     |
| <i>Budhiraja et al. (21)</i>            | 2021        | Unstratified      | None               | Outcome               | no               | NA                    | NA                     |
| <i>Bugano et al et al.<br/>(22)</i>     | 2017        | Unstratified      | None               | Outcome,<br>Quality   | no               | no                    | NA                     |
| <i>Catillon (23)</i>                    | 2019        | Unstratified      | Unstratified       | Quality               | no               | no                    | NA                     |
| <i>Chang et al. (24)</i>                | 2021        | Unstratified      | None               | Quality               | no               | NA                    | NA                     |
| <i>Chard et al. (25)</i>                | 2000        | Unstratified      | None               | Outcome,<br>Quality   | no               | NA                    | NA                     |
| <i>Chen et al. (26)</i>                 | 2016        | Unstratified      | None               | Reporting             | no               | NA                    | NA                     |
| <i>Cherla et al. (27)</i>               | 2018        | None              | Stratified         | Outcome               | no               | NA                    | NA                     |
| <i>Cho and Bera (28)</i>                | 1996        | Unstratified      | None               | Outcome,<br>Quality   | yes              | no                    | NA                     |
| <i>Clark et al. (29)</i>                | 2002        | Unstratified      | None               | Outcome               | no               | no                    | NA                     |
| <i>Clifford et al. (30)</i>             | 2002        | Unstratified      | None               | Outcome,<br>Quality   | no               | NA                    | NA                     |
| <i>Corona et al. (31)</i>               | 2014a       | Unstratified      | None               | Quality,<br>Safety    | yes              | no                    | NA                     |
| <i>Corona et al. (32)</i>               | 2014b       | Unstratified      | None               | Outcome,<br>Quality   | yes              | no                    | NA                     |
| <i>Cristea et al. (33)</i>              | 2017        | None              | Unstratified       | Outcome               | no               | NA                    | no                     |
| <i>Crocetti et al. (34)</i>             | 2010        | Unstratified      | None               | Quality               | no               | NA                    | NA                     |
| <i>Davidović et al. (35)</i>            | 2021        | Unstratified      | None               | Outcome,<br>Reporting | no               | no                    | NA                     |
| <i>Davidson (36)</i>                    | 1986        | Unstratified      | None               | Outcome               | yes              | no                    | NA                     |

|    |                                           |       |              |              |                    |     |     |     |
|----|-------------------------------------------|-------|--------------|--------------|--------------------|-----|-----|-----|
| 1  |                                           |       |              |              |                    |     |     |     |
| 2  |                                           |       |              |              |                    |     |     |     |
| 3  | <i>Davis et al. (37)</i>                  | 2008  | Unstratified | None         | Outcome            | yes | no  | NA  |
| 4  | <i>de Souza Gutierrez et al. (38)</i>     | 2020  | Unstratified | None         | Quality            | no  | no  | NA  |
| 5  | <i>DeFrance et al. (39)</i>               | 2021  | None         | Unstratified | Outcome            | no  | NA  | no  |
| 6  | <i>DeGeorge et al. (40)</i>               | 2015  | Unstratified | Unstratified | Outcome            | no  | NA  | no  |
| 7  | <i>Del Paggio et al. (41)</i>             | 2017  | Unstratified | None         | Outcome, Quality   | no  | no  | NA  |
| 8  |                                           |       |              |              |                    |     |     |     |
| 9  |                                           |       |              |              |                    |     |     |     |
| 10 | <i>Falk Delgado and Falk Delgado (42)</i> | 2017a | Unstratified | None         | Outcome            | no  | NA  | NA  |
| 11 | <i>Falk Delgado and Falk Delgado (43)</i> | 2017b | Unstratified | Unstratified | Reporting          | no  | NA  | no  |
| 12 | <i>DePasse et al. (44)</i>                | 2018  | Unstratified | None         | Reporting          | no  | NA  | NA  |
| 13 | <i>DeVito et al. (45)</i>                 | 2020  | Unstratified | None         | Reporting          | no  | NA  | NA  |
| 14 | <i>Djulfbegovic et al. (46)</i>           | 2013  | Unstratified | None         | Outcome            | no  | no  | NA  |
| 15 | <i>Djulfbegovic et al. (47)</i>           | 2000  | Unstratified | None         | Quality            | yes | no  | NA  |
| 16 | <i>Eitter et al. (48)</i>                 | 2007  | Unstratified | None         | Outcome            | yes | no  | NA  |
| 17 | <i>Finucane and Boulton (49)</i>          | 2004  | Unstratified | None         | Outcome            | yes | no  | NA  |
| 18 | <i>Flacco et al. (50)</i>                 | 2015  | Unstratified | Unstratified | Outcome, Quality   | yes | yes | no  |
| 19 | <i>Fraguas et al. (51)</i>                | 2018  | Unstratified | None         | Quality            | no  | no  | NA  |
| 20 | <i>Freemantle et al. (52)</i>             | 2000  | Unstratified | None         | Outcome            | no  | no  | NA  |
| 21 | <i>Fung et al. (53)</i>                   | 2017  | Unstratified | None         | Quality, Reporting | no  | no  | NA  |
| 22 | <i>Gabler et al. (54)</i>                 | 2016  | Unstratified | None         | Reporting, Quality | no  | no  | NA  |
| 23 | <i>Gan et al. (55)</i>                    | 2012  | Unstratified | None         | Quality            | no  | no  | NA  |
| 24 | <i>Gao et al. (56)</i>                    | 2019  | Unstratified | None         | Quality            | no  | NA  | NA  |
| 25 | <i>Gartlehner et al. (57)</i>             | 2010  | Unstratified | None         | Outcome, Quality   | yes | no  | NA  |
| 26 | <i>Gandino et al. (58)</i>                | 2020  | Unstratified | Unstratified | Outcome, Quality   | yes | no  | yes |
| 27 | <i>Gonzalez et al. (59)</i>               | 2019  | Unstratified | None         | Quality            | no  | NA  | NA  |
| 28 | <i>Grey et al. (60)</i>                   | 2018  | Unstratified | None         | Outcome            | no  | no  | NA  |
| 29 | <i>Gyawali et al. (61)</i>                | 2019  | Unstratified | None         | Safety             | no  | NA  | NA  |
| 30 | <i>Hajibandeh et al. (62)</i>             | 2017  | Unstratified | Unstratified | Outcome            | no  | no  | no  |
| 31 | <i>Halpern et al. (63)</i>                | 2004  | Unstratified | None         | Quality            | no  | NA  | NA  |
| 32 | <i>Hanna et al. (64)</i>                  | 2016  | Unstratified | None         | Outcome            | no  | NA  | NA  |
| 33 | <i>Hashemipour et al. (65)</i>            | 2019  | Unstratified | Unstratified | Outcome            | no  | no  | no  |
| 34 | <i>Hengartner et al. (66)</i>             | 2021  | Unstratified | None         | Safety             | yes | no  | NA  |
| 35 | <i>Heres et al. (67)</i>                  | 2006  | Unstratified | None         | Outcome            | no  | no  | NA  |
| 36 | <i>Janiand et al. (68)</i>                | 2018  | Unstratified | None         | Outcome            | no  | yes | NA  |
| 37 | <i>Jefferson et al. (69)</i>              | 2009  | Unstratified | None         | Quality            | no  | no  | NA  |
| 38 | <i>Jellison et al. (70)</i>               | 2020  | Unstratified | None         | Quality            | no  | yes | NA  |
| 39 | <i>Jimapriya et al. (71)</i>              | 2011  | Stratified   | None         | Outcome            | no  | NA  | NA  |
| 40 | <i>Johnson et al. (72)</i>                | 2020  | Unstratified | None         | Reporting          | no  | NA  | NA  |
| 41 |                                           |       |              |              |                    |     |     |     |
| 42 |                                           |       |              |              |                    |     |     |     |
| 43 |                                           |       |              |              |                    |     |     |     |
| 44 |                                           |       |              |              |                    |     |     |     |
| 45 |                                           |       |              |              |                    |     |     |     |
| 46 |                                           |       |              |              |                    |     |     |     |
| 47 |                                           |       |              |              |                    |     |     |     |
| 48 |                                           |       |              |              |                    |     |     |     |
| 49 |                                           |       |              |              |                    |     |     |     |
| 50 |                                           |       |              |              |                    |     |     |     |
| 51 |                                           |       |              |              |                    |     |     |     |
| 52 |                                           |       |              |              |                    |     |     |     |
| 53 |                                           |       |              |              |                    |     |     |     |
| 54 |                                           |       |              |              |                    |     |     |     |
| 55 |                                           |       |              |              |                    |     |     |     |
| 56 |                                           |       |              |              |                    |     |     |     |
| 57 |                                           |       |              |              |                    |     |     |     |
| 58 |                                           |       |              |              |                    |     |     |     |
| 59 |                                           |       |              |              |                    |     |     |     |
| 60 |                                           |       |              |              |                    |     |     |     |

|    |                                            |      |              |              |                       |     |    |    |
|----|--------------------------------------------|------|--------------|--------------|-----------------------|-----|----|----|
| 1  |                                            |      |              |              |                       |     |    |    |
| 2  |                                            |      |              |              |                       |     |    |    |
| 3  | <i>Jones et al. (73)</i>                   | 2010 | Unstratified | None         | Quality               | no  | NA | NA |
| 4  | <i>Kakkar et al. (74)</i>                  | 2019 | Unstratified | None         | Quality               | no  | no | NA |
| 5  | <i>Kapelios et al. (75)</i>                | 2020 | Unstratified | None         | Outcome,<br>Quality   | no  | no | NA |
| 6  |                                            |      |              |              | Outcome               | yes | NA | NA |
| 7  | <i>Kelly et al. (76)</i>                   | 2006 | Stratified   | None         | Outcome               | yes | NA | NA |
| 8  |                                            |      |              |              |                       |     |    |    |
| 9  | <i>Kemmeren et al. (77)</i>                | 2001 | Unstratified | None         | Safety                | no  | no | NA |
| 10 | <i>Khan et al. (78)</i>                    | 2012 | Unstratified | None         | Outcome,<br>Quality   | no  | NA | NA |
| 11 |                                            |      |              |              | Outcome               | yes | no | NA |
| 12 | <i>Killin et al. (79)</i>                  | 2014 | Unstratified | None         | Outcome               | yes | no | NA |
| 13 | <i>Kjaergard and Als-<br/>Nielsen (80)</i> | 2002 | Unstratified | None         | Outcome               | no  | NA | NA |
| 14 | <i>Lee et al. (81)</i>                     | 2012 | Unstratified | None         | COI,<br>Outcome       | no  | no | NA |
| 15 |                                            |      |              |              | Reporting             | no  | no | NA |
| 16 | <i>Lee et al. (82)</i>                     | 2020 | Unstratified | None         | Outcome               | no  | no | no |
| 17 | <i>Leite et al. (83)</i>                   | 2017 | Unstratified | Unstratified | Outcome               | no  | no | no |
| 18 | <i>Leucht et al. (84)</i>                  | 2017 | Unstratified | None         | Outcome,<br>Quality   | no  | no | NA |
| 19 |                                            |      |              |              | Outcome               | no  | no | NA |
| 20 | <i>Leucht et al. (85)</i>                  | 2019 | Unstratified | None         | Outcome               | no  | no | NA |
| 21 | <i>Linker et al. (86)</i>                  | 2017 | Unstratified | None         | Outcome,<br>Quality   | no  | NA | NA |
| 22 |                                            |      |              |              | Outcome               | yes | no | NA |
| 23 | <i>Liss (87)</i>                           | 2006 | Unstratified | None         | Outcome               | yes | no | NA |
| 24 | <i>Liu et al. (88)</i>                     | 2018 | Unstratified | None         | Outcome               | no  | NA | NA |
| 25 | <i>Lubowitz et al. (89)</i>                | 2007 | Unstratified | None         | Outcome               | no  | no | NA |
| 26 | <i>Lynch et al. (90)</i>                   | 2007 | Unstratified | None         | Outcome,<br>Quality   | yes | NA | NA |
| 27 |                                            |      |              |              | Outcome,<br>Safety    | no  | no | NA |
| 28 | <i>Ma et al. (91)</i>                      | 2014 | Unstratified | None         | Reporting,<br>Outcome | no  | NA | NA |
| 29 | <i>Magnani et al. (92)</i>                 | 2021 | Unstratified | None         | Outcome               | no  | no | NA |
| 30 |                                            |      |              |              | Outcome               | no  | no | NA |
| 31 | <i>Maillet et al. (93)</i>                 | 2015 | Unstratified | None         | Outcome               | no  | no | NA |
| 32 | <i>Malek et al. (94)</i>                   | 2017 | Unstratified | None         | Outcome               | no  | no | NA |
| 33 | <i>Mian et al. (95)</i>                    | 2020 | Unstratified | None         | Quality               | no  | NA | NA |
| 34 | <i>Mitchell and<br/>Patterson (96)</i>     | 2020 | Unstratified | None         | Quality               | no  | NA | NA |
| 35 | <i>Momeni et al. (97)</i>                  | 2009 | Unstratified | None         | Outcome               | no  | NA | NA |
| 36 | <i>Moncrieff (98)</i>                      | 2003 | Unstratified | None         | Outcome               | no  | no | NA |
| 37 | <i>Montgomery et al.<br/>(99)</i>          | 2004 | Unstratified | Unstratified | Outcome,<br>Quality   | no  | no | no |
| 38 | <i>Moraes et al. (100)</i>                 | 2017 | Unstratified | Unstratified | Outcome               | no  | NA | no |
| 39 | <i>Mossman et al. (101)</i>                | 2021 | Unstratified | None         | Outcome               | no  | no | NA |
| 40 | <i>Naci et al. (102)</i>                   | 2014 | Unstratified | None         | Outcome,<br>Quality   | no  | no | NA |
| 41 |                                            |      |              |              | Quality               | no  | no | NA |
| 42 | <i>Ng et al. (103)</i>                     | 2016 | Unstratified | None         | Quality               | no  | no | NA |
| 43 | <i>Nieto et al. (104)</i>                  | 2007 | Unstratified | None         | Safety                | no  | no | NA |
| 44 | <i>Nithianandan et al.<br/>(105)</i>       | 2020 | Unstratified | Unstratified | Outcome               | no  | no | no |
| 45 | <i>Odentayo et al. (106)</i>               | 2017 | Unstratified | None         | Outcome               | no  | no | NA |
| 46 | <i>Paggio et al. (107)</i>                 | 2021 | Unstratified | None         | Quality               | no  | no | NA |
| 47 | <i>Pasalic et al. (108)</i>                | 2020 | Unstratified | None         | Quality               | no  | no | NA |
| 48 | <i>Pengel et al. (109)</i>                 | 2009 | Unstratified | None         | Quality               | yes | NA | NA |
| 49 |                                            |      |              |              |                       |     |    |    |
| 50 |                                            |      |              |              |                       |     |    |    |
| 51 |                                            |      |              |              |                       |     |    |    |
| 52 |                                            |      |              |              |                       |     |    |    |
| 53 |                                            |      |              |              |                       |     |    |    |
| 54 |                                            |      |              |              |                       |     |    |    |
| 55 |                                            |      |              |              |                       |     |    |    |
| 56 |                                            |      |              |              |                       |     |    |    |
| 57 |                                            |      |              |              |                       |     |    |    |
| 58 |                                            |      |              |              |                       |     |    |    |
| 59 |                                            |      |              |              |                       |     |    |    |
| 60 |                                            |      |              |              |                       |     |    |    |

|    |                               |       |              |              |                      |     |     |    |
|----|-------------------------------|-------|--------------|--------------|----------------------|-----|-----|----|
| 1  |                               |       |              |              |                      |     |     |    |
| 2  |                               |       |              |              |                      |     |     |    |
| 3  | <i>Pepper et al. (110)</i>    | 2019  | Unstratified | None         | Safety               | no  | no  | NA |
| 4  | <i>Peppercorn et al.</i>      | 2007  | Unstratified | Unstratified | Outcome              | yes | no  | no |
| 5  | <i>(111)</i>                  |       |              |              |                      |     |     |    |
| 6  | <i>Perlis et al. (112)</i>    | 2005a | Unstratified | Unstratified | Outcome, Quality     | yes | no  | no |
| 7  |                               |       |              |              |                      |     |     |    |
| 8  | <i>Perlis et al. (113)</i>    | 2005b | Unstratified | Unstratified | Outcome              | yes | no  | no |
| 9  | <i>Popelut et al. (114)</i>   | 2010  | Unstratified | None         | Outcome              | no  | NA  | no |
| 10 | <i>Pouwels et al. (115)</i>   | 2017  | Unstratified | None         | Outcome, Quality     | no  | no  | NA |
| 11 |                               |       |              |              |                      |     |     |    |
| 12 | <i>Prakash et al. (116)</i>   | 2018  | Unstratified | None         | Quality              | no  | NA  | NA |
| 13 | <i>Price-Haywood et al.</i>   | 2019  | Unstratified | None         | Safety               | no  | NA  | NA |
| 14 | <i>(117)</i>                  |       |              |              |                      |     |     |    |
| 15 | <i>Printz et al. (118)</i>    | 2013  | Unstratified | None         | Outcome              | yes | no  | NA |
| 16 | <i>Probst et al. (119)</i>    | 2016  | Unstratified | None         | Outcome              | no  | no  | NA |
| 17 | <i>Punja et al. (120)</i>     | 2016  | Unstratified | None         | Outcome, Safety      | no  | no  | NA |
| 18 |                               |       |              |              |                      |     |     |    |
| 19 | <i>Putman et al. (121)</i>    | 2021  | Unstratified | None         | Quality              | yes | no  | NA |
| 20 | <i>Raman et al. (122)</i>     | 2018  | Unstratified | Unstratified | Outcome              | no  | NA  | no |
| 21 | <i>Rasmussen et al.</i>       | 2009  | Unstratified | None         | Outcome              | yes | yes | NA |
| 22 | <i>(123)</i>                  |       |              |              |                      |     |     |    |
| 23 | <i>Rattinger and Bero</i>     | 2009  | Stratified   | Stratified   | Outcome              | yes | NA  | NA |
| 24 | <i>(124)</i>                  |       |              |              |                      |     |     |    |
| 25 | <i>Reda et al. (125)</i>      | 2016  | Unstratified | None         | Outcome, Quality     | no  | yes | NA |
| 26 |                               |       |              |              |                      |     |     |    |
| 27 | <i>Rees et al. (126)</i>      | 2019  | Unstratified | None         | Reporting            | no  | NA  | NA |
| 28 | <i>Ridker and Torres</i>      | 2006  | Unstratified | None         | Outcome              | no  | NA  | NA |
| 29 | <i>(127)</i>                  |       |              |              |                      |     |     |    |
| 30 | <i>Rios et al. (128)</i>      | 2008  | Unstratified | None         | Quality              | no  | NA  | NA |
| 31 | <i>Rochon et al. (129)</i>    | 1994  | Unstratified | None         | Outcome, Quality     | yes | no  | NA |
| 32 |                               |       |              |              |                      |     |     |    |
| 33 | <i>Roddick et al. (130)</i>   | 2017  | Unstratified | None         | Outcome              | no  | NA  | NA |
| 34 | <i>Roper et al. (131)</i>     | 2014  | Unstratified | None         | Limitations, Outcome | no  | NA  | NA |
| 35 |                               |       |              |              |                      |     |     |    |
| 36 | <i>Rosner et al. (132)</i>    | 2010  | Unstratified | None         | Outcome, Quality     | no  | no  | NA |
| 37 | <i>Rosner et al. (133)</i>    | 2011  | Unstratified | None         | Outcome              | no  | NA  | no |
| 38 | <i>Saa et al. (134)</i>       | 2018  | Stratified   | None         | Outcome, Quality     | yes | NA  | NA |
| 39 | <i>Saleh et al. (135)</i>     | 2020  | Unstratified | None         | Outcome              | no  | no  | NA |
| 40 | <i>Sendyk et al. (136)</i>    | 2019  | Unstratified | None         | Quality, Reporting   | no  | no  | NA |
| 41 |                               |       |              |              |                      |     |     |    |
| 42 | <i>Shepard et al. (137)</i>   | 2021  | Unstratified | None         | Quality              | no  | NA  | NA |
| 43 | <i>Silva et al. (138)</i>     | 2017  | Unstratified | None         | Safety, Quality      | no  | no  | NA |
| 44 |                               |       |              |              |                      |     |     |    |
| 45 | <i>Simonetti et al. (139)</i> | 2019  | Unstratified | None         | Safety               | no  | no  | NA |
| 46 | <i>Sinyor et al. (140)</i>    | 2012  | Unstratified | None         | Outcome, Safety      | yes | no  | NA |
| 47 |                               |       |              |              |                      |     |     |    |
| 48 | <i>Son et al. (141)</i>       | 2016  | Unstratified | None         | Outcome              | no  | no  | NA |
| 49 | <i>Spanenberg et al.</i>      | 2011  | Unstratified | None         | Outcome, Quality     | no  | no  | NA |
| 50 | <i>(142)</i>                  |       |              |              |                      |     |     |    |
| 51 | <i>Sriganesh et al. (143)</i> | 2017  | Unstratified | None         | Quality              | no  | no  | NA |
| 52 | <i>Stefaniak et al. (144)</i> | 2017  | Unstratified | None         | Reporting, Quality   | no  | NA  | NA |
| 53 |                               |       |              |              |                      |     |     |    |
| 54 | <i>Steffens et al. (145)</i>  | 2021  | Unstratified | None         | Quality              | yes | no  | NA |
| 55 |                               |       |              |              |                      |     |     |    |
| 56 |                               |       |              |              |                      |     |     |    |
| 57 |                               |       |              |              |                      |     |     |    |
| 58 |                               |       |              |              |                      |     |     |    |
| 59 |                               |       |              |              |                      |     |     |    |
| 60 |                               |       |              |              |                      |     |     |    |

1  
2  
3  
4  
5  
6  
7  
8  
9  
10  
11  
12  
13  
14  
15  
16  
17  
18  
19  
20  
21  
22  
23  
24  
25  
26  
27  
28  
29  
30  
31  
32  
33  
34  
35  
36  
37  
38  
39  
40  
41  
42  
43  
44  
45  
46  
47  
48  
49  
50  
51  
52  
53  
54  
55  
56  
57  
58  
59  
60

|                                    |      |              |              |                  |     |     |     |
|------------------------------------|------|--------------|--------------|------------------|-----|-----|-----|
| <i>Sung et al. (146)</i>           | 2013 | Unstratified | None         | Outcome          | yes | no  | NA  |
| <i>Tiabau et al. (147)</i>         | 2018 | Unstratified | None         | Outcome          | no  | NA  | NA  |
| <i>Trinquart et al. (148)</i>      | 2018 | Unstratified | None         | Reporting        | no  | no  | NA  |
| <i>Tulikangas et al. (149)</i>     | 2006 | Unstratified | None         | Outcome          | no  | no  | NA  |
| <i>Tungaraza and Poole (150)</i>   | 2007 | Unstratified | Unstratified | Outcome          | no  | no  | no  |
| <i>Urrutia et al. (151)</i>        | 2016 | Unstratified | None         | Reporting        | no  | no  | NA  |
| <i>van den Bogert et al. (152)</i> | 2017 | Unstratified | None         | Quality          | no  | yes | NA  |
| <i>van Heteren et al. (153)</i>    | 2019 | Unstratified | None         | Reporting        | no  | NA  | NA  |
| <i>Van Lent et al. (154)</i>       | 2014 | Unstratified | None         | Outcome          | yes | NA  | NA  |
| <i>Venincasa et al. (155)</i>      | 2019 | Unstratified | Unstratified | Outcome          | no  | no  | no  |
| <i>Vlad et al. (156)</i>           | 2007 | Stratified   | Unstratified | Outcome, Quality | no  | NA  | no  |
| <i>Walkup et al. (157)</i>         | 2017 | Unstratified | None         | Outcome          | no  | no  | NA  |
| <i>Walter et al. (158)</i>         | 2020 | Unstratified | None         | Reporting        | no  | no  | NA  |
| <i>Waqas et al. (159)</i>          | 2019 | Unstratified | Unstratified | Outcome          | no  | no  | no  |
| <i>Welsb et al. (160)</i>          | 2018 | Unstratified | Unstratified | Reporting        | no  | NA  | no  |
| <i>Wise et al. (161)</i>           | 2021 | Unstratified | Unstratified | Outcome          | no  | yes | yes |
| <i>Wong et al. (162)</i>           | 2019 | Unstratified | None         | Outcome          | no  | no  | NA  |
| <i>Wortzel et al. (163)</i>        | 2020 | Unstratified | None         | Quality          | no  | NA  | NA  |
| <i>Xu et al. (164)</i>             | 2013 | Unstratified | None         | Safety           | no  | no  | NA  |
| <i>Yilmaz et al. (165)</i>         | 2018 | Unstratified | None         | Reporting        | no  | no  | NA  |
| <i>Youssef et al. (166)</i>        | 2016 | Unstratified | None         | Outcome          | no  | no  | NA  |
| <i>Zhang et al. (167)</i>          | 2013 | Unstratified | None         | Outcome, Safety  | no  | no  | NA  |

**Supplemental Table 2. Methodological Design Analysis for All Collected Articles.** Includes industry funding IV type, author COI IV type, DV type(s), COI as proxy, and dichotomization data.

### Supplemental References

1. Abildgaard JT, Chung AS, Tokish JM, Hattrup SJ. Clinical efficacy of liposomal bupivacaine: a systematic review of prospective, randomized controlled trials in orthopaedic surgery. *JBJS Rev.* 2019 Jul;7(7):e8.
2. Addeo A, Weiss GJ, Gyawali B. Association of industry and academic sponsorship with negative phase 3 oncology trials and reported outcomes on participant survival: A pooled analysis. *JAMA Netw Open.* 2019 May 3;2(5):e193684.
3. Ahmer S, Arya P, Anderson D, Faruqui R. Conflict of interest in psychiatry. *Psychiatric Bulletin.* 2005 Aug;29(8):302–4.
4. Ahn R, Woodbridge A, Abraham A, Saba S, Korenstein D, Madden E, et al. Financial ties of principal investigators and randomized controlled trial outcomes: cross sectional study. *BMJ.* 2017 Jan 17;356:i6770.
5. Alasbali T, Smith M, Geffen N, Trope GE, Flanagan JG, Jin Y, et al. Discrepancy between results and abstract conclusions in industry- vs nonindustry-funded studies comparing topical prostaglandins. *Am J Ophthalmol.* 2009 Jan;147(1):33-38.e2.

6. Als-Nielsen B, Chen W, Gluud C, Kjaergard LL. Association of funding and conclusions in randomized drug trials: a reflection of treatment effect or adverse events? *JAMA*. 2003 Aug 20;290(7):921–8.
7. Avni T, Shiber-Ofer S, Leibovici L, Paul M. Assessment of bias in outcomes reported in trials on pneumonia: a systematic review. *Eur J Clin Microbiol Infect Dis*. 2014 Jun;33(6):969–74.
8. Azad TD, Feng AY, Mehta S, Bak AB, Johnson E, Mittal V, et al. Randomized controlled trials in functional neurosurgery—association of device approval status and trial quality. *Neuromodulation: Technology at the Neural Interface*. 2020;23(4):496–501.
9. Azharuddin M, Adil M, Khan RA, Ghosh P, Kapur P, Sharma M. Systematic evidence of health economic evaluation of drugs for postmenopausal osteoporosis: A quality appraisal. *Osteoporosis and Sarcopenia*. 2020 Jun 1;6(2):39–52.
10. Barden J, Derry S, McQuay HJ, Moore AR. Bias from industry trial funding? A framework, a suggested approach, and a negative result. *Pain*. 2006 Apr;121(3):207–18.
11. Bariani GM, de Celis Ferrari ACR, Hoff PM, Krzyzanowska MK, Riechelmann RP. Self-reported conflicts of interest of authors, trial sponsorship, and the interpretation of editorials and related phase III trials in oncology. *J Clin Oncol*. 2013 Jun 20;31(18):2289–95.
12. Bartels RHMA, Delye H, Boogaarts J. Financial disclosures of authors involved in spine research: an underestimated source of bias. *Eur Spine J*. 2012 Jul;21(7):1229–33.
13. Bero L, Oostvogel F, Bacchetti P, Lee K. Factors associated with findings of published trials of drug-drug comparisons: why some statins appear more efficacious than others. *PLoS Med*. 2007 Jun;4(6):e184.
14. Bhandari M, Busse JW, Jackowski D, Montori VM, Schünemann H, Sprague S, et al. Association between industry funding and statistically significant pro-industry findings in medical and surgical randomized trials. *CMAJ*. 2004 Feb 17;170(4):477–80.
15. Bighelli I, Leucht C, Huhn M, Reitmeir C, Schwermann F, Wallis S, et al. Are randomized controlled trials on pharmacotherapy and psychotherapy for positive symptoms of schizophrenia comparable? a systematic review of patient and study characteristics. *Schizophr Bull*. 2020 Apr 10;46(3):496–504.
16. Bond K, Spooner C, Tjosvold L, Lemièrre C, Rowe BH. The nature and influence of pharmaceutical industry involvement in asthma trials. *Can Respir J*. 2012;19(4):267–71.
17. Booth CM, Cescon DW, Wang L, Tannock IF, Krzyzanowska MK. Evolution of the randomized controlled trial in oncology over three decades. *J Clin Oncol*. 2008 Nov 20;26(33):5458–64.
18. Bourgeois FT, Murthy S, Mandl KD. Outcome reporting among drug trials registered in ClinicalTrials.gov. *Ann Intern Med*. 2010 Aug 3;153(3):158–66.
19. Brown A, Kraft D, Schmitz SM, Sharpless V, Martin C, Shah R, et al. Association of industry sponsorship to published outcomes in gastrointestinal clinical research. *Clin Gastroenterol Hepatol*. 2006 Dec;4(12):1445–51.
20. Buchkowsky SS, Jewesson PJ. Industry sponsorship and authorship of clinical trials over 20 years. *Ann Pharmacother*. 2004 Apr;38(4):579–85.
21. Budhiraja P, Kaplan B, Kalot M, Alayli AE, Dimassi A, Chakkerla HA, et al. Current state of evidence on kidney transplantation: how fragile are the results? *Transplantation*. 2022 Feb 1;106(2):248–56.
22. Bugano DDG, Hess K, Jardim DLF, Zer A, Meric-Bernstam F, Siu LL, et al. Use of expansion cohorts in phase I trials and probability of success in phase II for 381 anticancer drugs. *Clin Cancer Res*. 2017 Aug 1;23(15):4020–6.
23. Catillon M. Trends and predictors of biomedical research quality, 1990-2015: A meta-research study. *BMJ Open*. 2019 Sep 1;9:e030342.
24. Chang MJ, Qiu Y, Lipner SR. Race reporting and representation in onychomycosis clinical trials: A systematic review. *Mycoses*. 2021 Aug;64(8):954–66.
25. Chard JA, Tallon D, Dieppe PA. Epidemiology of research into interventions for the treatment of osteoarthritis of the knee joint. *Ann Rheum Dis*. 2000 Jun;59(6):414–8.
26. Chen Y-P, Liu X, Lv J-W, Li W-F, Zhang Y, Guo Y, et al. Publication status of contemporary oncology randomised controlled trials worldwide. *Eur J Cancer*. 2016 Oct;66:17–25.



27. Cherla DV, Viso CP, Holihan JL, Bernardi K, Moses ML, Mueck KM, et al. The effect of financial conflict of interest, disclosure status, and relevance on medical research from the united states. *J Gen Intern Med.* 2019 Mar;34(3):429–34.
28. Cho MK, Bero LA. The quality of drug studies published in symposium proceedings. *Ann Intern Med.* 1996 Mar 1;124(5):485–9.
29. Clark O, Adams JR, Bennett CL, Djulbegovic B. Erythropoietin, uncertainty principle and cancer related anaemia. *BMC Cancer.* 2002 Sep 24;2:23.
30. Clifford TJ, Barrowman NJ, Moher D. Funding source, trial outcome and reporting quality: are they related? Results of a pilot study. *BMC Health Serv Res.* 2002 Sep 4;2(1):18.
31. Corona G, Isidori AM, Buvat J, Aversa A, Rastrelli G, Hackett G, et al. Testosterone supplementation and sexual function: a meta-analysis study. *J Sex Med.* 2014 Jun;11(6):1577–92.
32. Corona G, Maseroli E, Rastrelli G, Isidori AM, Sforza A, Mannucci E, et al. Cardiovascular risk associated with testosterone-boosting medications: a systematic review and meta-analysis. *Expert Opin Drug Saf.* 2014 Oct;13(10):1327–51.
33. Cristea IA, Gentili C, Pietrini P, Cuijpers P. Is investigator background related to outcome in head to head trials of psychotherapy and pharmacotherapy for adult depression? A systematic review and meta-analysis. *PLoS One.* 2017;12(2):e0171654.
34. Crocetti MT, Amin DD, Scherer R. Assessment of risk of bias among pediatric randomized controlled trials. *Pediatrics.* 2010 Aug;126(2):298–305.
35. Vrljićak Davidović N, Komić L, Mešin I, Kotarac M, Okmažić D, Franić T. Registry versus publication: discrepancy of primary outcomes and possible outcome reporting bias in child and adolescent mental health. *Eur Child Adolesc Psychiatry.* 2021 Jan 18;
36. Davidson RA. Source of funding and outcome of clinical trials. *J Gen Intern Med.* 1986 Jun;1(3):155–8.
37. Davis JM, Chen N, Glick ID. Issues that may determine the outcome of antipsychotic trials: industry sponsorship and extrapyramidal side effect. *Neuropsychopharmacology.* 2008 Apr;33(5):971–5.
38. de Souza Gutierrez B, Aguiar PN, Dourado BB, Alves AL, Matsas S, Simões AR, et al. Evidence strength of pharmaceutical industry-funded clinical trials in metastatic nscl: a comparison with other sources of funding. *J Thorac Oncol.* 2020 Jul;15(7):1170–6.
39. DeFrance MJ, Yayac MF, Courtney PM, Squire MW. The impact of author financial conflicts on robotic-assisted joint arthroplasty research. *J Arthroplasty.* 2021 Apr;36(4):1462–9.
40. DeGeorge BR, Holland MC, Drake DB. The impact of conflict of interest in abdominal wall reconstruction with acellular dermal matrix. *Ann Plast Surg.* 2015 Feb;74(2):242–7.
41. Del Paggio JC, Azariah B, Sullivan R, Hopman WM, James FV, Roshni S, et al. Do contemporary randomized controlled trials meet ESMO thresholds for meaningful clinical benefit? *Ann Oncol.* 2017 Jan 1;28(1):157–62.
42. Falk Delgado A, Falk Delgado A. The association of funding source on effect size in randomized controlled trials: 2013-2015 - a cross-sectional survey and meta-analysis. *Trials.* 2017 Mar 14;18(1):125.
43. Falk Delgado A, Falk Delgado A. Outcome switching in randomized controlled oncology trials reporting on surrogate endpoints: a cross-sectional analysis. *Sci Rep.* 2017 Aug 23;7:9206.
44. DePasse JM, Park S, Eltorai AEM, Daniels AH. Factors predicting publication of spinal cord injury trials registered on www.ClinicalTrials.gov. *J Back Musculoskelet Rehabil.* 2018 Feb 6;31(1):45–8.
45. DeVito NJ, Bacon S, Goldacre B. Compliance with legal requirement to report clinical trial results on ClinicalTrials.gov: a cohort study. *Lancet.* 2020 Feb 1;395(10221):361–9.
46. Djulbegovic B, Lacevic M, Cantor A, Fields KK, Bennett CL, Adams JR, et al. The uncertainty principle and industry-sponsored research. *Lancet.* 2000 Aug 19;356(9230):635–8.
47. Djulbegovic B, Kumar A, Miladinovic B, Reljic T, Galeb S, Mhaskar A, et al. Treatment success in cancer: industry compared to publicly sponsored randomized controlled trials. *PLoS One.* 2013;8(3):e58711.
48. Etter J-F, Burri M, Stapleton J. The impact of pharmaceutical company funding on results of randomized trials of nicotine replacement therapy for smoking cessation: a meta-analysis. *Addiction.* 2007 May;102(5):815–22.

49. Finucane TE, Boulton CE. Association of funding and findings of pharmaceutical research at a meeting of a medical professional society. *Am J Med.* 2004 Dec 1;117(11):842–5.
50. Flacco ME, Manzoli L, Boccia S, Capasso L, Aleksovska K, Rosso A, et al. Head-to-head randomized trials are mostly industry sponsored and almost always favor the industry sponsor. *J Clin Epidemiol.* 2015 Jul;68(7):811–20.
51. Fraguas D, Díaz-Caneja CM, Pina-Camacho L, Umbricht D, Arango C. Predictors of placebo response in pharmacological clinical trials of negative symptoms in schizophrenia: a meta-regression analysis. *Schizophr Bull.* 2019 Jan 1;45(1):57–68.
52. Freemantle N, Anderson IM, Young P. Predictive value of pharmacological activity for the relative efficacy of antidepressant drugs. Meta-regression analysis. *Br J Psychiatry.* 2000 Oct;177:292–302.
53. Fung M, Yuan Y, Atkins H, Shi Q, Bubela T. Responsible translation of stem cell research: an assessment of clinical trial registration and publications. *Stem Cell Reports.* 2017 May 9;8(5):1190–201.
54. Gabler NB, Duan N, Ranases E, Suttner L, Ciarametaro M, Cooney E, et al. No improvement in the reporting of clinical trial subgroup effects in high-impact general medical journals. *Trials.* 2016 Jul 16;17(1):320.
55. Gan HK, You B, Pond GR, Chen EX. Assumptions of expected benefits in randomized phase III trials evaluating systemic treatments for cancer. *J Natl Cancer Inst.* 2012 Apr 18;104(8):590–8.
56. Gao Y, Ge L, Ma X, Shen X, Liu M, Tian J. Improvement needed in the network geometry and inconsistency of Cochrane network meta-analyses: a cross-sectional survey. *J Clin Epidemiol.* 2019 Sep;113:214–27.
57. Gartlehner G, Morgan L, Thieda P, Fleg A. The effect of study sponsorship on a systematically evaluated body of evidence of head-to-head trials was modest: secondary analysis of a systematic review. *J Clin Epidemiol.* 2010 Feb;63(2):117–25.
58. Gaudino M, Hameed I, Rahouma M, Khan FM, Tam DY, Biondi-Zoccai G, et al. Characteristics of contemporary randomized clinical trials and their association with the trial funding source in invasive cardiovascular interventions. *JAMA Intern Med.* 2020 Jul 1;180(7):993–1001.
59. González-González JG, Dorsey-Treviño EG, Alvarez-Villalobos N, Barrera-Flores FJ, Díaz González-Colmenero A, Quintanilla-Sánchez C, et al. Trustworthiness of randomized trials in endocrinology-A systematic survey. *PLoS One.* 2019;14(2):e0212360.
60. Grey P, Grey A, Bolland MJ. Outcomes, interventions and funding in randomised research published in high-impact journals. *Trials.* 2018 Oct 29;19(1):592.
61. Gyawali B, Tessema FA, Jung EH, Kesselheim AS. Assessing the justification, funding, success, and survival outcomes of randomized noninferiority trials of cancer drugs: a systematic review and pooled analysis. *JAMA Netw Open.* 2019 Aug 2;2(8):e199570.
62. Hajibandeh S, Hajibandeh S, Antoniou SA, Antoniou GA, Torella F. Industry sponsorship and positive outcome in vascular and endovascular randomised trials. *Vasa.* 2017 Jan;46(1):67–8.
63. Halpern SD, Barton TD, Gross R, Hennessy S, Berlin JA, Strom BL. Epidemiologic studies of adverse effects of anti-retroviral drugs: how well is statistical power reported. *Pharmacoepidemiol Drug Saf.* 2005 Mar;14(3):155–61.
64. Hanna E, Rémuzat C, Auquier P, Toumi M. Risk of discontinuation of Advanced Therapy Medicinal Products clinical trials. *J Mark Access Health Policy.* 2016;4.
65. Hashemipour MA, Pourmonajemzadeh S, Zoghitavana S, Navabi N. Relationship between declarations of conflict of interests and reporting positive outcomes in Iranian dental journals. *Sci Eng Ethics.* 2019 Aug;25(4):1057–67.
66. Hengartner MP, Amendola S, Kaminski JA, Kindler S, Bschor T, Plöderl M. Suicide risk with selective serotonin reuptake inhibitors and other new-generation antidepressants in adults: a systematic review and meta-analysis of observational studies. *J Epidemiol Community Health.* 2021 Mar 8;jech-2020-214611.
67. Heres S, Davis J, Maino K, Jetzinger E, Kissling W, Leucht S. Why olanzapine beats risperidone, risperidone beats quetiapine, and quetiapine beats olanzapine: an exploratory analysis of head-to-head comparison studies of second-generation antipsychotics. *Am J Psychiatry.* 2006 Feb;163(2):185–94.

68. Janiaud P, Cristea I-A, Ioannidis JPA. Industry-funded versus non-profit-funded critical care research: a meta-epidemiological overview. *Intensive Care Med.* 2018 Oct;44(10):1613–27.
69. Jefferson T, Di Pietrantonj C, Debalini MG, Rivetti A, Demicheli V. Relation of study quality, concordance, take home message, funding, and impact in studies of influenza vaccines: systematic review. *BMJ.* 2009 Feb 12;338:b354.
70. Jellison S, Roberts W, Bowers A, Combs T, Beaman J, Wayant C, et al. Evaluation of spin in abstracts of papers in psychiatry and psychology journals. *BMJ Evid Based Med.* 2019 Aug 5;178–81.
71. Jinapriya D, Anraku A, Alasbali T, Trope GE, Buys YM. Evaluation of investigator bias in industry-funded clinical trials of latanoprost. *Can J Ophthalmol.* 2011 Dec;46(6):531–6.
72. Johnson AL, Fladie I, Anderson JM, Lewis DM, Mons BR, Vassar M. Rates of discontinuation and nonpublication of head and neck cancer randomized clinical trials. *JAMA Otolaryngol Head Neck Surg.* 2020 Feb 1;146(2):176–82.
73. Jones R, Younie S, Macallister A, Thornton J. A comparison of the scientific quality of publicly and privately funded randomized controlled drug trials. *J Eval Clin Pract.* 2010 Dec;16(6):1322–5.
74. Kakkar AK, Padhy BM, Sarangi SC, Gupta YK. Methodological characteristics of clinical trials: impact of mandatory trial registration. *J Pharm Pharm Sci.* 2019;22(1):131–41.
75. Kapelios CJ, Naci H, Vardas PE, Mossialos E. Study design, result posting and publication of late-stage cardiovascular trials. *Eur Heart J Qual Care Clin Outcomes.* 2020 Oct 24;qcaa080.
76. Kelly R, Cohen L, Semple R, Bialer P, Lau A, Bodenheimer A, et al. Relationship between drug company funding and outcomes of clinical psychiatric research. *Psychological medicine.* 2006 Dec 1;36:1647–56.
77. Kemmeren JM, Algra A, Grobbee DE. Third generation oral contraceptives and risk of venous thrombosis: meta-analysis. *BMJ.* 2001 Jul 21;323(7305):131–4.
78. Khan NA, Lombeida JI, Singh M, Spencer HJ, Torralba KD. Association of industry funding with the outcome and quality of randomized controlled trials of drug therapy for rheumatoid arthritis. *Arthritis Rheum.* 2012 Jul;64(7):2059–67.
79. Killin LOJ, Russ TC, Starr JM, Abrahams S, Della Sala S. The effect of funding sources on donepezil randomised controlled trial outcome: a meta-analysis. *BMJ Open.* 2014 Apr 7;4(4):e004083.
80. Kjaergard LL, Als-Nielsen B. Association between competing interests and authors' conclusions: epidemiological study of randomised clinical trials published in the BMJ. *BMJ.* 2002 Aug 3;325(7358):249.
81. Lee KC, Wu BW, Chuang S-K. Which factors affect the completion and publication of dental implant trials? *J Oral Maxillofac Surg.* 2020 Oct;78(10):1726–35.
82. Lee Y-K, Chung CY, Koo K-H, Lee KM, Ji H-M, Park MS. Conflict of interest in the assessment of thromboprophylaxis after total joint arthroplasty: a systematic review. *J Bone Joint Surg Am.* 2012 Jan 4;94(1):27–33.
83. Leite ETT, Moraes FY, Marta GN, Taunk NK, Vieira MTL, Hanna SA, et al. Trial sponsorship and self-reported conflicts of interest in breast cancer radiation therapy: An analysis of prospective clinical trials. *Breast.* 2017 Jun;33:29–33.
84. Leucht S, Chaimani A, Mavridis D, Leucht C, Huhn M, Helfer B, et al. Disconnection of drug-response and placebo-response in acute-phase antipsychotic drug trials on schizophrenia? Meta-regression analysis. *Neuropsychopharmacology.* 2019 Oct;44(11):1955–66.
85. Leucht S, Leucht C, Huhn M, Chaimani A, Mavridis D, Helfer B, et al. Sixty years of placebo-controlled antipsychotic drug trials in acute schizophrenia: systematic review, bayesian meta-analysis, and meta-regression of efficacy predictors. *Am J Psychiatry.* 2017 Oct 1;174(10):927–42.
86. Liang F, Zhu J, Mo M, Zhou CM, Jia HX, Xie L, et al. Role of industry funders in oncology RCTs published in high-impact journals and its association with trial conclusions and time to publication. *Ann Oncol.* 2018 Oct 1;29(10):2129–34.
87. Liss H. Publication bias in the pulmonary/allergy literature: effect of pharmaceutical company sponsorship. *Isr Med Assoc J.* 2006 Jul;8(7):451–4.

- 1
  - 2
  - 3
  - 4
  - 5
  - 6
  - 7
  - 8
  - 9
  - 10
  - 11
  - 12
  - 13
  - 14
  - 15
  - 16
  - 17
  - 18
  - 19
  - 20
  - 21
  - 22
  - 23
  - 24
  - 25
  - 26
  - 27
  - 28
  - 29
  - 30
  - 31
  - 32
  - 33
  - 34
  - 35
  - 36
  - 37
  - 38
  - 39
  - 40
  - 41
  - 42
  - 43
  - 44
  - 45
  - 46
  - 47
  - 48
  - 49
  - 50
  - 51
  - 52
  - 53
  - 54
  - 55
  - 56
  - 57
  - 58
  - 59
  - 60
88. Liu X, Zhang Y, Tang L-L, Le QT, Chua MLK, Wee JTS, et al. Characteristics of radiotherapy trials compared with other oncological clinical trials in the past 10 years. *JAMA Oncol*. 2018 Aug 1;4(8):1073–9.
89. Lubowitz JH, Appleby D, Centeno JM, Woolf SK, Reid JB. The relationship between the outcome of studies of autologous chondrocyte implantation and the presence of commercial funding. *Am J Sports Med*. 2007 Nov;35(11):1809–16.
90. Lynch J, Cunningham M, Warne W, Schaad D, Wolf F, Leopold S. Commercially funded and united states-based research is more likely to be published; good-quality studies with negative outcomes are not. *The Journal of bone and joint surgery American volume*. 2007 Jun 1;89:1010–8.
91. Ma D, Zhang Z, Zhang X, Li L. Comparative efficacy, acceptability, and safety of medicinal, cognitive-behavioral therapy, and placebo treatments for acute major depressive disorder in children and adolescents: a multiple-treatments meta-analysis. *Curr Med Res Opin*. 2014 Jun;30(6):971–95.
92. Magnani CJ, Steinberg JR, Harmange CI, Zhang X, Driscoll C, Bell A, et al. Clinical trial outcomes in urology: assessing early discontinuation, results reporting and publication in *clinicaltrials.gov* registrations 2007-2019. *J Urol*. 2021 Apr;205(4):1159–68.
93. Maillet D, Blay JY, You B, Rachdi A, Gan HK, Péron J. The reporting of adverse events in oncology phase III trials: a comparison of the current status versus the expectations of the EORTC members. *Ann Oncol*. 2016 Jan;27(1):192–8.
94. Malek E, Saygin C, Ye R, Covut F, Kim B-G, Welge J, et al. Predicting successful phase advancement and regulatory approval in multiple myeloma from phase I overall response rates. *JCO Clin Cancer Inform*. 2017 Nov;1:1–14.
95. Mian MK, Sreedharan S, Limaye NS, Hogan C, Darvall JN. Research trends in anticoagulation therapy over the last 25 years. *Semin Thromb Hemost*. 2020 Nov;46(8):919–31.
96. Mitchell JM, Patterson JA. The Inclusion of Economic Endpoints as Outcomes in Clinical Trials Reported to *ClinicalTrials.gov*. *J Manag Care Spec Pharm*. 2020 Apr;26(4):386–93.
97. Momeni A, Becker A, Bannasch H, Antes G, Blümle A, Stark GB. Association between research sponsorship and study outcome in plastic surgery literature. *Ann Plast Surg*. 2009 Dec;63(6):661–4.
98. Moncrieff J. Clozapine v. conventional antipsychotic drugs for treatment-resistant schizophrenia: a re-examination. *Br J Psychiatry*. 2003 Aug;183:161–6.
99. Montgomery JH, Byerly M, Carmody T, Li B, Miller DR, Varghese F, et al. An analysis of the effect of funding source in randomized clinical trials of second generation antipsychotics for the treatment of schizophrenia. *Control Clin Trials*. 2004 Dec;25(6):598–612.
100. Moraes FY, Mendez LC, Taunk NK, Raman S, Suh JH, Souhami L, et al. Funding source, conflict of interest and positive conclusions in neuro-oncology clinical trials. *J Neurooncol*. 2018 Feb;136(3):585–93.
101. Mossman SA, Mills JA, Walkup JT, Strawn JR. The impact of failed antidepressant trials on outcomes in children and adolescents with anxiety and depression: a systematic review and meta-analysis. *J Child Adolesc Psychopharmacol*. 2021 May;31(4):259–67.
102. Naci H, Dias S, Ades AE. Industry sponsorship bias in research findings: a network meta-analysis of LDL cholesterol reduction in randomised trials of statins. *BMJ*. 2014 Oct 3;349:g5741.
103. Ng T, Mazzarello S, Wang Z, Hutton B, Dranitsaris G, Vandermeer L, et al. Choice of study endpoint significantly impacts the results of breast cancer trials evaluating chemotherapy-induced nausea and vomiting. *Breast Cancer Res Treat*. 2016 Jan;155(2):337–44.
104. Nieto A, Mazon A, Pamies R, Linana JJ, Lanuza A, Jiménez FO, et al. Adverse effects of inhaled corticosteroids in funded and nonfunded studies. *Arch Intern Med*. 2007 Oct 22;167(19):2047–53.
105. Nithianandan H, Kuriyan AE, Venincasa MJ, Sridhar J. Analysis of Funding Source and Spin in the Reporting of Studies of Intravitreal Corticosteroid Therapy for Diabetic Macular Edema: A Systematic Review. *Clin Ophthalmol*. 2020;14:2383–95.
106. Odutayo A, Emdin CA, Hsiao AJ, Shakir M, Copsey B, Dutton S, et al. Association between trial registration and positive study findings: cross sectional study (Epidemiological Study of Randomized Trials-ESORT). *BMJ*. 2017 Mar 14;356:j917.

107. Del Paggio JC, Berry JS, Hopman WM, Eisenhauer EA, Prasad V, Gyawali B, et al. Evolution of the Randomized Clinical Trial in the Era of Precision Oncology. *JAMA Oncol.* 2021 May 1;7(5):728–34.
108. Pasalic D, McGinnis GJ, Fuller CD, Grossberg AJ, Verma V, Mainwaring W, et al. Progression-free survival is a suboptimal predictor for overall survival among metastatic solid tumour clinical trials. *Eur J Cancer.* 2020 Sep;136:176–85.
109. Pengel LHM, Barcena L, Morris PJ. The quality of reporting of randomized controlled trials in solid organ transplantation. *Transpl Int.* 2009 Apr;22(4):377–84.
110. Pepper DJ, Sun J, Rhee C, Welsh J, Powers JH, Danner RL, et al. Procalcitonin-guided antibiotic discontinuation and mortality in critically ill adults. *Chest.* 2019 Jun;155(6):1109–18.
111. Peppercorn J, Blood E, Winer E, Partridge A. Association between pharmaceutical involvement and outcomes in breast cancer clinical trials. *Cancer.* 2007 Apr 1;109(7):1239–46.
112. Perlis CS, Harwood M, Perlis RH. Extent and impact of industry sponsorship conflicts of interest in dermatology research. *J Am Acad Dermatol.* 2005 Jun;52(6):967–71.
113. Perlis RH, Perlis CS, Wu Y, Hwang C, Joseph M, Nierenberg AA. Industry sponsorship and financial conflict of interest in the reporting of clinical trials in psychiatry. *Am J Psychiatry.* 2005 Oct;162(10):1957–60.
114. Popelut A, Valet F, Fromentin O, Thomas A, Bouchard P. Relationship between sponsorship and failure rate of dental implants: a systematic approach. *PLoS One.* 2010 Apr 21;5(4):e10274.
115. Pouwels XGLV, Ramaekers BLT, Joore MA. Reviewing the quality, health benefit and value for money of chemotherapy and targeted therapy for metastatic breast cancer. *Breast Cancer Res Treat.* 2017 Oct;165(3):485–98.
116. Prakash VS, Mansukhani NA, Helenowski IB, Woodruff TK, Kibbe MR. Sex bias in interventional clinical trials. *J Womens Health (Larchmt).* 2018 Nov;27(11):1342–8.
117. Price-Haywood EG, Harden-Barrios J, Carr C, Reddy L, Bazzano LA, van Driel ML. Patient-reported outcomes in stroke clinical trials 2002-2016: a systematic review. *Qual Life Res.* 2019 May;28(5):1119–28.
118. Printz JO, Lee JJ, Knesek M, Urquhart AG. Conflict of interest in the assessment of hyaluronic acid injections for osteoarthritis of the knee: an updated systematic review. *J Arthroplasty.* 2013 Sep;28(8 Suppl):30-33.e1.
119. Probst P, Knebel P, Grummich K, Tenckhoff S, Ulrich A, Büchler MW, et al. Industry bias in randomized controlled trials in general and abdominal surgery: an empirical study. *Ann Surg.* 2016 Jul;264(1):87–92.
120. Punja S, Shamseer L, Hartling L, Urichuk L, Vandermeer B, Nikles J, et al. Amphetamines for attention deficit hyperactivity disorder (ADHD) in children and adolescents. *Cochrane Database Syst Rev.* 2016 Feb 4;2:CD009996.
121. Putman MS, Harrison Ragle A, Ruderman EM. The quality of randomized controlled trials in high-impact rheumatology journals, 1998-2018. *J Rheumatol.* 2020 Sep 1;47(9):1446–9.
122. Raman S, Moraes FY, Mendez LC, Taunk NK, Suh JH, Souhami L, et al. The relationship of study and authorship characteristics on trial sponsorship and self-reported conflicts of interest among neuro-oncology clinical trials. *J Neurooncol.* 2018 Aug;139(1):195–203.
123. Rasmussen N, Lee K, Bero L. Association of trial registration with the results and conclusions of published trials of new oncology drugs. *Trials.* 2009 Dec 16;10:116.
124. Rattinger G, Bero L. Factors associated with results and conclusions of trials of thiazolidinediones. *PLoS One.* 2009 Jun 8;4(6):e5826.
125. Reda S, Elhennawy K, Meyer-Lückel H, Paris S, Schwendicke F. Industry sponsorship in trials on fluoride varnish or gels for caries prevention. *Community Dent Oral Epidemiol.* 2017 Aug;45(4):289–95.
126. Rees CA, Pica N, Monuteaux MC, Bourgeois FT. Noncompletion and nonpublication of trials studying rare diseases: A cross-sectional analysis. *PLoS Med.* 2019 Nov 21;16(11):e1002966.
127. Ridker PM, Torres J. Reported outcomes in major cardiovascular clinical trials funded by for-profit and not-for-profit organizations: 2000-2005. *JAMA.* 2006 May 17;295(19):2270–4.

128. Rios LP, Oduyungbo A, Moitri MO, Rahman MO, Thabane L. Quality of reporting of randomized controlled trials in general endocrinology literature. *J Clin Endocrinol Metab.* 2008 Oct;93(10):3810–6.
129. Rochon PA, Gurwitz JH, Simms RW, Fortin PR, Felson DT, Minaker KL, et al. A study of manufacturer-supported trials of nonsteroidal anti-inflammatory drugs in the treatment of arthritis. *Arch Intern Med.* 1994 Jan 24;154(2):157–63.
130. Roddick AJ, Chan FTS, Stefaniak JD, Zheng SL. Discontinuation and non-publication of clinical trials in cardiovascular medicine. *Int J Cardiol.* 2017 Oct 1;244:309–15.
131. Roper N, Zhang N, Korenstein D. Industry collaboration and randomized clinical trial design and outcomes. *JAMA Intern Med.* 2014 Oct;174(10):1695–6.
132. Rösner S, Hackl-Herrwerth A, Leucht S, Lehert P, Vecchi S, Soyka M. Acamprosate for alcohol dependence. *Cochrane Database Syst Rev.* 2010 Sep 8;(9):CD004332.
133. Rösner S, Hackl-Herrwerth A, Leucht S, Vecchi S, Srisurapanont M, Soyka M. Opioid antagonists for alcohol dependence. *Cochrane Database Syst Rev.* 2010 Dec 8;(12):CD001867.
134. Saa C, Bunout D, Hirsch S. Industry funding effect on positive results of probiotic use in the management of acute diarrhea: a systematized review. *Eur J Gastroenterol Hepatol.* 2019 Mar;31(3):289–302.
135. Saleh RR, Meti N, Ribnikar D, Goldvaser H, Ocana A, Templeton AJ, et al. Associations between safety, tolerability, and toxicity and the reporting of health-related quality of life in phase III randomized trials in common solid tumors. *Cancer Med.* 2020 Nov;9(21):7888–95.
136. Sendyk DI, Rovai ES, Souza NV, Deboni MCZ, Pannuti CM. Selective outcome reporting in randomized clinical trials of dental implants. *J Clin Periodontol.* 2019 Jul;46(7):758–65.
137. Shepard S, Wise A, Johnson BS, Sajjadi NB, Hartwell M, Vassar M. Are randomized controlled trials in urology being conducted with justification? *J Osteopath Med.* 2021 May 21;121(8):665–71.
138. Silva MA, Duarte GS, Camara R, Rodrigues FB, Fernandes RM, Abreu D, et al. Placebo and nocebo responses in restless legs syndrome: A systematic review and meta-analysis. *Neurology.* 2017 Jun 6;88(23):2216–24.
139. Simonetti RG, Perricone G, Nikolova D, Bjelakovic G, Gluud C. Plasma expanders for people with cirrhosis and large ascites treated with abdominal paracentesis. *Cochrane Database Syst Rev.* 2019 Jun 28;6:CD004039.
140. Sinyor M, Schaffer A, Smart KA, Levitt AJ, Lanctôt KL, Grysman NH. Sponsorship, antidepressant dose, and outcome in major depressive disorder: meta-analysis of randomized controlled trials. *J Clin Psychiatry.* 2012 Feb;73(2):e277-287.
141. Son C, Tavakoli S, Bartanusz V. No publication bias in industry funded clinical trials of degenerative diseases of the spine. *J Clin Neurosci.* 2016 Mar;25:58–61.
142. Spanemberg L, Massuda R, Lovato L, Paim L, Vares EA, Sica da Rocha N, et al. Pharmacological treatment of bipolar depression: qualitative systematic review of double-blind randomized clinical trials. *Psychiatr Q.* 2012 Jun;83(2):161–75.
143. Sriganesh K, Bharadwaj S, Wang M, Abbade LPF, Jin Y, Philip M, et al. Quality of abstracts of randomized control trials in five top pain journals: A systematic survey. *Contemp Clin Trials Commun.* 2017 Sep;7:64–8.
144. Stefaniak JD, Lam TCH, Sim NE, Al-Shahi Salman R, Breen DP. Discontinuation and non-publication of neurodegenerative disease trials: a cross-sectional analysis. *Eur J Neurol.* 2017 Aug;24(8):1071–6.
145. Steffens ANV, Langerhuizen DWG, Doornberg JN, Ring D, Janssen SJ. Emotional tones in scientific writing: comparison of commercially funded studies and non-commercially funded orthopedic studies. *Acta Orthop.* 2021 Apr;92(2):240–3.
146. Sung KH, Chung CY, Lee KM, Lee Y-K, Lee SY, Lee J, et al. Conflict of interest in the assessment of botulinum toxin A injections in patients with cerebral palsy: a systematic review. *J Pediatr Orthop.* 2013 Aug;33(5):494–500.
147. Tibau A, Anguera G, Andrés-Pretel F, Templeton AJ, Seruga B, Barnadas A, et al. Role of cooperative groups and funding source in clinical trials supporting guidelines for systemic therapy of breast cancer. *Oncotarget.* 2018 Mar 13;9(19):15061–7.

148. Trinquart L, Dunn AG, Bourgeois FT. Registration of published randomized trials: a systematic review and meta-analysis. *BMC Med*. 2018 Oct 16;16(1):173.
149. Tulikangas PK, Ayers A, O'Sullivan DM. A meta-analysis comparing trials of antimuscarinic medications funded by industry or not. *BJU Int*. 2006 Aug;98(2):377–80.
150. Tungaraza T, Poole R. Influence of drug company authorship and sponsorship on drug trial outcomes. *Br J Psychiatry*. 2007 Jul;191:82–3.
151. Urrútia G, Ballesteros M, Djulbegovic B, Gich I, Roqué M, Bonfill X. Cancer randomized trials showed that dissemination bias is still a problem to be solved. *J Clin Epidemiol*. 2016 Sep;77:84–90.
152. van den Bogert CA, Souverein PC, Brekelmans CTM, Janssen SWJ, Koëter GH, Leufkens HGM, et al. Primary endpoint discrepancies were found in one in ten clinical drug trials. Results of an inception cohort study. *J Clin Epidemiol*. 2017 Sep;89:199–208.
153. van Heteren JAA, van Beurden I, Peters JPM, Smit AL, Stegeman I. Trial registration, publication rate and characteristics in the research field of otology: A cross-sectional study. *PLoS One*. 2019;14(7):e0219458.
154. van Lent M, Overbeke J, Out HJ. Role of editorial and peer review processes in publication bias: analysis of drug trials submitted to eight medical journals. *PLoS One*. 2014;9(8):e104846.
155. Venincasa MJ, Kuriyan AE, Sridhar J. Effect of funding source on reporting bias in studies of intravitreal anti-vascular endothelial growth factor therapy for retinal vein occlusion. *Acta Ophthalmol*. 2019 Mar;97(2):e296–302.
156. Vlad SC, LaValley MP, McAlindon TE, Felson DT. Glucosamine for pain in osteoarthritis: why do trial results differ? *Arthritis Rheum*. 2007 Jul;56(7):2267–77.
157. Walkup JT. Antidepressant efficacy for depression in children and adolescents: industry- and NIMH-funded studies. *Am J Psychiatry*. 2017 May 1;174(5):430–7.
158. Walter SD, Han H, Guyatt GH, Bassler D, Bhatnagar N, Gloy V, et al. A systematic survey of randomised trials that stopped early for reasons of futility. *BMC Med Res Methodol*. 2020 Jan 16;20(1):10.
159. Waqas A, Baig AA, Khalid MA, Aedma KK, Naveed S. Conflicts of interest and outcomes of clinical trials of antidepressants: an 18-year retrospective study. *J Psychiatr Res*. 2019 Sep;116:83–7.
160. Welsh J, Lu Y, Dhruva SS, Bikdeli B, Desai NR, Benchetrit L, et al. Age of data at the time of publication of contemporary clinical trials. *JAMA Netw Open*. 2018 Aug 3;1(4):e181065.
161. Wise A, Mannem D, Anderson JM, Weaver M, Hartwell M, Vassar M. Do author conflicts of interest and industry sponsorship influence outcomes of systematic reviews and meta-analyses regarding glaucoma interventions? a cross-sectional analysis. *J Glaucoma*. 2021 Apr 1;30(4):293–9.
162. Wong CH, Siah KW, Lo AW. Estimation of clinical trial success rates and related parameters. *Biostatistics*. 2019 Apr 1;20(2):273–86.
163. Wortzel JR, Turner BE, Weeks BT, Fragassi C, Ramos V, Truong T, et al. Trends in mental health clinical research: Characterizing the ClinicalTrials.gov registry from 2007-2018. *PLoS One*. 2020;15(6):e0233996.
164. Xu L, Freeman G, Cowling BJ, Schooling CM. Testosterone therapy and cardiovascular events among men: a systematic review and meta-analysis of placebo-controlled randomized trials. *BMC Med*. 2013 Apr 18;11:108.
165. Yilmaz T, Jutten RJ, Santos CY, Hernandez KA, Snyder PJ. Discontinuation and nonpublication of interventional clinical trials conducted in patients with mild cognitive impairment and Alzheimer's disease. *Alzheimers Dement (N Y)*. 2018;4:161–4.
166. Youssef MA, Abou-Setta AM, Lam WS. Recombinant versus urinary human chorionic gonadotrophin for final oocyte maturation triggering in IVF and ICSI cycles. *Cochrane Database Syst Rev*. 2016 Apr 23;4:CD003719.
167. Zhang J-P, Gallego JA, Robinson DG, Malhotra AK, Kane JM, Correll CU. Efficacy and safety of individual second-generation vs. first-generation antipsychotics in first-episode psychosis: a systematic review and meta-analysis. *Int J Neuropsychopharmacol*. 2013 Jul;16(6):1205–18.

# BMJ Open

## Evidence for Stratified Conflicts of Interest Policies in Research Contexts: A Methodological Review

|                                 |                                                                                                                                                                                                                                                                                                                                                                                                                                                                                                      |
|---------------------------------|------------------------------------------------------------------------------------------------------------------------------------------------------------------------------------------------------------------------------------------------------------------------------------------------------------------------------------------------------------------------------------------------------------------------------------------------------------------------------------------------------|
| Journal:                        | <i>BMJ Open</i>                                                                                                                                                                                                                                                                                                                                                                                                                                                                                      |
| Manuscript ID                   | bmjopen-2022-063501.R1                                                                                                                                                                                                                                                                                                                                                                                                                                                                               |
| Article Type:                   | Original research                                                                                                                                                                                                                                                                                                                                                                                                                                                                                    |
| Date Submitted by the Author:   | 14-Jul-2022                                                                                                                                                                                                                                                                                                                                                                                                                                                                                          |
| Complete List of Authors:       | Graham, Scott; University of Texas at Austin, Rhetoric & Writing<br>Karnes, Martha S.; The University of Texas at Austin, Department of English<br>Jensen, Jared T.; The University of Texas at Austin<br>Sharma, Nandini; The University of Texas at Austin<br>Barbour, Joshua B.; The University of Texas at Austin<br>Majdik, Zoltan; North Dakota State University, Communication<br>Rousseau, Justin F.; The University of Texas at Austin Dell Medical School, Population Health and Neurology |
| <b>Primary Subject Heading</b>: | Ethics                                                                                                                                                                                                                                                                                                                                                                                                                                                                                               |
| Secondary Subject Heading:      | Health policy, Research methods                                                                                                                                                                                                                                                                                                                                                                                                                                                                      |
| Keywords:                       | Health policy < HEALTH SERVICES ADMINISTRATION & MANAGEMENT, STATISTICS & RESEARCH METHODS, ETHICS (see Medical Ethics), Protocols & guidelines < HEALTH SERVICES ADMINISTRATION & MANAGEMENT, Risk management < HEALTH SERVICES ADMINISTRATION & MANAGEMENT                                                                                                                                                                                                                                         |
|                                 |                                                                                                                                                                                                                                                                                                                                                                                                                                                                                                      |

SCHOLARONE™  
Manuscripts





I, the Submitting Author has the right to grant and does grant on behalf of all authors of the Work (as defined in the below author licence), an exclusive licence and/or a non-exclusive licence for contributions from authors who are: i) UK Crown employees; ii) where BMJ has agreed a CC-BY licence shall apply, and/or iii) in accordance with the terms applicable for US Federal Government officers or employees acting as part of their official duties; on a worldwide, perpetual, irrevocable, royalty-free basis to BMJ Publishing Group Ltd ("BMJ") its licensees and where the relevant Journal is co-owned by BMJ to the co-owners of the Journal, to publish the Work in this journal and any other BMJ products and to exploit all rights, as set out in our [licence](#).

The Submitting Author accepts and understands that any supply made under these terms is made by BMJ to the Submitting Author unless you are acting as an employee on behalf of your employer or a postgraduate student of an affiliated institution which is paying any applicable article publishing charge ("APC") for Open Access articles. Where the Submitting Author wishes to make the Work available on an Open Access basis (and intends to pay the relevant APC), the terms of reuse of such Open Access shall be governed by a Creative Commons licence – details of these licences and which [Creative Commons](#) licence will apply to this Work are set out in our licence referred to above.

Other than as permitted in any relevant BMJ Author's Self Archiving Policies, I confirm this Work has not been accepted for publication elsewhere, is not being considered for publication elsewhere and does not duplicate material already published. I confirm all authors consent to publication of this Work and authorise the granting of this licence.

# Evidence for Stratified Conflicts of Interest Policies in Research Contexts: A Methodological Review

S. Scott Graham,<sup>1</sup> Martha S. Karnes,<sup>1</sup> Jared T. Jensen,<sup>1</sup> Nandini Sharma,<sup>1</sup> Joshua B. Barbour,<sup>1</sup> Zoltan P. Majdik,<sup>2</sup> and Justin F. Rousseau<sup>3</sup>

1) The University of Texas at Austin, 2) North Dakota State University, 3) The Dell Medical School at The University of Texas at Austin

Correspondence to Dr. S Scott Graham; [ssg@utexas.edu](mailto:ssg@utexas.edu).

## Abstract

**Objectives:** The purpose of this study was to conduct a methodological review of research on the effects of conflicts of interest (COI) in research contexts.

**Design:** Methodological review.

**Methods:** We searched OVID for studies published between 1986 and 2021 conducting quantitative assessments of relationships between industry funding or COI and four target outcomes: positive study results, evidence of methodological biases, study reporting quality, and results-conclusions concordance. We assessed included articles for key research design features. Our primary analysis identified whether studies stratified industry funding or COI variables by magnitude (i.e., number of COI or disbursement amount), and/or type (industry employment, travel fees, speaking fees) or if they were operationalized as dichotomous. Secondary analyses focused on target outcomes and available effects measures.

**Results:** Of the 167 articles included in this study, a substantial majority (98.2%) evaluated the effects of industry sponsorship. None of the collected articles evaluated any associations between funding magnitude and outcomes of interest. Seven studies (4.3%) stratified industry funding based on the mechanism of disbursement or funder relationship to product (manufacturer or competitor). A fifth of the articles (19.8%) assessed the effects of author COI on target outcomes. None evaluated COI magnitude, and 3 studies (9.1%) stratified COI by disbursement type and/or reporting practices. Participation of an industry-employed author showed the most consistent effect on favorability of results across studies.

**Conclusions:** Substantial evidence demonstrates that industry funding and COI can bias biomedical research. Evidence-based policies are essential for mitigating the risks associated with COI. Although most policies stratify guidelines, distinguishing among COIs based on the type of relationship or monetary value, this review shows that the available research has generally not been designed to assess the differential risks of COI types or magnitudes. Targeted research is necessary to establish an evidence base that can effectively inform policy.

## Strengths and limitations of this study

- We considered a broad range of available research on the effects of industry funding and COI on biomedical research.
- Our analysis of common research designs demonstrates a significant need for new approaches to research on the effects of industry funding and COI.
- We achieved high inter-rater reliability for article screening.
- This methodological review evaluates research on the relationships between industry funding or author COI and biomedical research. It does not address studies of the relationships between industry funding or COI and guidelines development, regulatory decision-making, or clinical practice.

For peer review only

## Background

Substantial evidence indicates that industry funding of biomedical research and author financial conflicts of interest (COI) arising from financial relationships with medically-related industry can bias research results.[1–7] Associations between industry funding or COI and positive outcomes, such as results favorable to the sponsor, are the most well documented.[2–5,7] Available evidence indicates that industry-funded trials can be up to 5.4 times more likely to return positive results than trials not sponsored by industry,[8] and trials with author COI may be as much as 8.4 times more likely to return favorable results when compared to those without author COI.[6] Additional research has demonstrated that industry funding and COI may be associated with reduced drug and device safety[6,9] and can have adverse effects on the methodological quality of clinical trials.[10–12] Recent studies also suggests that industry sponsorship may be associated with premature trial termination and non-reporting of trial results.[13,14] Calls for more evidence documenting that industry funding and COI can measurably bias biomedical research persist even though these findings have been repeatedly replicated.[15]

Recognizing the risks of bias, many organizations involved in biomedical research have adopted specific policies designed to address COI. The need for such policies is clear, which in turn raises important questions about the form those policies should take. Differentiation among COI types and magnitudes is a common feature of the policies adopted by universities, academic medical centers (AMCs), government laboratories, and similar research institutions. COI policy guidelines published in the literature and by professional medical organizations also routinely differentiate among different COI types and magnitudes. That is, COI policies and guidelines routinely make distinctions based on the method of remuneration (industry employment, consultancy relationships, honoraria, travel fees, etc.), the nature of the funder (e.g., industry,

1  
2  
3 nonprofit, government agency), the recipient of remuneration (e.g., self, partner, family,  
4 collaborator), and the magnitude or monetary value of the disbursement. Table 1 describes  
5 explicit recommendations by the American Medical Student Association (AMSA),[16] the  
6 Association of Academic Medical Centers (AAMC),[17] the British Medical Association  
7 (BMA),[18] and Brennen et al.[19]

14  
15 These COI policies and guidelines suggest that some types of COI should be prohibited  
16 outright, others should be subjected to specific restrictions, and some should merely require  
17 disclosure. However, different policies and guidelines do not agree on the risk presented by  
18 different types or magnitudes of COI. The recommendations typically advise a total prohibition  
19 on gifts from industry and ghostwriting, but recommendations about other COI types vary  
20 widely. For example, AMSA recommends restrictions on consulting fees, but the AAMC, BMA,  
21 and Brennen et al. do not address consultancies outside general recommendations for  
22 transparency via COI disclosure. All four guidelines disagree if industry representative access to  
23 research spaces should be restricted or prohibited outright.

34  
35 Various policies also make distinctions about the magnitude or monetary value of COI to  
36 set disclosure thresholds. However, recommended thresholds vary widely within and between  
37 organizations. For example, since 1995, the US Department of Health and Human Services has  
38 required AMCs and other entities that receive federal research funding to adopt policies that  
39 require disclosure of COI over a certain threshold.[20] This value was lowered from \$10,000 to  
40 \$5,000 in 2011.[21] The BMA sets the declaration threshold for gifts at £500 and for equity  
41 holdings at greater than 1% of the value of the company or greater than £25,000.[18]

---

| COI | AMSA | AAMC | BMA | Brennen et al. |
|-----|------|------|-----|----------------|
|-----|------|------|-----|----------------|

---

For peer review only

|                                                      |          |          |          |          |
|------------------------------------------------------|----------|----------|----------|----------|
| Attendance at unaccredited industry-sponsored events | Prohibit |          |          | Prohibit |
| Consulting                                           | Restrict |          |          |          |
| Donations                                            |          |          | Disclose |          |
| Ghostwriting                                         | Prohibit | Prohibit |          | Prohibit |
| Gifts                                                | Prohibit | Prohibit | Prohibit | Prohibit |
| Grants                                               |          |          | Disclose |          |
| Industry access- device representatives              | Restrict | Restrict |          | Restrict |
| Industry access- pharmaceutical representatives      | Prohibit | Restrict | Restrict | Prohibit |
| Industry sponsored CME                               | Restrict | Restrict |          | Restrict |
| Industry sponsored scholarships                      |          | Restrict |          |          |
| Meals                                                | Prohibit |          |          | Prohibit |
| Pharmaceutical samples                               |          | Restrict |          |          |
| Research contracts                                   |          |          | Disclose |          |
| Speakers bureaus                                     | Prohibit |          |          | Prohibit |
| Travel funds                                         |          | Restrict |          |          |
| Travel for industry sponsored meetings               |          | Prohibit |          |          |
| Travel funds for trainees                            | Prohibit |          | Prohibit | Prohibit |
| Treatment inducements                                | Prohibit |          |          |          |

**Table 1: Illustrative Recommendations for Strata-Specific COI Policies.** This table shows AMSA,[16] AAMC,[17] BMA,[18] and Brennen et al.'s[19] recommendations for whether AMC COI policies should prohibit, restrict, or require disclosure of specific COI strata. Where entries are blank, the guidance provided no specific recommendations for that type of relationship.

The establishment of approaches to COI management that differentiate by type magnitude COI indicate that common guidance *assumes* that different COI types and magnitudes carry different degrees of risk for biomedical research and require different responses. This assumption even drives much of the available research on COI policies at AMCs and similar institutions. The AMSA scorecard, for example, is a well-established framework for COI policy evaluation.[16,22] It has been used to assess the extent to which COI policies at AMCs in the

1  
2  
3 United States,[16] France,[23] and Germany [24] follow AMSA recommendations for COI policy  
4 construction and stratification.  
5  
6

7  
8 Despite the significant investments in developing and evaluating stratified COI policies,  
9  
10 it is not clear that different types of COI do, in fact, carry different risks or levels of risk for  
11  
12 biomedical research. If one were to assess the efficacy of COI policies (i.e., determine if COI  
13  
14 policies have any effects on the quality of research), one must first assess whether policies  
15  
16 stratified by COI types are grounded in evidence about the differential risks of different COI  
17  
18 types. This study sought to assess the extent to which orthodox research designs for assessing the  
19  
20 effects of COI on biomedical research have been designed to generate evidence relevant to the  
21  
22 stratification of COI policies. Demonstrating the existence of differential risk profiles for  
23  
24 different COI types would require, at minimum, research designs that stratify COI variables prior  
25  
26 to analysis. They should further disaggregate industry research sponsorship generally from  
27  
28 specific forms of author COI. Therefore, the goal of this methodological review is to evaluate the  
29  
30 extent to which study designs in available industry funding and COI research can support COI  
31  
32 policies or that policy recommendations should assume differential risk profiles for different  
33  
34 types of COI and/or different monetary values. Put another way, the evidence for the need for  
35  
36 mitigating the risks imposed by COI is strong, but the state of the research that can guide *how* to  
37  
38 manage that risk is unclear. This study reviews methodological designs for 1) industry funding  
39  
40 variable stratification and disaggregation, 2) COI variable stratification and disaggregation, and  
41  
42 3) diversity of outcomes assessments.  
43  
44  
45  
46  
47  
48  
49

## 50 51 Methods

52 Methodological reviews are designed to provide information on the prevalence of  
53  
54 available study designs in a body of literature. They have facilitated advances in a wide variety  
55  
56  
57



1  
2  
3 of health and health policy contexts and can be used to identify and prioritize new pathways for  
4 research [25–28]. A methodological review is the ideal approach for this study, which requires  
5 identifying the extent to which assessments the effects of industry funding and COI on  
6 biomedical research were conducted in such a way that could support current COI policy  
7 stratifications. Our review proceeded in three phases. First, we replicated the search strategy and  
8 article screening protocol for a previously published Cochrane systematic review of the effects of  
9 industry funding and author COI on biomedical research.[2] The prior Cochrane review  
10 evaluated the overall strength of the evidence base regarding the association of industry funding  
11 and author COI with results favorable to the sponsor, risks of bias associated with the  
12 methodological design, and the quality of reporting of the concordance between results and  
13 conclusions, but it did not document the methodological design elements in focus in this  
14 study.[2] Our study adopted the search strategy and screening protocol of the original review,  
15 and the second phase of this review involved conducting a novel assessment of the  
16 methodological features of included articles, with particular focus on how industry funding and  
17 COI variables were operationalized in statistical analyses. Finally, we used these data to  
18 synthesize the evidence for evaluating different types of industry funding or author COI on target  
19 outcomes in biomedical research.  
20  
21  
22  
23  
24  
25  
26  
27  
28  
29  
30  
31  
32  
33  
34  
35  
36  
37  
38  
39  
40  
41  
42  
43

#### 44 **Search strategy and study selection**

45 We began by replicating the search strategy in a previously published Cochrane review.  
46 The strategy was designed to identify relevant articles indexed in the Ovid database. The original  
47 review and screening protocol identified 75 studies of interest published between 1986 and 2016.  
48 We retrieved each of the original 75 studies, and in June 2021, we repeated the search strategy to  
49 collect additional relevant articles published since 2016. We also replicated the study inclusion  
50  
51  
52  
53  
54  
55  
56  
57  
58  
59  
60

1  
2  
3 protocol from the previous Cochrane review. Specifically, eligible studies provided a  
4  
5 quantitative assessment of the extent to which industry funding or author COI were associated  
6  
7 with target outcomes of interest (i.e., results favorable to industry, methodological biases,  
8  
9 reporting quality, and results-conclusions concordance) within research on drug and device  
10  
11 products. All collected studies evaluated one of these outcomes on a dataset of clinical trials.  
12  
13 Clinical trials data may come from published articles, clinical trials registries, or both. Studies of  
14  
15 the effects of industry funding and/or COI in research areas related to smoking, nutrition,  
16  
17 physical therapy, psychotherapy, and surgery were excluded except in cases where analyses were  
18  
19 performed on separate identifiable drug or device data. Additionally, studies that evaluated the  
20  
21 effects of industry funding or COI on clinical practices, guidelines development, patient  
22  
23 organizations, and regulatory policy were excluded.  
24  
25  
26  
27

28  
29 Three evaluators screened titles and abstracts. After initial norming, a random sample of  
30  
31 255 titles and abstracts were selected by all three raters to assess reliability across screeners. A  
32  
33 sample size of 255 was chosen to achieve 90% assurance using the intraclass correlation  
34  
35 coefficient (ICC).[29] Overall agreement between the three raters was 94.9% with an ICC =  
36  
37 0.801. A secondary analysis of the random sample indicated that the abstracts for all articles  
38  
39 selected for further screening included at least one of the following terms: “funding,” “funded,”  
40  
41 “COI,” “fCOI,” “conflict,” or “sponsor,” which allowed us to develop an automated screening  
42  
43 tool based on those terms. Articles selected for full-text review passed both automated and  
44  
45 manual screening. The full article text of the remaining articles was evaluated by three raters.  
46  
47  
48  
49

## 50 51 **Data Extraction and Synthesis**

52  
53 The current methodological review was designed to collect data on the underlying  
54  
55 analytic designs in selected articles. Specifically, the investigators collected data on which  
56  
57

1  
2  
3 independent and dependent variables had been operationalized and defined. That is, each  
4 industry funding and COI independent variable was categorized as “stratified,” “unstratified,” or  
5 “magnitude.” Here, “stratified,” refers to what is often called categorical or nominal variables.  
6  
7 For example, a study that stratified industry funding variables might assess if funding provided  
8 by a drug manufacturer or a competing pharmaceuticals company has differential impacts on  
9 target outcomes. Similarly, a study that stratified a COI variable might evaluate the relative  
10 impact of different disclosed COI types such as “industry employed author,” “receipt of  
11 consulting fees,” or “receipt of travel fees.” We classified independent variables as “magnitude”  
12 if they assessed industry funding or COI as a continuous or ordinal variable. This might mean  
13 assessing industry funding in terms of disbursed amounts (e.g., \$5000 or £20,000) or the total  
14 number of COI per article. Relevant variables were identified as “unstratified” when they were  
15 assessed as simply present or absent (e.g., industry funded vs. non-industry funded or reported  
16 COI vs. no reported COI). We also noted if variables had been dichotomized prior to analysis.  
17  
18 This occurs when articles present stratified variable data as part of descriptive statistics, but then  
19 perform statistical analyses on simplified, unstratified, dichotomous industry funding or COI  
20 variables.

21  
22 Our analysis also assessed whether author COI was used as a proxy for industry funding.  
23 This research design choice would indicate that the article in question did not fully disaggregate  
24 general industry sponsorship from specific types of author COI. Each outcome variable was also  
25 categorized according to the primary domain of interest, including outcome favorability to  
26 sponsor, drug or device safety; quality of study design or reporting; and if results were reported  
27 at all. Finally, for all articles with stratified independent variables for industry funding or author  
28 COI, we identified clinical areas of interest, sample sizes used, each assessed stratum, outcomes

1  
2  
3 against which the stratum were assessed, significance of the results, and any reported effect  
4  
5 sizes. A complete description of the criteria is available in Supplemental Table 1.  
6  
7

## 8 9 **Patients and Public Involvement**

10 No patients or public were involved in the study.  
11  
12

## 13 14 **Results**

15 Our replication of the previously published search strategy retrieved 3,884 unique records  
16  
17 for articles published in 2016 and later. Automated screening removed 2,671 articles from  
18  
19 consideration. Subsequent manual screening of titles and abstracts excluded another 926 articles.  
20  
21 The remaining 287 articles were selected for full text review, and 92 studies were ultimately  
22  
23 selected for inclusion. An additional 75 articles were included from the preexisting systematic  
24  
25 review for a dataset of 167 articles. (See Figure 1.)  
26  
27  
28  
29  
30

### 31 **Industry Funding Variable Assessment**

32 Of the 167 articles included in this study, a substantial majority (n = 164, 98.2%)  
33  
34 evaluated the effects of industry sponsorship (See Supplemental Table 2). In most cases, industry  
35  
36 funding was determined based on an article's acknowledgements or sponsorship declaration.  
37  
38 However, some studies collected data from clinical trials registries like clinicaltrials.gov, which  
39  
40 index sponsorship. Notably, thirty-five studies (21.3%) assessing industry funding used author  
41  
42 employment in industry or other author COI as part of the inclusion criteria for a variable  
43  
44 identified as "industry funding" or "industry sponsorship." Studies also used industry provision  
45  
46 of drugs or devices as a criterion for industry funding. Others treated provision of supplies as its  
47  
48 own isolated variable.  
49  
50  
51  
52  
53  
54  
55  
56  
57  
58  
59  
60

1  
2  
3           Among the articles that assessed industry funding in some form, none evaluated  
4  
5 associations between funding magnitude and outcomes of interest. Ten studies (6.1%) collected  
6  
7 stratified data on industry funding but dichotomized the variable prior to statistical analysis. Only  
8  
9 seven studies (4.3%) stratified industry funding for analysis in any way. Evaluated strata  
10  
11 included details about the nature of the sponsor (evaluated drug manufacturer vs. competitor  
12  
13 company) or the nature of the sponsorship (full study sponsorship, collaborative sponsorship  
14  
15 with other funders, or provision of medications). Three of the seven studies included assessed  
16  
17 differences in favorable outcomes based on funder relationship to the product evaluated (e.g.,  
18  
19 manufacturer vs. competitor company).[30–32] Only one study found significant results:[30] This  
20  
21 review of 542 psychiatry studies found that a greater percentage of studies sponsored by the drug  
22  
23 manufacturer have positive outcomes than those not sponsored by a pharmaceutical company  
24  
25 (78% vs 48%), and that research sponsored by a competitor had the lowest rate of favorable  
26  
27 findings (28%). Pairwise comparisons between manufacturer-funded or competitor-funded and  
28  
29 non-industry-funded studies were significantly different, but the study reported no indicators of  
30  
31 effect size. Three studies evaluated strata related to the mode of industry involvement.[33–35]  
32  
33 These studies assessed the relationship between favorable outcomes and industry provision of  
34  
35 medication, report of findings in an industry publication venue, and other (unspecified) industry  
36  
37 involvement. One study found significant results, and reported that “other” industry involvement  
38  
39 associates with favorable outcomes for industry.[35] See Table 2 for further details. In sum, a  
40  
41 substantial proportion of the research that might provide insight into COI policy design assesses  
42  
43 only industry sponsorship generally. Nearly a quarter of the assessed studies conflate industry  
44  
45 funding and COI variables making it impossible for results to shed light on potentially useful  
46  
47  
48  
49  
50  
51  
52  
53  
54  
55  
56  
57  
58  
59  
60

1  
2  
3 policy differences. And, finally, studies of industry funding that do stratify variables primarily  
4  
5 provide insight on different sponsorship modalities and not on issues related to author COI.  
6  
7

### 8 9 **COI Variable Assessment**

10 Of the 167 articles evaluated, only 33 (19.8%) assessed COI as a discrete variable.  
11  
12 Attention to COI began considerably later in the dataset, not appearing until 2005. Most studies  
13  
14 that evaluated author COI relied on the data in the published disclosure statement. A handful of  
15  
16 studies used the authors institutional affiliation as an indicator of industry employment, and a  
17  
18 few studies also compared disclosure statements to data available in the Open Payments  
19  
20 Database. Of the articles that evaluated author COI, none assessed COI magnitude, and only 3  
21  
22 studies (9.1%) stratified COI for analysis. Four studies (12.1%) collected stratified COI data but  
23  
24 dichotomized it prior to analysis. The few studies that assessed COI strata independently tended  
25  
26 to evaluate disclosure practices as opposed to COI types.[36–38] These articles report on  
27  
28 evaluations of the relationship between favorable outcomes or methodological quality and COI  
29  
30 disclosure, lack of funding disclosure, incomplete disclosure, lack of disclosure requirements by  
31  
32 journal, or affirmative statements of no author COI. Disclosure of COI and “full” disclosure of  
33  
34 COI were most strongly associated with results favorable to industry.[37,38] Here “full”  
35  
36 disclosure meant that all payments reported to the Open Payments Database were reflected in  
37  
38 published disclosure statements. Assessments of these different disclosure practices returned  
39  
40 non-significant results or smaller effect sizes. Two studies evaluated the relationship between  
41  
42 participation of industry-employed authors and results favorable to industry.[33,34] An  
43  
44 evaluation of 215 psychiatric studies published between 1998 and 2003 found that participation  
45  
46 of industry authors was significantly associated with favorable outcomes.[33] Similarly, an  
47  
48  
49  
50  
51  
52  
53  
54  
55  
56  
57  
58  
59  
60

assessment of 91 asthma product studies found that favorable outcomes were more likely for studies with industry-employed authors.[34] (See Table 2.)

| Article        | Area               | Samp. | Outcome              | Strata                                   | Sig.   | Effect Measure | Effect              |
|----------------|--------------------|-------|----------------------|------------------------------------------|--------|----------------|---------------------|
| Ahmer 2005     | psychiatry         | 306   | Outcome Favorability | Industry Provided Medications            | 0.053  | -              | -                   |
|                |                    |       |                      | Author is Industry Employee              | 0.01*  | OR             | 8.33 (1.64-50.0)    |
| Bartels 2012   | spine research     | 51    | Outcome Favorability | Disclosed COI                            | <0.05* | OR             | 16.5 (4.7-58.1)     |
|                |                    |       |                      | Statement of No COI                      | -      | -              | -                   |
|                |                    |       |                      | Disclosure Not Required by Journal       | -      | -              | -                   |
| Bond 2012      | asthma             | 91    | Outcome Favorability | Industry Sponsorship                     | 0.546  | -              | -                   |
|                |                    |       |                      | Industry Publication Venue               | 0.191  | -              | -                   |
|                |                    |       |                      | Other Industry Involvement               | NR     | -              | -                   |
|                |                    |       |                      | Author is Industry Employee              | 0.003* | RR             | 1.42 (1.10-1.82)    |
| Jinapriya 2011 | latanoprost        | 44    | Outcome Favorability | Sponsorship by Parent Company            | 0.53   | -              | -                   |
|                |                    |       |                      | Sponsorship by Competing Company         | 0.53   | -              | -                   |
| Kelly 2006     | psychiatry         | 542   | Outcome Favorability | Sponsorship by Manufacturer              | 0.001* | -              | -                   |
|                |                    |       |                      | Sponsorship by Competing Company         | 0.001* | -              | -                   |
| Rattinger 2009 | Thiazolidinediones | 61    | Outcome Favorability | Sponsorship by Manufacturer              | 0.7778 | -              | -                   |
|                |                    |       |                      | Sponsorship by Competing Company         | 0.037* | OR             | 0(0,0.886)          |
|                |                    |       |                      | No Funding Disclosure                    | 0.4153 | -              | -                   |
|                |                    |       |                      | Corresponding Author COI                 | 0.3939 | -              | -                   |
|                |                    |       |                      | Corresponding Author is Sponsor Employee | 0.5714 | -              | -                   |
|                |                    |       |                      | Corresponding Author No Disclosure       | 0.4388 | -              | -                   |
|                |                    |       |                      | Corresponding Author COI with sponsor    | 0.049* | OR             | 4.125(1.048;19.525) |
|                |                    |       |                      | First Author COI                         | 0.1667 | -              | -                   |
|                |                    |       |                      | First Author is Sponsor Employee         | -      | -              | -                   |
|                |                    |       |                      | First Author No Disclosure               | -      | -              | -                   |
| Vlad 2007      | osteoarthritis     | 15    | Outcome              | Industry Sponsorship                     | 0.05   | -              | -                   |

|             |            |     |                                     |                                      |        |                |                      |
|-------------|------------|-----|-------------------------------------|--------------------------------------|--------|----------------|----------------------|
|             |            |     | Favorability                        | Other Industry Involvement           | 0.02*  | random effects | 0.55<br>(0.29-0.81)  |
|             |            |     |                                     | Author COI                           | 0.04*  | random effects | 0.55<br>(0.27-0.84)  |
| Cherla 2018 | multiple   | 590 | Outcome Favorability                | Full Disclosure                      | 0.001* | OR             | 8.65<br>(2.46-30.44) |
|             |            |     |                                     | Incomplete Industry Disclosure       | 0.003* | OR             | 3.61<br>(1.53-8.51)  |
|             |            |     |                                     | Incomplete Self-Disclosure (Partial) | 0.004* | OR             | 4.14<br>(1.58-10.82) |
|             |            |     |                                     | Incomplete Self-Disclosure (None)    | 0.002* | OR             | 0.14<br>(0.37-1.15)  |
| Saa 2018    | probiotics | 66  | Outcome Favorability                | Industry sponsorship                 | 0.491  | -              | -                    |
|             |            |     |                                     | Non-Disclosure of Sponsorship        | 0.491  | -              | -                    |
|             |            |     | Methodological or Reporting Quality | Industry Sponsorship                 | 0.491  | -              | -                    |
|             |            |     |                                     | Non-Disclosure of Sponsorship        | 0.491  | -              | -                    |

**Table 2: Industry funding and COI Strata Assessed and Associated Results.** This table describes the clinical area, methodological design (sample, outcome, variable strata), and results of analysis presented in articles that evaluated identifiable industry funding and COI strata.

### Target Outcomes Evaluation

Most studies in the dataset (n = 108, 64.7%) evaluated the relationship between industry funding or COI and outcomes favorability for sponsors. Sixty-six (39.5%) evaluated methodological or reporting quality. Nineteen (11.4%) assessed reporting of results, and 15 (9.0%) evaluated drug or device safety. Attention to specific outcomes appears to have changed over time. Industry favorability of study outcomes had long been the dominant focus of research on industry funding and COI. Quality, safety, and reporting grew increasingly prevalent (Figure 2). Importantly, however, studies that stratified industry funding or COI variables were less diverse in their target outcomes. Of the 10 studies that stratified relevant variables, outcomes favorability to industry was assessed in all cases. One study also assessed the relationship between disclosure practices and methodological or reporting quality.[36]



## Discussion

For COI policies to make effective distinctions based on nature of relationships or amount of remuneration, these distinctions must be grounded in research that assesses differential risk profiles of COI types and magnitudes. However, a substantial majority of research assessing the effects of industry funding and author COI on biomedical research does not stratify relevant variables. Remarkably, *zero* studies included in this review conducted any assessments of the magnitude of either industry funding or author COI. Additionally, the available literature's ability to support evidence-based stratifications in COI policies is further compromised by regular conflation of industry sponsorship and author COI variables as well as the practice of dichotomizing variables prior to conducting statistical analyses. The few studies that did stratify COI variables tended to focus on disclosure practices rather than COI types, and most studies assess only if COI types associated with results favorable to industry and not if they associated with other target outcomes of interest. The results of this methodological review indicate that the available research on industry funding and COI has generally not been designed to guide COI policy stratifications or the establishment of disclosure thresholds.

Appropriate and evidence-based COI policies are essential for safeguarding the integrity of the biomedical research enterprise. Therefore, it is critical that research can meaningfully inform continued policy refinement. Clearly, guiding the design of COI policy requires additional research designed to assess the differential risks associated with various COI types and magnitudes.

Furthermore, research in this area could also be better supported by the development of standardized taxonomies of industry funding and/or author COI. Since the literature variously defines "industry funding" as sponsorship, employment, provision of medications, or any author COI, it is quite difficult to compare and aggregate findings across studies. Likewise, competing

1  
2  
3 understandings of author COI based in different disclosure practices and type definitions also  
4  
5 indicate the strong need for robust taxonomies that can guide future research.  
6

7  
8         These taxonomies combined with evidence about the magnitude of COIs would allow for  
9  
10 computation and aggregation of COIs essential for supporting research that could effectively  
11  
12 guide COI policy refinement. New research on the risks of COI would also benefit from  
13  
14 continued diversification of outcomes assessment. Recent years have seen a steady expansion of  
15  
16 outcomes of interest (e.g., outcomes favorability giving way to more assessments of quality,  
17  
18 safety, and reporting practices), but favorability of results is still the overwhelmingly dominant  
19  
20 target outcome.  
21  
22

23  
24         Finally, the results of this review also suggest that researchers and policymakers would  
25  
26 benefit from considering COI risks beyond those manageable at the individual researcher level. It  
27  
28 is notable that common COI policies and guidelines tend to be strict with respect to relationships  
29  
30 of modest economic benefit to individuals (e.g., meals and travel) whereas relationships with  
31  
32 well-documented risks but considerable economic benefit to institutions (e.g., industry grants and  
33  
34 collaborations) are largely left out of COI policy recommendations. Furthermore, the strongest  
35  
36 evidence relates to author employment in industry, although specific instructions about  
37  
38 disclosing employment have been removed from the latest ICMJE disclosure guidance. Given  
39  
40 that collaborations with industry are a common form of institutional COI, and one not addressed  
41  
42 by individualized COI policies, these findings support recent calls for greater attention to  
43  
44 institutional COI at institutions that conduct biomedical research.[39–42] Research conducted  
45  
46 primarily at universities, AMCs, and other research institutions may be more prone to bias when  
47  
48 it is supported by industry funding or industry collaboration. COI policies that focus on  
49  
50 individual researchers alone will not mitigate against these risks.  
51  
52  
53  
54  
55  
56  
57

1  
2  
3 This study has several limitations that should inform the reading of the findings. Our  
4 review evaluates the methodological design and approaches to variable stratification for studies  
5 of the relationships between industry funding or author COI and four specified outcomes of  
6 interest in biomedical research. Although we are aware of studies that evaluate COI magnitude,  
7 for example, they were not returned by our search strategy either because they treat COI  
8 magnitude in the aggregate[43] or because they assess non-target outcomes such as associations  
9 with commercial publishing practices.[44] Additionally, AMC guidelines are designed to respond  
10 to COI risks in multiple domains including research, clinical practice, and medical education. We  
11 assume that COI strata related to industry-funded continuing medical education or  
12 pharmaceutical representative access to AMCs are designed primarily to address risks of bias  
13 associated with medical education and clinical practice. Additional research not covered by this  
14 review is available that evaluates the relationships of industry funding and COI with prescription  
15 practices, guidelines development, and policy decision-making.  
16  
17  
18  
19  
20  
21  
22  
23  
24  
25  
26  
27  
28  
29  
30  
31  
32

33 These limitations notwithstanding, the results suggest that policies designed to address  
34 COI risks associated with clinical practice may not effectively safeguard the integrity of  
35 biomedical research across institutional contexts because of the gap between policy and available  
36 COI research. Furthermore, it is possible that a one-size-fits-all COI policy may not be  
37 appropriate. Additional efforts should be made to ensure that COI policies are responsive to risks  
38 associated with bias in biomedical research. For example, AMCs should potentially consider  
39 differential policies based on institutional roles. Future research might, therefore, investigate the  
40 utility of separate COI policies for clinical, educational, and research staff as well as staff  
41 holding multiple roles. In such cases, it might be appropriate to require staff to adhere to the  
42 most restrictive policy. COI policies should be developed based on an understanding of the  
43  
44  
45  
46  
47  
48  
49  
50  
51  
52  
53  
54  
55  
56  
57  
58  
59  
60

1  
2  
3 differential effects of distinct strata and magnitudes of COI on outcomes across the multiple  
4  
5 domains.  
6  
7

## 8 9 Conclusion

10 Current COI policies in research contexts devote considerable attention to distinguishing  
11  
12 between different types and magnitudes of COI. Although substantial evidence exists that  
13  
14 industry funding and COI have adverse effects on biomedical research, the current evidence  
15  
16 cannot guide policy stratification by type or magnitude. Given the broad adoption of policies that  
17  
18 distinguish between COI types and set disclosure thresholds, the shortcomings identified here are  
19  
20 weaknesses of current research that must be addressed. Importantly, however, we are not calling  
21  
22 for a suspension of COI policies while this research is conducted. Inaccurate claims to  
23  
24 insufficient evidence have long served to limit the scope of COI policies and to delay  
25  
26 adoption.[15] A precautionary approach would involve adopting more restrictive unstratified  
27  
28 policies until such time that certain COI types are demonstrated to be of lower risk. Furthermore,  
29  
30 our findings also suggests that these problematic claims may have adversely affected COI  
31  
32 research itself. Unspecified calls for “more research” might partially explain why, despite the  
33  
34 clear findings of the 2017 meta-study [2], so many studies continue to assess if COI has an effect  
35  
36 rather than which COI have what effects and why. Instead of suggesting the need for more COI  
37  
38 research broadly, the current methodological review points towards targeted research needs  
39  
40 about COI types and magnitudes. If stratified policies at research institutions are to mitigate the  
41  
42 risks of COI, they must be based on comparative assessments of differential risks.  
43  
44  
45  
46  
47  
48  
49  
50  
51  
52  
53  
54  
55  
56  
57  
58  
59  
60

**Data Availability Statement:** All data relevant to the study are included in the article or uploaded as supplementary information.

**Ethics Approval:** This study did not require ethics approval as it did not involve human subjects.

**Funding:** This work was funded by the National Institute of General Medical Sciences of the National Institutes of Health under Award Number R01GM141476. The content is solely the responsibility of the authors and does not necessarily represent the official views of the National Institutes of Health.

**Contributors:** SSG designed the study, coordinated the study, and is the guarantor. SSG, JBB, and JFR executed the search strategy and screened abstracts. SSG, MSK, JJ, and NS collected the data. SSG, JBB, JFR, and ZPM analyzed the data. SSG, MSK, and NS drafted the manuscript. SSG, JBB, JFR, and ZPM revised the manuscript. Guarantor: SSG.

**Competing interests:** SSG has received grant support from the National Institute of General Medical Sciences of the National Institutes of Health and the National Endowment for the Humanities; compute time from the National Science Foundation's Extreme Science and Engineering Discovery Environment; and support for consulting from the Texas Health and Human Services Commission. JBB has received grant support from the National Institute of General Medical Sciences of the National Institutes of Health, The National Science Foundation, and Blue Cross Blue Shield/Health Care Service Corporation. JFR has received grant support from the National Institutes of Health (National Institute of General Medical Sciences, National Institute of Allergy and Infectious Diseases, the National Institute of Mental Health), the Health Care Cost Institute, the Texas Child Mental Health Care Consortium, and the Michael and Susan Dell Foundation. He has received support through research service agreements with Austin Public Health and the Integrated Care Collaboration. He has always received funds from National Center for Advancing Translational Sciences via the NIH Division of Loan Repayment. ZPM has received grant support from the National Institute of General Medical Sciences of the National Institutes of Health, the National Science Foundation, the Summer Institute in Computational Social Science, and consulting fees from the University of Texas at Austin. MSK, JJJ, and NS have no conflicts of interest to disclose.

## References

- 1 Institute of Medicine. *Conflict of Interest in Medical Research, Education, and Practice*. Washington, DC: : The National Academies Press 2009. doi:10.17226/12598
- 2 Lundh A, Lexchin J, Mintzes B, *et al*. Industry sponsorship and research outcome. *Cochrane Database Syst Rev* Published Online First: 2017. doi:10.1002/14651858.MR000033.pub3

- 3 Waqas A, Baig AA, Khalid MA, *et al.* Conflicts of interest and outcomes of clinical trials of  
4 antidepressants: An 18-year retrospective study. *J Psychiatr Res* 2019;**116**:83–7.  
5 doi:10.1016/j.jpsychires.2019.05.029  
6
- 7  
8 4 Ahn R, Woodbridge A, Abraham A, *et al.* Financial ties of principal investigators and  
9 randomized controlled trial outcomes: cross sectional study. *BMJ* 2017;**356**:i6770.  
10 doi:10.1136/bmj.i6770  
11
- 12 5 Flacco ME, Manzoli L, Boccia S, *et al.* Head-to-head randomized trials are mostly industry  
13 sponsored and almost always favor the industry sponsor. *J Clin Epidemiol* 2015;**68**:811–20.  
14 doi:10.1016/j.jclinepi.2014.12.016  
15
- 16 6 Perlis RH, Perlis CS, Wu Y, *et al.* Industry sponsorship and financial conflict of interest in  
17 the reporting of clinical trials in psychiatry. *Am J Psychiatry* 2005;**162**:1957–60.  
18 doi:10.1176/appi.ajp.162.10.1957  
19
- 20 7 Djulbegovic B, Lacevic M, Cantor A, *et al.* The uncertainty principle and industry-sponsored  
21 research. *The Lancet* 2000;**356**:635–8. doi:10.1016/S0140-6736(00)02605-2  
22
- 23 8 Als-Nielsen B, Chen W, Gluud C, *et al.* Association of Funding and Conclusions in  
24 Randomized Drug TrialsA Reflection of Treatment Effect or Adverse Events? *JAMA*  
25 2003;**290**:921–8. doi:10.1001/jama.290.7.921  
26
- 27 9 Gyawali B, Tessema FA, Jung EH, *et al.* Assessing the Justification, Funding, Success, and  
28 Survival Outcomes of Randomized Noninferiority Trials of Cancer Drugs: A Systematic  
29 Review and Pooled Analysis. *JAMA Netw Open* 2019;**2**:e199570.  
30 doi:10.1001/jamanetworkopen.2019.9570  
31
- 32 10 Fraguas D, Díaz-Caneja CM, Pina-Camacho L, *et al.* Predictors of Placebo Response in  
33 Pharmacological Clinical Trials of Negative Symptoms in Schizophrenia: A Meta-regression  
34 Analysis. *Schizophr Bull* 2019;**45**:57–68. doi:10.1093/schbul/sbx192  
35
- 36 11 Gao Y, Ge L, Ma X, *et al.* Improvement needed in the network geometry and inconsistency  
37 of Cochrane network meta-analyses: a cross-sectional survey. *J Clin Epidemiol*  
38 2019;**113**:214–27. doi:10.1016/j.jclinepi.2019.05.022  
39
- 40 12 Kapelios CJ, Naci H, Vardas PE, *et al.* Study design, result posting and publication of late-  
41 stage cardiovascular trials. *Eur Heart J Qual Care Clin Outcomes* 2020;:qcaa080.  
42 doi:10.1093/ehjqcco/qcaa080  
43
- 44 13 Roddick AJ, Chan FTS, Stefaniak JD, *et al.* Discontinuation and non-publication of clinical  
45 trials in cardiovascular medicine. *Int J Cardiol* 2017;**244**:309–15.  
46 doi:10.1016/j.ijcard.2017.06.020  
47
- 48 14 Stefaniak JD, Lam TCH, Sim NE, *et al.* Discontinuation and non-publication of  
49 neurodegenerative disease trials: a cross-sectional analysis. *Eur J Neurol* 2017;**24**:1071–6.  
50 doi:10.1111/ene.13336  
51

- 1  
2  
3 15 Goldberg D. On Physician-Industry Relationships and Unreasonable Standards of Proof for  
4 Harm: A Population-Level Bioethics Approach. *Kennedy Inst Ethics J* 2016;**26**:173–94.  
5 doi:10.1353/ken.2016.0022  
6  
7  
8 16 Carlat DJ, Fagrelus T, Ramachandran R, *et al.* The updated AMSA scorecard of conflict-of-  
9 interest policies: a survey of U.S. medical schools. *BMC Med Educ* 2016;**16**:202.  
10 doi:10.1186/s12909-016-0725-y  
11  
12 17 AAMC. Industry Funding of Medical Education Report of an AAMC Task Force.  
13 2008.<https://www.aamc.org/system/files/c/2/482220-industryfundingofmedicaleducation.pdf>  
14 (accessed 27 Jan 2022).  
15  
16 18 BMA. Transparency and doctors with competing interests – guidance from the BMA.  
17 2017.[https://www.bma.org.uk/media/1853/bma-transparency-and-doctors-with-competing-](https://www.bma.org.uk/media/1853/bma-transparency-and-doctors-with-competing-interests-apr-2017.pdf)  
18 [interests-apr-2017.pdf](https://www.bma.org.uk/media/1853/bma-transparency-and-doctors-with-competing-interests-apr-2017.pdf)  
19  
20  
21 19 Brennan TA, Rothman DJ, Blank L, *et al.* Health industry practices that create conflicts of  
22 interest: a policy proposal for academic medical centers. *JAMA* 2006;**295**:429–33.  
23 doi:10.1001/jama.295.4.429  
24  
25 20 Lo B, Wolf LE, Berkeley A. Conflict-of-Interest Policies for Investigators in Clinical Trials.  
26 *N Engl J Med* 2000;**343**:1616–20. doi:10.1056/NEJM200011303432206  
27  
28 21 HHS Tightens Financial Conflict of Interest Rules for Researchers. Natl. Inst. Health NIH.  
29 2015.[https://www.nih.gov/news-events/news-releases/hhs-tightens-financial-conflict-](https://www.nih.gov/news-events/news-releases/hhs-tightens-financial-conflict-interest-rules-researchers)  
30 [interest-rules-researchers](https://www.nih.gov/news-events/news-releases/hhs-tightens-financial-conflict-interest-rules-researchers) (accessed 27 Jan 2022).  
31  
32  
33 22 Fabbri A, Rasmussen Hone K, Hróbjartsson A, *et al.* Conflict of Interest Policies at Medical  
34 Schools and Teaching Hospitals: A Systematic Review of Cross-sectional Studies. *Int J*  
35 *Health Policy Manag* 2021;**0**. doi:10.34172/ijhpm.2021.12  
36  
37 23 Scheffer P, Guy-Coichard C, Outh-Gauer D, *et al.* Conflict of Interest Policies at French  
38 Medical Schools: Starting from the Bottom. *PLOS ONE* 2017;**12**:e0168258.  
39 doi:10.1371/journal.pone.0168258  
40  
41  
42 24 Grabitz P, Friedmann Z, Gepp S, *et al.* Quantity and quality of conflict of interest policies at  
43 German medical schools: a cross-sectional study and survey. *BMJ Open* 2020;**10**:e039782.  
44 doi:10.1136/bmjopen-2020-039782  
45  
46 25 Oakley A, Fullerton D, Holland J, *et al.* Sexual health education interventions for young  
47 people: a methodological review. *BMJ* 1995;**310**:158–62. doi:10.1136/bmj.310.6973.158  
48  
49  
50 26 Mellor K, Eddy S, Peckham N, *et al.* Progression from external pilot to definitive  
51 randomised controlled trial: a methodological review of progression criteria reporting. *BMJ*  
52 *Open* 2021;**11**:e048178. doi:10.1136/bmjopen-2020-048178  
53  
54  
55  
56  
57  
58  
59  
60

- 1  
2  
3 27 Windt J, Ardern CL, Gabbett TJ, *et al.* Getting the most out of intensive longitudinal data: a  
4 methodological review of workload–injury studies. *BMJ Open* 2018;**8**:e022626.  
5 doi:10.1136/bmjopen-2018-022626  
6  
7  
8 28 Arksey H, O’Malley L. Scoping studies: towards a methodological framework. *Int J Soc Res*  
9 *Methodol* 2005;**8**:19–32. doi:10.1080/1364557032000119616  
10  
11 29 Zou GY. Sample size formulas for estimating intraclass correlation coefficients with  
12 precision and assurance. *Stat Med* 2012;**31**:3972–81. doi:10.1002/sim.5466  
13  
14 30 Kelly RE, Cohen LJ, Semple RJ, *et al.* Relationship between drug company funding and  
15 outcomes of clinical psychiatric research. *Psychol Med* 2006;**36**:1647–56.  
16 doi:10.1017/S0033291706008567  
17  
18 31 Jinapriya D, Anraku A, Alasbali T, *et al.* Evaluation of investigator bias in industry-funded  
19 clinical trials of latanoprost. *Can J Ophthalmol J Can Ophthalmol* 2011;**46**:531–6.  
20 doi:10.1016/j.jcjo.2011.09.015  
21  
22 32 Rattinger G, Bero L. Factors Associated with Results and Conclusions of Trials of  
23 Thiazolidinediones. *PLOS ONE* 2009;**4**:e5826. doi:10.1371/journal.pone.0005826  
24  
25 33 Ahmer S, Arya P, Anderson D, *et al.* Conflict of interest in psychiatry. *Psychiatr Bull*  
26 2005;**29**:302–4. doi:10.1192/pb.29.8.302  
27  
28 34 Bond K, Spooner C, Tjosvold L, *et al.* The nature and influence of pharmaceutical industry  
29 involvement in asthma trials. *Can Respir J J Can Thorac Soc* 2012;**19**:267–71.  
30  
31 35 Vlad SC, LaValley MP, McAlindon TE, *et al.* Glucosamine for pain in osteoarthritis: why do  
32 trial results differ? *Arthritis Rheum* 2007;**56**:2267–77. doi:10.1002/art.22728  
33  
34 36 Saa C, Bunout D, Hirsch S. Industry funding effect on positive results of probiotic use in the  
35 management of acute diarrhea: a systematized review. *Eur J Gastroenterol Hepatol*  
36 2019;**31**:289–302. doi:10.1097/MEG.0000000000001322  
37  
38 37 Bartels RHMA, Delye H, Boogaarts J. Financial disclosures of authors involved in spine  
39 research: an underestimated source of bias. *Eur Spine J Off Publ Eur Spine Soc Eur Spinal*  
40 *Deform Soc Eur Sect Cerv Spine Res Soc* 2012;**21**:1229–33. doi:10.1007/s00586-011-2086-x  
41  
42 38 Cherla DV, Viso CP, Holihan JL, *et al.* The Effect of Financial Conflict of Interest,  
43 Disclosure Status, and Relevance on Medical Research from the United States. *J Gen Intern*  
44 *Med* 2019;**34**:429–34. doi:10.1007/s11606-018-4784-0  
45  
46 39 Slaughter S, Feldman MP, Thomas SL. U.S. Research Universities’ Institutional Conflict of  
47 Interest Policies. *J Empir Res Hum Res Ethics* 2009;**4**:3–20. doi:10.1525/jer.2009.4.3.3  
48  
49 40 Rochon PA, Sekeres M, Lexchin J, *et al.* Institutional financial conflicts of interest policies  
50 at Canadian academic health science centres: a national survey. *Open Med* 2010;**4**:e134–8.  
51  
52  
53  
54  
55  
56  
57  
58  
59  
60



- 1  
2  
3 41 Resnik DB, Ariansen JL, Jamal J, *et al.* Institutional Conflict of Interest Policies at U.S.  
4 Academic Research Institutions. *Acad Med J Assoc Am Med Coll* 2016;**91**:242–6.  
5 doi:10.1097/ACM.0000000000000980  
6  
7 42 Nichols-Casebolt A, Macrina FL. Current Perspectives Regarding Institutional Conflict of  
8 Interest. *Sci Eng Ethics* 2019;**25**:1671–7. doi:10.1007/s11948-015-9703-8  
9  
10 43 Graham SS, Majdik ZP, Barbour JB, *et al.* Associations between aggregate NLP-extracted  
11 conflicts of interest and adverse events by drug product. *Stud Health Technol Inform*  
12  
13 44 Graham SS, Majdik ZP, Clark D, *et al.* Relationships among commercial practices and  
14 author conflicts of interest in biomedical publishing. *PLOS ONE* 2020;**15**:e0236166.  
15 doi:10.1371/journal.pone.0236166  
16  
17  
18  
19  
20  
21

## Figure Legends

22  
23  
24 **Figure 1.** PRISMA Flow Diagram

25  
26  
27 **Figure 2:** Variable Types By Year Number (1986-2021). Figure includes number of studies per  
28 year by dependent variable (DV) type (A), number of studies by independent variable (IV) type  
29 for studies assessing industry funding (B) and number of studies by IV type for studies  
30 evaluating COI (C).  
31  
32  
33  
34  
35  
36  
37  
38  
39  
40  
41  
42  
43  
44  
45  
46  
47  
48  
49  
50  
51  
52  
53  
54  
55  
56  
57  
58  
59  
60

PRISMA 2020 flow diagram for updated systematic reviews which included searches of databases and registers only

1  
2  
3  
4  
5  
6  
7  
8  
9  
10  
11  
12  
13  
14  
15  
16  
17  
18  
19  
20  
21  
22  
23  
24  
25  
26  
27  
28  
29  
30  
31  
32  
33  
34  
35  
36  
37  
38  
39  
40  
41  
42  
43  
44  
45  
46  
47  
48  
49  
50  
51  
52  
53  
54  
55  
56  
57  
58  
59  
60

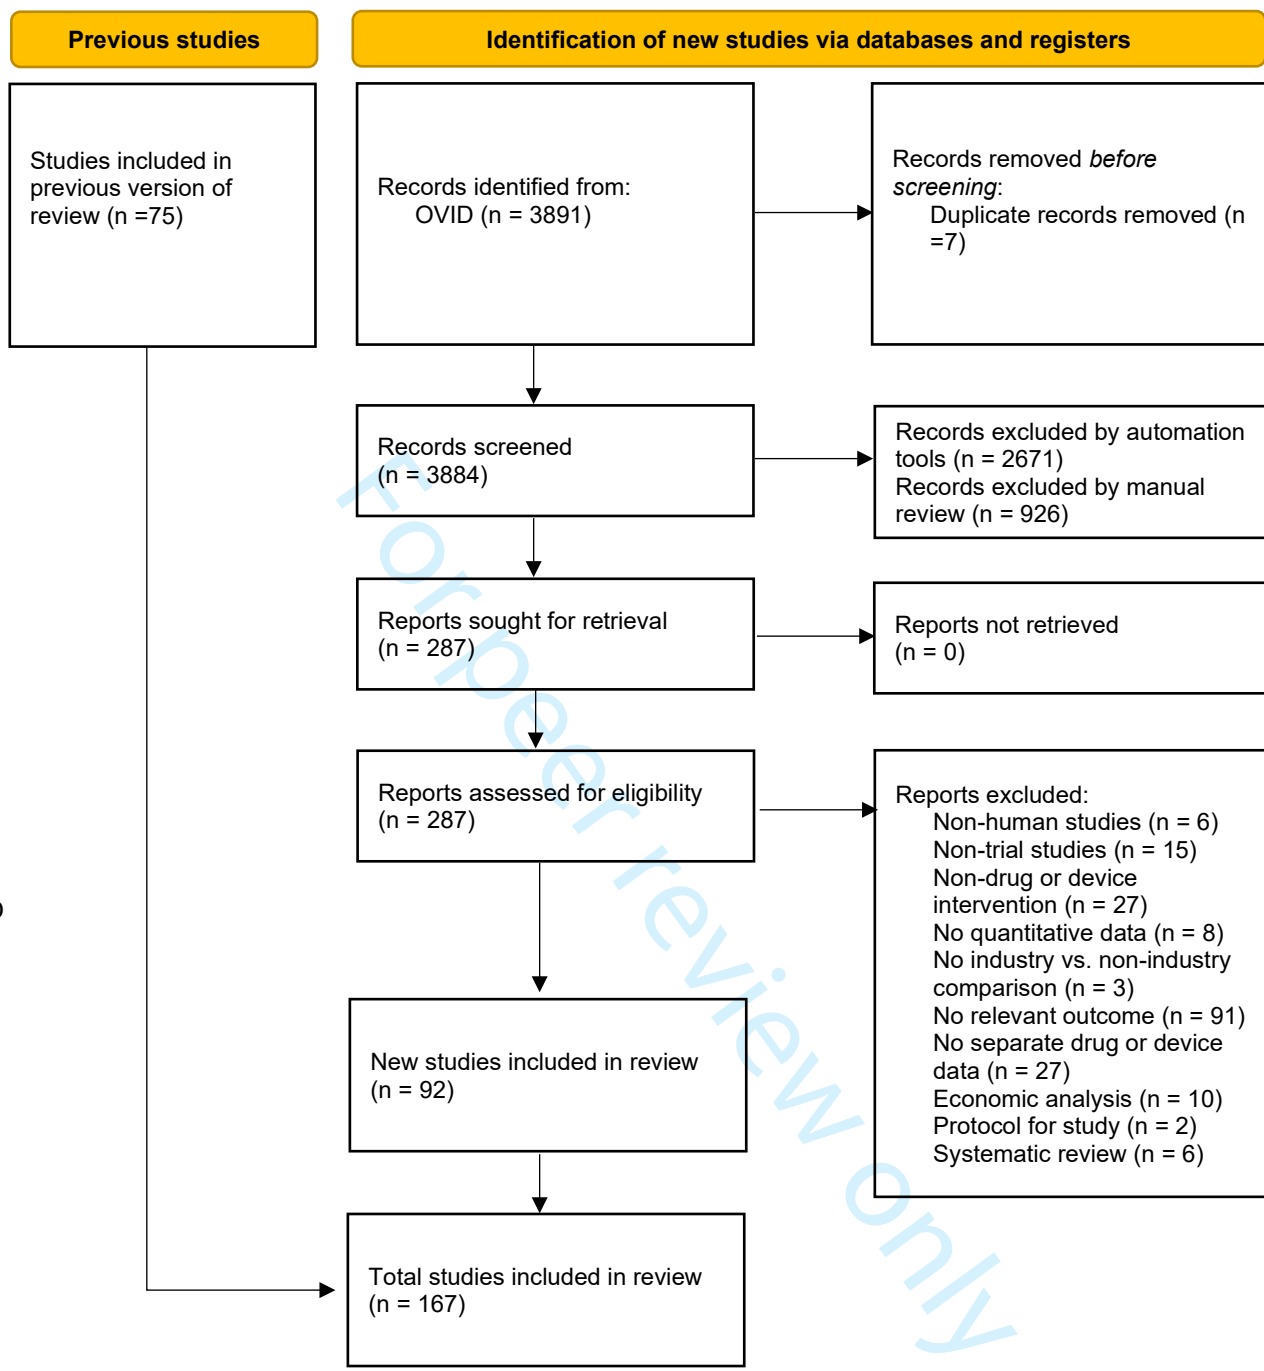



1  
2  
3  
4  
5  
6  
7  
8  
9  
10  
11  
12  
13  
14  
15  
16  
17  
18  
19  
20  
21  
22  
23  
24  
25  
26  
27  
28  
29  
30  
31  
32  
33  
34  
35  
36  
37  
38  
39  
40  
41  
42  
43  
44  
45  
46  
47

# Supplementary Online Materials

| <b>Industry Funding Independent Variable (IV) Type.</b> |                                                                                                                                                                                                                                                                                                                                                                                                                                                                                                                                           |
|---------------------------------------------------------|-------------------------------------------------------------------------------------------------------------------------------------------------------------------------------------------------------------------------------------------------------------------------------------------------------------------------------------------------------------------------------------------------------------------------------------------------------------------------------------------------------------------------------------------|
| Stratified                                              | Study provides a quantitative assessment of the relationship between different types of industry funding and one or more outcomes of interest. Industry funding may be analyzed as a categorical variable or as a series of dichotomous variables representing a range of industry funding categories. Funder stratifications may include level of involvement (primary, secondary), relationship to drug or device under study (manufacturer, competitor), or mode of sponsorship (study sponsor, medication provider, author employer). |
| Unstratified                                            | Industry funding is analyzed as a dichotomous variable or as one category in a categorical variable, e.g. funder types might include industry, government, nonprofit.                                                                                                                                                                                                                                                                                                                                                                     |
| Magnitude                                               | Industry funding is a continuous variable representing either the total number of industry funders per study or total dollar value of contributions.                                                                                                                                                                                                                                                                                                                                                                                      |
| <b>Author COI IV Type</b>                               |                                                                                                                                                                                                                                                                                                                                                                                                                                                                                                                                           |
| Stratified                                              | Study provides a quantitative assessment of the relationship between different types of COI and one or more outcomes of interest. Industry funding may be analyzed as a categorical variable or as a series of dichotomous variables representing a range of COI categories. COI stratifications may include type of disbursement (employment, speaker fees, etc) and affiliation (trial sponsor vs. non-sponsor funder).                                                                                                                 |
| Unstratified                                            | COI is analyzed as a dichotomous variable or as one category in a categorical variable, e.g., Industry funding, Author COI, Government Funding.                                                                                                                                                                                                                                                                                                                                                                                           |
| Magnitude                                               | COI is a continuous variable representing either the total number of relationships or the total dollar value of contributions.                                                                                                                                                                                                                                                                                                                                                                                                            |
| <b>COI as Proxy for Industry Funding Study</b>          |                                                                                                                                                                                                                                                                                                                                                                                                                                                                                                                                           |
| Yes                                                     | Disclosed author COI are used as inclusion criteria for industry funding.                                                                                                                                                                                                                                                                                                                                                                                                                                                                 |
| No                                                      | Disclosed COI are not used as inclusion criteria for industry funding or industry funding is not measured.                                                                                                                                                                                                                                                                                                                                                                                                                                |
| <b>IV Dichotomization</b>                               |                                                                                                                                                                                                                                                                                                                                                                                                                                                                                                                                           |
| NA                                                      | The IV used in the statistical analysis was stratified or an assessment of magnitude.                                                                                                                                                                                                                                                                                                                                                                                                                                                     |
| Yes                                                     | The categorical schema was converted to dichotomous variables that were used for analysis.                                                                                                                                                                                                                                                                                                                                                                                                                                                |
| No                                                      | The IV was consistently treated as dichotomous throughout the article.                                                                                                                                                                                                                                                                                                                                                                                                                                                                    |
| <b>Dependent Variable Type (DV Type)</b>                |                                                                                                                                                                                                                                                                                                                                                                                                                                                                                                                                           |
| Outcome                                                 | The analysis evaluates if chosen IVs are associated with results indicating the success of the intervention (drug, device, etc) or are otherwise favorable to trial sponsors. Includes drug efficacy, response rate, positive interpretation of findings, etc.                                                                                                                                                                                                                                                                            |
| Safety                                                  | The analysis evaluates if chosen IVs associate with results related to drug safety.                                                                                                                                                                                                                                                                                                                                                                                                                                                       |
| Quality                                                 | The analysis evaluates if chosen IVs are associated with results related to methodological or reporting quality. Includes issues of statistical power, risk of bias, presence of hype or spin.                                                                                                                                                                                                                                                                                                                                            |
| Reporting                                               | The analysis evaluates whether or not trial results were reported at all. May include reporting to ClinicalTrials.gov or publication of findings.                                                                                                                                                                                                                                                                                                                                                                                         |

**Supplemental Table 1. Methodological Design Feature Schema for Analyzed Studies.** Definition and details for industry funding IV type, author COI IV type, COI as proxy for industry funding, dichotomization, and DV type analyses.

1  
2  
3  
4  
5  
6  
7  
8  
9  
10  
11  
12  
13  
14  
15  
16  
17  
18  
19  
20  
21  
22  
23  
24  
25  
26  
27  
28  
29  
30  
31  
32  
33  
34  
35  
36  
37  
38  
39  
40  
41  
42  
43  
44  
45  
46  
47  
48  
49  
50  
51  
52  
53  
54  
55  
56  
57  
58  
59  
60

| <i>Article</i>                          | <i>Year</i> | <i>IF IV Type</i> | <i>COI IV Type</i> | <i>DV Type</i>        | <i>COI Proxy</i> | <i>IF Dichotomize</i> | <i>COI Dichotomize</i> |
|-----------------------------------------|-------------|-------------------|--------------------|-----------------------|------------------|-----------------------|------------------------|
| <i>Abildgaard et al. (1)</i>            | 2019        | Unstratified      | None               | Outcome               | yes              | yes                   | NA                     |
| <i>Addeo et al. (2)</i>                 | 2019        | Unstratified      | None               | Outcome,<br>Safety    | no               | no                    | NA                     |
| <i>Abmer et al. (3)</i>                 | 2005        | Stratified        | Unstratified       | Outcome               | no               | NA                    | no                     |
| <i>Abn et al. (4)</i>                   | 2016        | Unstratified      | Unstratified       | Outcome               | no               | no                    | yes                    |
| <i>Alasbali et al. (5)</i>              | 2009        | Unstratified      | None               | Outcome,<br>Quality   | no               | no                    | NA                     |
| <i>Als-Nielsen et al. (6)</i>           | 2003        | Unstratified      | None               | Outcome               | yes              | NA                    | NA                     |
| <i>Arni et al. (7)</i>                  | 2004        | Unstratified      | None               | Quality               | no               | no                    | NA                     |
| <i>Azad et al. (8)</i>                  | 2019        | Unstratified      | None               | Quality               | no               | NA                    | NA                     |
| <i>Azharuddin et al. (9)</i>            | 2020        | Unstratified      | None               | Quality               | no               | no                    | NA                     |
| <i>Barden et al. (10)</i>               | 2005        | Unstratified      | None               | Outcome               | yes              | no                    | NA                     |
| <i>Bariani et al. (11)</i>              | 2013        | Unstratified      | Unstratified       | Outcome               | no               | yes                   | yes                    |
| <i>Bartels et al. (12)</i>              | 2012        | Unstratified      | Stratified         | Outcome               | yes              | no                    | NA                     |
| <i>Bero et al. (13)</i>                 | 2007        | Unstratified      | Unstratified       | Outcome               | no               | NA                    | no                     |
| <i>Bhandari et al. (14)</i>             | 2004        | Unstratified      | None               | Outcome               | no               | yes                   | no                     |
| <i>Bighelli et al. (15)</i>             | 2020        | Unstratified      | Unstratified       | Quality               | no               | no                    | NA                     |
| <i>Bond et al. (16)</i>                 | 2012        | Stratified        | Unstratified       | Outcome               | yes              | NA                    | no                     |
| <i>Booth et al. (17)</i>                | 2008        | Unstratified      | None               | Outcome,<br>Quality   | no               | NA                    | NA                     |
| <i>Bourgeois et al. (18)</i>            | 2010        | Unstratified      | None               | Outcome,<br>Quality   | no               | NA                    | NA                     |
| <i>Brown et al. (19)</i>                | 2006        | Unstratified      | None               | Outcome,<br>Quality   | no               | no                    | NA                     |
| <i>Buchkowsky and<br/>Jewesson (20)</i> | 2004        | Unstratified      | Unstratified       | Outcome               | no               | NA                    | no                     |
| <i>Budhiraja et al. (21)</i>            | 2021        | Unstratified      | None               | Outcome               | no               | NA                    | NA                     |
| <i>Bugano et al et al.<br/>(22)</i>     | 2017        | Unstratified      | None               | Outcome,<br>Quality   | no               | no                    | NA                     |
| <i>Catillon (23)</i>                    | 2019        | Unstratified      | Unstratified       | Quality               | no               | no                    | NA                     |
| <i>Chang et al. (24)</i>                | 2021        | Unstratified      | None               | Quality               | no               | NA                    | NA                     |
| <i>Chard et al. (25)</i>                | 2000        | Unstratified      | None               | Outcome,<br>Quality   | no               | NA                    | NA                     |
| <i>Chen et al. (26)</i>                 | 2016        | Unstratified      | None               | Reporting             | no               | NA                    | NA                     |
| <i>Cherla et al. (27)</i>               | 2018        | None              | Stratified         | Outcome               | no               | NA                    | NA                     |
| <i>Cho and Bera (28)</i>                | 1996        | Unstratified      | None               | Outcome,<br>Quality   | yes              | no                    | NA                     |
| <i>Clark et al. (29)</i>                | 2002        | Unstratified      | None               | Outcome               | no               | no                    | NA                     |
| <i>Clifford et al. (30)</i>             | 2002        | Unstratified      | None               | Outcome,<br>Quality   | no               | NA                    | NA                     |
| <i>Corona et al. (31)</i>               | 2014a       | Unstratified      | None               | Quality,<br>Safety    | yes              | no                    | NA                     |
| <i>Corona et al. (32)</i>               | 2014b       | Unstratified      | None               | Outcome,<br>Quality   | yes              | no                    | NA                     |
| <i>Cristea et al. (33)</i>              | 2017        | None              | Unstratified       | Outcome               | no               | NA                    | no                     |
| <i>Crocetti et al. (34)</i>             | 2010        | Unstratified      | None               | Quality               | no               | NA                    | NA                     |
| <i>Davidović et al. (35)</i>            | 2021        | Unstratified      | None               | Outcome,<br>Reporting | no               | no                    | NA                     |
| <i>Davidson (36)</i>                    | 1986        | Unstratified      | None               | Outcome               | yes              | no                    | NA                     |

|    |                                           |       |              |              |                    |     |     |     |
|----|-------------------------------------------|-------|--------------|--------------|--------------------|-----|-----|-----|
| 1  |                                           |       |              |              |                    |     |     |     |
| 2  |                                           |       |              |              |                    |     |     |     |
| 3  | <i>Davis et al. (37)</i>                  | 2008  | Unstratified | None         | Outcome            | yes | no  | NA  |
| 4  | <i>de Souza Gutierrez et al. (38)</i>     | 2020  | Unstratified | None         | Quality            | no  | no  | NA  |
| 5  | <i>DeFrance et al. (39)</i>               | 2021  | None         | Unstratified | Outcome            | no  | NA  | no  |
| 6  | <i>DeGeorge et al. (40)</i>               | 2015  | Unstratified | Unstratified | Outcome            | no  | NA  | no  |
| 7  | <i>Del Paggio et al. (41)</i>             | 2017  | Unstratified | None         | Outcome, Quality   | no  | no  | NA  |
| 8  |                                           |       |              |              |                    |     |     |     |
| 9  | <i>Falk Delgado and Falk Delgado (42)</i> | 2017a | Unstratified | None         | Outcome            | no  | NA  | NA  |
| 10 | <i>Falk Delgado and Falk Delgado (43)</i> | 2017b | Unstratified | Unstratified | Reporting          | no  | NA  | no  |
| 11 | <i>DePasse et al. (44)</i>                | 2018  | Unstratified | None         | Reporting          | no  | NA  | NA  |
| 12 | <i>DeVito et al. (45)</i>                 | 2020  | Unstratified | None         | Reporting          | no  | NA  | NA  |
| 13 | <i>Djulfbegovic et al. (46)</i>           | 2013  | Unstratified | None         | Outcome            | no  | no  | NA  |
| 14 | <i>Djulfbegovic et al. (47)</i>           | 2000  | Unstratified | None         | Quality            | yes | no  | NA  |
| 15 | <i>Eitter et al. (48)</i>                 | 2007  | Unstratified | None         | Outcome            | yes | no  | NA  |
| 16 | <i>Finucane and Boulton (49)</i>          | 2004  | Unstratified | None         | Outcome            | yes | no  | NA  |
| 17 | <i>Flacco et al. (50)</i>                 | 2015  | Unstratified | Unstratified | Outcome, Quality   | yes | yes | no  |
| 18 | <i>Fraguas et al. (51)</i>                | 2018  | Unstratified | None         | Quality            | no  | no  | NA  |
| 19 | <i>Freemantle et al. (52)</i>             | 2000  | Unstratified | None         | Outcome            | no  | no  | NA  |
| 20 | <i>Fung et al. (53)</i>                   | 2017  | Unstratified | None         | Quality, Reporting | no  | no  | NA  |
| 21 | <i>Gabler et al. (54)</i>                 | 2016  | Unstratified | None         | Reporting, Quality | no  | no  | NA  |
| 22 | <i>Gan et al. (55)</i>                    | 2012  | Unstratified | None         | Quality            | no  | no  | NA  |
| 23 | <i>Gao et al. (56)</i>                    | 2019  | Unstratified | None         | Quality            | no  | NA  | NA  |
| 24 | <i>Gartlehner et al. (57)</i>             | 2010  | Unstratified | None         | Outcome, Quality   | yes | no  | NA  |
| 25 | <i>Gandino et al. (58)</i>                | 2020  | Unstratified | Unstratified | Outcome, Quality   | yes | no  | yes |
| 26 | <i>Gonzalez et al. (59)</i>               | 2019  | Unstratified | None         | Quality            | no  | NA  | NA  |
| 27 | <i>Grey et al. (60)</i>                   | 2018  | Unstratified | None         | Outcome            | no  | no  | NA  |
| 28 | <i>Gyawali et al. (61)</i>                | 2019  | Unstratified | None         | Safety             | no  | NA  | NA  |
| 29 | <i>Hajibandeh et al. (62)</i>             | 2017  | Unstratified | Unstratified | Outcome            | no  | no  | no  |
| 30 | <i>Halpern et al. (63)</i>                | 2004  | Unstratified | None         | Quality            | no  | NA  | NA  |
| 31 | <i>Hanna et al. (64)</i>                  | 2016  | Unstratified | None         | Outcome            | no  | NA  | NA  |
| 32 | <i>Hashemipour et al. (65)</i>            | 2019  | Unstratified | Unstratified | Outcome            | no  | no  | no  |
| 33 | <i>Hengartner et al. (66)</i>             | 2021  | Unstratified | None         | Safety             | yes | no  | NA  |
| 34 | <i>Heres et al. (67)</i>                  | 2006  | Unstratified | None         | Outcome            | no  | no  | NA  |
| 35 | <i>Janiand et al. (68)</i>                | 2018  | Unstratified | None         | Outcome            | no  | yes | NA  |
| 36 | <i>Jefferson et al. (69)</i>              | 2009  | Unstratified | None         | Quality            | no  | no  | NA  |
| 37 | <i>Jellison et al. (70)</i>               | 2020  | Unstratified | None         | Quality            | no  | yes | NA  |
| 38 | <i>Jimapriya et al. (71)</i>              | 2011  | Stratified   | None         | Outcome            | no  | NA  | NA  |
| 39 | <i>Johnson et al. (72)</i>                | 2020  | Unstratified | None         | Reporting          | no  | NA  | NA  |
| 40 |                                           |       |              |              |                    |     |     |     |
| 41 |                                           |       |              |              |                    |     |     |     |
| 42 |                                           |       |              |              |                    |     |     |     |
| 43 |                                           |       |              |              |                    |     |     |     |
| 44 |                                           |       |              |              |                    |     |     |     |
| 45 |                                           |       |              |              |                    |     |     |     |
| 46 |                                           |       |              |              |                    |     |     |     |
| 47 |                                           |       |              |              |                    |     |     |     |
| 48 |                                           |       |              |              |                    |     |     |     |
| 49 |                                           |       |              |              |                    |     |     |     |
| 50 |                                           |       |              |              |                    |     |     |     |
| 51 |                                           |       |              |              |                    |     |     |     |
| 52 |                                           |       |              |              |                    |     |     |     |
| 53 |                                           |       |              |              |                    |     |     |     |
| 54 |                                           |       |              |              |                    |     |     |     |
| 55 |                                           |       |              |              |                    |     |     |     |
| 56 |                                           |       |              |              |                    |     |     |     |
| 57 |                                           |       |              |              |                    |     |     |     |
| 58 |                                           |       |              |              |                    |     |     |     |
| 59 |                                           |       |              |              |                    |     |     |     |
| 60 |                                           |       |              |              |                    |     |     |     |

|    |                                            |      |              |              |                       |     |    |    |
|----|--------------------------------------------|------|--------------|--------------|-----------------------|-----|----|----|
| 1  |                                            |      |              |              |                       |     |    |    |
| 2  |                                            |      |              |              |                       |     |    |    |
| 3  | <i>Jones et al. (73)</i>                   | 2010 | Unstratified | None         | Quality               | no  | NA | NA |
| 4  | <i>Kakkar et al. (74)</i>                  | 2019 | Unstratified | None         | Quality               | no  | no | NA |
| 5  | <i>Kapelios et al. (75)</i>                | 2020 | Unstratified | None         | Outcome,<br>Quality   | no  | no | NA |
| 6  |                                            |      |              |              | Outcome               | yes | NA | NA |
| 7  | <i>Kelly et al. (76)</i>                   | 2006 | Stratified   | None         | Outcome               | yes | NA | NA |
| 8  |                                            |      |              |              |                       |     |    |    |
| 9  | <i>Kemmeren et al. (77)</i>                | 2001 | Unstratified | None         | Safety                | no  | no | NA |
| 10 | <i>Khan et al. (78)</i>                    | 2012 | Unstratified | None         | Outcome,<br>Quality   | no  | NA | NA |
| 11 |                                            |      |              |              | Outcome               | yes | no | NA |
| 12 | <i>Killin et al. (79)</i>                  | 2014 | Unstratified | None         | Outcome               | yes | no | NA |
| 13 | <i>Kjaergard and Als-<br/>Nielsen (80)</i> | 2002 | Unstratified | None         | Outcome               | no  | NA | NA |
| 14 | <i>Lee et al. (81)</i>                     | 2012 | Unstratified | None         | COI,<br>Outcome       | no  | no | NA |
| 15 |                                            |      |              |              | Reporting             | no  | no | NA |
| 16 | <i>Lee et al. (82)</i>                     | 2020 | Unstratified | None         | Outcome               | no  | no | no |
| 17 | <i>Leite et al. (83)</i>                   | 2017 | Unstratified | Unstratified | Outcome               | no  | no | no |
| 18 | <i>Leucht et al. (84)</i>                  | 2017 | Unstratified | None         | Outcome,<br>Quality   | no  | no | NA |
| 19 |                                            |      |              |              | Outcome               | no  | no | NA |
| 20 | <i>Leucht et al. (85)</i>                  | 2019 | Unstratified | None         | Outcome               | no  | no | NA |
| 21 | <i>Linker et al. (86)</i>                  | 2017 | Unstratified | None         | Outcome,<br>Quality   | no  | NA | NA |
| 22 |                                            |      |              |              | Outcome               | yes | no | NA |
| 23 | <i>Liss (87)</i>                           | 2006 | Unstratified | None         | Outcome               | yes | no | NA |
| 24 | <i>Liu et al. (88)</i>                     | 2018 | Unstratified | None         | Outcome               | no  | NA | NA |
| 25 | <i>Lubowitz et al. (89)</i>                | 2007 | Unstratified | None         | Outcome               | no  | no | NA |
| 26 | <i>Lynch et al. (90)</i>                   | 2007 | Unstratified | None         | Outcome,<br>Quality   | yes | NA | NA |
| 27 |                                            |      |              |              | Outcome,<br>Safety    | no  | no | NA |
| 28 | <i>Ma et al. (91)</i>                      | 2014 | Unstratified | None         | Reporting,<br>Outcome | no  | NA | NA |
| 29 | <i>Magnani et al. (92)</i>                 | 2021 | Unstratified | None         | Outcome               | no  | no | NA |
| 30 |                                            |      |              |              | Outcome               | no  | no | NA |
| 31 | <i>Maillet et al. (93)</i>                 | 2015 | Unstratified | None         | Outcome               | no  | no | NA |
| 32 | <i>Malek et al. (94)</i>                   | 2017 | Unstratified | None         | Outcome               | no  | no | NA |
| 33 | <i>Mian et al. (95)</i>                    | 2020 | Unstratified | None         | Quality               | no  | NA | NA |
| 34 | <i>Mitchell and<br/>Patterson (96)</i>     | 2020 | Unstratified | None         | Quality               | no  | NA | NA |
| 35 | <i>Momeni et al. (97)</i>                  | 2009 | Unstratified | None         | Outcome               | no  | NA | NA |
| 36 | <i>Moncrieff (98)</i>                      | 2003 | Unstratified | None         | Outcome               | no  | no | NA |
| 37 | <i>Montgomery et al.<br/>(99)</i>          | 2004 | Unstratified | Unstratified | Outcome,<br>Quality   | no  | no | no |
| 38 | <i>Moraes et al. (100)</i>                 | 2017 | Unstratified | Unstratified | Outcome               | no  | NA | no |
| 39 | <i>Mossman et al. (101)</i>                | 2021 | Unstratified | None         | Outcome               | no  | no | NA |
| 40 | <i>Naci et al. (102)</i>                   | 2014 | Unstratified | None         | Outcome,<br>Quality   | no  | no | NA |
| 41 |                                            |      |              |              | Quality               | no  | no | NA |
| 42 | <i>Ng et al. (103)</i>                     | 2016 | Unstratified | None         | Quality               | no  | no | NA |
| 43 | <i>Nieto et al. (104)</i>                  | 2007 | Unstratified | None         | Safety                | no  | no | NA |
| 44 | <i>Nithianandan et al.<br/>(105)</i>       | 2020 | Unstratified | Unstratified | Outcome               | no  | no | no |
| 45 | <i>Odutayo et al. (106)</i>                | 2017 | Unstratified | None         | Outcome               | no  | no | NA |
| 46 | <i>Paggio et al. (107)</i>                 | 2021 | Unstratified | None         | Quality               | no  | no | NA |
| 47 | <i>Pasalic et al. (108)</i>                | 2020 | Unstratified | None         | Quality               | no  | no | NA |
| 48 | <i>Pengel et al. (109)</i>                 | 2009 | Unstratified | None         | Quality               | yes | NA | NA |
| 49 |                                            |      |              |              |                       |     |    |    |
| 50 |                                            |      |              |              |                       |     |    |    |
| 51 |                                            |      |              |              |                       |     |    |    |
| 52 |                                            |      |              |              |                       |     |    |    |
| 53 |                                            |      |              |              |                       |     |    |    |
| 54 |                                            |      |              |              |                       |     |    |    |
| 55 |                                            |      |              |              |                       |     |    |    |
| 56 |                                            |      |              |              |                       |     |    |    |
| 57 |                                            |      |              |              |                       |     |    |    |
| 58 |                                            |      |              |              |                       |     |    |    |
| 59 |                                            |      |              |              |                       |     |    |    |
| 60 |                                            |      |              |              |                       |     |    |    |

|    |                               |       |              |              |                         |     |     |    |
|----|-------------------------------|-------|--------------|--------------|-------------------------|-----|-----|----|
| 1  |                               |       |              |              |                         |     |     |    |
| 2  |                               |       |              |              |                         |     |     |    |
| 3  | <i>Pepper et al. (110)</i>    | 2019  | Unstratified | None         | Safety                  | no  | no  | NA |
| 4  | <i>Peppercorn et al.</i>      | 2007  | Unstratified | Unstratified | Outcome                 | yes | no  | no |
| 5  | <i>(111)</i>                  |       |              |              |                         |     |     |    |
| 6  | <i>Perlis et al. (112)</i>    | 2005a | Unstratified | Unstratified | Outcome,<br>Quality     | yes | no  | no |
| 7  |                               |       |              |              |                         |     |     |    |
| 8  | <i>Perlis et al. (113)</i>    | 2005b | Unstratified | Unstratified | Outcome                 | yes | no  | no |
| 9  | <i>Popelut et al. (114)</i>   | 2010  | Unstratified | None         | Outcome                 | no  | NA  | no |
| 10 | <i>Pouwels et al. (115)</i>   | 2017  | Unstratified | None         | Outcome,<br>Quality     | no  | no  | NA |
| 11 |                               |       |              |              |                         |     |     |    |
| 12 | <i>Prakash et al. (116)</i>   | 2018  | Unstratified | None         | Quality                 | no  | NA  | NA |
| 13 | <i>Price-Haywood et al.</i>   | 2019  | Unstratified | None         | Safety                  | no  | NA  | NA |
| 14 | <i>(117)</i>                  |       |              |              |                         |     |     |    |
| 15 | <i>Printz et al. (118)</i>    | 2013  | Unstratified | None         | Outcome                 | yes | no  | NA |
| 16 | <i>Probst et al. (119)</i>    | 2016  | Unstratified | None         | Outcome                 | no  | no  | NA |
| 17 | <i>Punja et al. (120)</i>     | 2016  | Unstratified | None         | Outcome,<br>Safety      | no  | no  | NA |
| 18 |                               |       |              |              |                         |     |     |    |
| 19 | <i>Putman et al. (121)</i>    | 2021  | Unstratified | None         | Quality                 | yes | no  | NA |
| 20 | <i>Raman et al. (122)</i>     | 2018  | Unstratified | Unstratified | Outcome                 | no  | NA  | no |
| 21 | <i>Rasmussen et al.</i>       | 2009  | Unstratified | None         | Outcome                 | yes | yes | NA |
| 22 | <i>(123)</i>                  |       |              |              |                         |     |     |    |
| 23 | <i>Rattinger and Bero</i>     | 2009  | Stratified   | Stratified   | Outcome                 | yes | NA  | NA |
| 24 | <i>(124)</i>                  |       |              |              |                         |     |     |    |
| 25 | <i>Reda et al. (125)</i>      | 2016  | Unstratified | None         | Outcome,<br>Quality     | no  | yes | NA |
| 26 |                               |       |              |              |                         |     |     |    |
| 27 | <i>Rees et al. (126)</i>      | 2019  | Unstratified | None         | Reporting               | no  | NA  | NA |
| 28 | <i>Ridker and Torres</i>      | 2006  | Unstratified | None         | Outcome                 | no  | NA  | NA |
| 29 | <i>(127)</i>                  |       |              |              |                         |     |     |    |
| 30 | <i>Rios et al. (128)</i>      | 2008  | Unstratified | None         | Quality                 | no  | NA  | NA |
| 31 | <i>Rochon et al. (129)</i>    | 1994  | Unstratified | None         | Outcome,<br>Quality     | yes | no  | NA |
| 32 |                               |       |              |              |                         |     |     |    |
| 33 | <i>Roddick et al. (130)</i>   | 2017  | Unstratified | None         | Outcome                 | no  | NA  | NA |
| 34 | <i>Roper et al. (131)</i>     | 2014  | Unstratified | None         | Limitations,<br>Outcome | no  | NA  | NA |
| 35 |                               |       |              |              |                         |     |     |    |
| 36 | <i>Rosner et al. (132)</i>    | 2010  | Unstratified | None         | Outcome,<br>Quality     | no  | no  | NA |
| 37 | <i>Rosner et al. (133)</i>    | 2011  | Unstratified | None         | Outcome                 | no  | NA  | no |
| 38 | <i>Saa et al. (134)</i>       | 2018  | Stratified   | None         | Outcome,<br>Quality     | yes | NA  | NA |
| 39 | <i>Saleh et al. (135)</i>     | 2020  | Unstratified | None         | Outcome                 | no  | no  | NA |
| 40 | <i>Sendyk et al. (136)</i>    | 2019  | Unstratified | None         | Quality,<br>Reporting   | no  | no  | NA |
| 41 |                               |       |              |              |                         |     |     |    |
| 42 | <i>Shepard et al. (137)</i>   | 2021  | Unstratified | None         | Quality                 | no  | NA  | NA |
| 43 | <i>Silva et al. (138)</i>     | 2017  | Unstratified | None         | Safety,<br>Quality      | no  | no  | NA |
| 44 |                               |       |              |              |                         |     |     |    |
| 45 | <i>Simonetti et al. (139)</i> | 2019  | Unstratified | None         | Safety                  | no  | no  | NA |
| 46 | <i>Sinyor et al. (140)</i>    | 2012  | Unstratified | None         | Outcome,<br>Safety      | yes | no  | NA |
| 47 |                               |       |              |              |                         |     |     |    |
| 48 | <i>Son et al. (141)</i>       | 2016  | Unstratified | None         | Outcome                 | no  | no  | NA |
| 49 | <i>Spanenberg et al.</i>      | 2011  | Unstratified | None         | Outcome,<br>Quality     | no  | no  | NA |
| 50 | <i>(142)</i>                  |       |              |              |                         |     |     |    |
| 51 | <i>Sriganesh et al. (143)</i> | 2017  | Unstratified | None         | Quality                 | no  | no  | NA |
| 52 | <i>Stefaniak et al. (144)</i> | 2017  | Unstratified | None         | Reporting,<br>Quality   | no  | NA  | NA |
| 53 |                               |       |              |              |                         |     |     |    |
| 54 | <i>Steffens et al. (145)</i>  | 2021  | Unstratified | None         | Quality                 | yes | no  | NA |
| 55 |                               |       |              |              |                         |     |     |    |
| 56 |                               |       |              |              |                         |     |     |    |
| 57 |                               |       |              |              |                         |     |     |    |
| 58 |                               |       |              |              |                         |     |     |    |
| 59 |                               |       |              |              |                         |     |     |    |
| 60 |                               |       |              |              |                         |     |     |    |



1  
2  
3  
4  
5  
6  
7  
8  
9  
10  
11  
12  
13  
14  
15  
16  
17  
18  
19  
20  
21  
22  
23  
24  
25  
26  
27  
28  
29  
30  
31  
32  
33  
34  
35  
36  
37  
38  
39  
40  
41  
42  
43  
44  
45  
46  
47  
48  
49  
50  
51  
52  
53  
54  
55  
56  
57  
58  
59  
60

|                                    |      |              |              |                  |     |     |     |
|------------------------------------|------|--------------|--------------|------------------|-----|-----|-----|
| <i>Sung et al. (146)</i>           | 2013 | Unstratified | None         | Outcome          | yes | no  | NA  |
| <i>Tiabau et al. (147)</i>         | 2018 | Unstratified | None         | Outcome          | no  | NA  | NA  |
| <i>Trinquart et al. (148)</i>      | 2018 | Unstratified | None         | Reporting        | no  | no  | NA  |
| <i>Tulikangas et al. (149)</i>     | 2006 | Unstratified | None         | Outcome          | no  | no  | NA  |
| <i>Tungaraza and Poole (150)</i>   | 2007 | Unstratified | Unstratified | Outcome          | no  | no  | no  |
| <i>Urrutia et al. (151)</i>        | 2016 | Unstratified | None         | Reporting        | no  | no  | NA  |
| <i>van den Bogert et al. (152)</i> | 2017 | Unstratified | None         | Quality          | no  | yes | NA  |
| <i>van Heteren et al. (153)</i>    | 2019 | Unstratified | None         | Reporting        | no  | NA  | NA  |
| <i>Van Lent et al. (154)</i>       | 2014 | Unstratified | None         | Outcome          | yes | NA  | NA  |
| <i>Venincasa et al. (155)</i>      | 2019 | Unstratified | Unstratified | Outcome          | no  | no  | no  |
| <i>Vlad et al. (156)</i>           | 2007 | Stratified   | Unstratified | Outcome, Quality | no  | NA  | no  |
| <i>Walkup et al. (157)</i>         | 2017 | Unstratified | None         | Outcome          | no  | no  | NA  |
| <i>Walter et al. (158)</i>         | 2020 | Unstratified | None         | Reporting        | no  | no  | NA  |
| <i>Waqas et al. (159)</i>          | 2019 | Unstratified | Unstratified | Outcome          | no  | no  | no  |
| <i>Welsb et al. (160)</i>          | 2018 | Unstratified | Unstratified | Reporting        | no  | NA  | no  |
| <i>Wise et al. (161)</i>           | 2021 | Unstratified | Unstratified | Outcome          | no  | yes | yes |
| <i>Wong et al. (162)</i>           | 2019 | Unstratified | None         | Outcome          | no  | no  | NA  |
| <i>Wortzel et al. (163)</i>        | 2020 | Unstratified | None         | Quality          | no  | NA  | NA  |
| <i>Xu et al. (164)</i>             | 2013 | Unstratified | None         | Safety           | no  | no  | NA  |
| <i>Yilmaz et al. (165)</i>         | 2018 | Unstratified | None         | Reporting        | no  | no  | NA  |
| <i>Youssef et al. (166)</i>        | 2016 | Unstratified | None         | Outcome          | no  | no  | NA  |
| <i>Zhang et al. (167)</i>          | 2013 | Unstratified | None         | Outcome, Safety  | no  | no  | NA  |

**Supplemental Table 2. Methodological Design Analysis for All Collected Articles.** Includes industry funding IV type, author COI IV type, DV type(s), COI as proxy, and dichotomization data.

### Supplemental References

1. Abildgaard JT, Chung AS, Tokish JM, Hattrup SJ. Clinical efficacy of liposomal bupivacaine: a systematic review of prospective, randomized controlled trials in orthopaedic surgery. *JBJS Rev.* 2019 Jul;7(7):e8.
2. Addeo A, Weiss GJ, Gyawali B. Association of industry and academic sponsorship with negative phase 3 oncology trials and reported outcomes on participant survival: A pooled analysis. *JAMA Netw Open.* 2019 May 3;2(5):e193684.
3. Ahmer S, Arya P, Anderson D, Faruqui R. Conflict of interest in psychiatry. *Psychiatric Bulletin.* 2005 Aug;29(8):302–4.
4. Ahn R, Woodbridge A, Abraham A, Saba S, Korenstein D, Madden E, et al. Financial ties of principal investigators and randomized controlled trial outcomes: cross sectional study. *BMJ.* 2017 Jan 17;356:i6770.
5. Alasbali T, Smith M, Geffen N, Trope GE, Flanagan JG, Jin Y, et al. Discrepancy between results and abstract conclusions in industry- vs nonindustry-funded studies comparing topical prostaglandins. *Am J Ophthalmol.* 2009 Jan;147(1):33-38.e2.

6. Als-Nielsen B, Chen W, Gluud C, Kjaergard LL. Association of funding and conclusions in randomized drug trials: a reflection of treatment effect or adverse events? *JAMA*. 2003 Aug 20;290(7):921–8.
7. Avni T, Shiber-Ofer S, Leibovici L, Paul M. Assessment of bias in outcomes reported in trials on pneumonia: a systematic review. *Eur J Clin Microbiol Infect Dis*. 2014 Jun;33(6):969–74.
8. Azad TD, Feng AY, Mehta S, Bak AB, Johnson E, Mittal V, et al. Randomized controlled trials in functional neurosurgery—association of device approval status and trial quality. *Neuromodulation: Technology at the Neural Interface*. 2020;23(4):496–501.
9. Azharuddin M, Adil M, Khan RA, Ghosh P, Kapur P, Sharma M. Systematic evidence of health economic evaluation of drugs for postmenopausal osteoporosis: A quality appraisal. *Osteoporosis and Sarcopenia*. 2020 Jun 1;6(2):39–52.
10. Barden J, Derry S, McQuay HJ, Moore AR. Bias from industry trial funding? A framework, a suggested approach, and a negative result. *Pain*. 2006 Apr;121(3):207–18.
11. Bariani GM, de Celis Ferrari ACR, Hoff PM, Krzyzanowska MK, Riechelmann RP. Self-reported conflicts of interest of authors, trial sponsorship, and the interpretation of editorials and related phase III trials in oncology. *J Clin Oncol*. 2013 Jun 20;31(18):2289–95.
12. Bartels RHMA, Delye H, Boogaarts J. Financial disclosures of authors involved in spine research: an underestimated source of bias. *Eur Spine J*. 2012 Jul;21(7):1229–33.
13. Bero L, Oostvogel F, Bacchetti P, Lee K. Factors associated with findings of published trials of drug-drug comparisons: why some statins appear more efficacious than others. *PLoS Med*. 2007 Jun;4(6):e184.
14. Bhandari M, Busse JW, Jackowski D, Montori VM, Schünemann H, Sprague S, et al. Association between industry funding and statistically significant pro-industry findings in medical and surgical randomized trials. *CMAJ*. 2004 Feb 17;170(4):477–80.
15. Bighelli I, Leucht C, Huhn M, Reitmeir C, Schwermann F, Wallis S, et al. Are randomized controlled trials on pharmacotherapy and psychotherapy for positive symptoms of schizophrenia comparable? a systematic review of patient and study characteristics. *Schizophr Bull*. 2020 Apr 10;46(3):496–504.
16. Bond K, Spooner C, Tjosvold L, Lemièrre C, Rowe BH. The nature and influence of pharmaceutical industry involvement in asthma trials. *Can Respir J*. 2012;19(4):267–71.
17. Booth CM, Cescon DW, Wang L, Tannock IF, Krzyzanowska MK. Evolution of the randomized controlled trial in oncology over three decades. *J Clin Oncol*. 2008 Nov 20;26(33):5458–64.
18. Bourgeois FT, Murthy S, Mandl KD. Outcome reporting among drug trials registered in ClinicalTrials.gov. *Ann Intern Med*. 2010 Aug 3;153(3):158–66.
19. Brown A, Kraft D, Schmitz SM, Sharpless V, Martin C, Shah R, et al. Association of industry sponsorship to published outcomes in gastrointestinal clinical research. *Clin Gastroenterol Hepatol*. 2006 Dec;4(12):1445–51.
20. Buchkowsky SS, Jewesson PJ. Industry sponsorship and authorship of clinical trials over 20 years. *Ann Pharmacother*. 2004 Apr;38(4):579–85.
21. Budhiraja P, Kaplan B, Kalot M, Alayli AE, Dimassi A, Chakkerla HA, et al. Current state of evidence on kidney transplantation: how fragile are the results? *Transplantation*. 2022 Feb 1;106(2):248–56.
22. Bugano DDG, Hess K, Jardim DLF, Zer A, Meric-Bernstam F, Siu LL, et al. Use of expansion cohorts in phase I trials and probability of success in phase II for 381 anticancer drugs. *Clin Cancer Res*. 2017 Aug 1;23(15):4020–6.
23. Catillon M. Trends and predictors of biomedical research quality, 1990-2015: A meta-research study. *BMJ Open*. 2019 Sep 1;9:e030342.
24. Chang MJ, Qiu Y, Lipner SR. Race reporting and representation in onychomycosis clinical trials: A systematic review. *Mycoses*. 2021 Aug;64(8):954–66.
25. Chard JA, Tallon D, Dieppe PA. Epidemiology of research into interventions for the treatment of osteoarthritis of the knee joint. *Ann Rheum Dis*. 2000 Jun;59(6):414–8.
26. Chen Y-P, Liu X, Lv J-W, Li W-F, Zhang Y, Guo Y, et al. Publication status of contemporary oncology randomised controlled trials worldwide. *Eur J Cancer*. 2016 Oct;66:17–25.

27. Cherla DV, Viso CP, Holihan JL, Bernardi K, Moses ML, Mueck KM, et al. The effect of financial conflict of interest, disclosure status, and relevance on medical research from the united states. *J Gen Intern Med.* 2019 Mar;34(3):429–34.
28. Cho MK, Bero LA. The quality of drug studies published in symposium proceedings. *Ann Intern Med.* 1996 Mar 1;124(5):485–9.
29. Clark O, Adams JR, Bennett CL, Djulbegovic B. Erythropoietin, uncertainty principle and cancer related anaemia. *BMC Cancer.* 2002 Sep 24;2:23.
30. Clifford TJ, Barrowman NJ, Moher D. Funding source, trial outcome and reporting quality: are they related? Results of a pilot study. *BMC Health Serv Res.* 2002 Sep 4;2(1):18.
31. Corona G, Isidori AM, Buvat J, Aversa A, Rastrelli G, Hackett G, et al. Testosterone supplementation and sexual function: a meta-analysis study. *J Sex Med.* 2014 Jun;11(6):1577–92.
32. Corona G, Maseroli E, Rastrelli G, Isidori AM, Sforza A, Mannucci E, et al. Cardiovascular risk associated with testosterone-boosting medications: a systematic review and meta-analysis. *Expert Opin Drug Saf.* 2014 Oct;13(10):1327–51.
33. Cristea IA, Gentili C, Pietrini P, Cuijpers P. Is investigator background related to outcome in head to head trials of psychotherapy and pharmacotherapy for adult depression? A systematic review and meta-analysis. *PLoS One.* 2017;12(2):e0171654.
34. Crocetti MT, Amin DD, Scherer R. Assessment of risk of bias among pediatric randomized controlled trials. *Pediatrics.* 2010 Aug;126(2):298–305.
35. Vrljićak Davidović N, Komić L, Mešin I, Kotarac M, Okmažić D, Franić T. Registry versus publication: discrepancy of primary outcomes and possible outcome reporting bias in child and adolescent mental health. *Eur Child Adolesc Psychiatry.* 2021 Jan 18;
36. Davidson RA. Source of funding and outcome of clinical trials. *J Gen Intern Med.* 1986 Jun;1(3):155–8.
37. Davis JM, Chen N, Glick ID. Issues that may determine the outcome of antipsychotic trials: industry sponsorship and extrapyramidal side effect. *Neuropsychopharmacology.* 2008 Apr;33(5):971–5.
38. de Souza Gutierrez B, Aguiar PN, Dourado BB, Alves AL, Matsas S, Simões AR, et al. Evidence strength of pharmaceutical industry-funded clinical trials in metastatic nscl: a comparison with other sources of funding. *J Thorac Oncol.* 2020 Jul;15(7):1170–6.
39. DeFrance MJ, Yayac MF, Courtney PM, Squire MW. The impact of author financial conflicts on robotic-assisted joint arthroplasty research. *J Arthroplasty.* 2021 Apr;36(4):1462–9.
40. DeGeorge BR, Holland MC, Drake DB. The impact of conflict of interest in abdominal wall reconstruction with acellular dermal matrix. *Ann Plast Surg.* 2015 Feb;74(2):242–7.
41. Del Paggio JC, Azariah B, Sullivan R, Hopman WM, James FV, Roshni S, et al. Do contemporary randomized controlled trials meet ESMO thresholds for meaningful clinical benefit? *Ann Oncol.* 2017 Jan 1;28(1):157–62.
42. Falk Delgado A, Falk Delgado A. The association of funding source on effect size in randomized controlled trials: 2013-2015 - a cross-sectional survey and meta-analysis. *Trials.* 2017 Mar 14;18(1):125.
43. Falk Delgado A, Falk Delgado A. Outcome switching in randomized controlled oncology trials reporting on surrogate endpoints: a cross-sectional analysis. *Sci Rep.* 2017 Aug 23;7:9206.
44. DePasse JM, Park S, Eltorai AEM, Daniels AH. Factors predicting publication of spinal cord injury trials registered on www.ClinicalTrials.gov. *J Back Musculoskelet Rehabil.* 2018 Feb 6;31(1):45–8.
45. DeVito NJ, Bacon S, Goldacre B. Compliance with legal requirement to report clinical trial results on ClinicalTrials.gov: a cohort study. *Lancet.* 2020 Feb 1;395(10221):361–9.
46. Djulbegovic B, Lacevic M, Cantor A, Fields KK, Bennett CL, Adams JR, et al. The uncertainty principle and industry-sponsored research. *Lancet.* 2000 Aug 19;356(9230):635–8.
47. Djulbegovic B, Kumar A, Miladinovic B, Reljic T, Galeb S, Mhaskar A, et al. Treatment success in cancer: industry compared to publicly sponsored randomized controlled trials. *PLoS One.* 2013;8(3):e58711.
48. Etter J-F, Burri M, Stapleton J. The impact of pharmaceutical company funding on results of randomized trials of nicotine replacement therapy for smoking cessation: a meta-analysis. *Addiction.* 2007 May;102(5):815–22.

49. Finucane TE, Boulton CE. Association of funding and findings of pharmaceutical research at a meeting of a medical professional society. *Am J Med.* 2004 Dec 1;117(11):842–5.
50. Flacco ME, Manzoli L, Boccia S, Capasso L, Aleksovska K, Rosso A, et al. Head-to-head randomized trials are mostly industry sponsored and almost always favor the industry sponsor. *J Clin Epidemiol.* 2015 Jul;68(7):811–20.
51. Fraguas D, Díaz-Caneja CM, Pina-Camacho L, Umbricht D, Arango C. Predictors of placebo response in pharmacological clinical trials of negative symptoms in schizophrenia: a meta-regression analysis. *Schizophr Bull.* 2019 Jan 1;45(1):57–68.
52. Freemantle N, Anderson IM, Young P. Predictive value of pharmacological activity for the relative efficacy of antidepressant drugs. Meta-regression analysis. *Br J Psychiatry.* 2000 Oct;177:292–302.
53. Fung M, Yuan Y, Atkins H, Shi Q, Bubela T. Responsible translation of stem cell research: an assessment of clinical trial registration and publications. *Stem Cell Reports.* 2017 May 9;8(5):1190–201.
54. Gabler NB, Duan N, Ranases E, Suttner L, Ciarametaro M, Cooney E, et al. No improvement in the reporting of clinical trial subgroup effects in high-impact general medical journals. *Trials.* 2016 Jul 16;17(1):320.
55. Gan HK, You B, Pond GR, Chen EX. Assumptions of expected benefits in randomized phase III trials evaluating systemic treatments for cancer. *J Natl Cancer Inst.* 2012 Apr 18;104(8):590–8.
56. Gao Y, Ge L, Ma X, Shen X, Liu M, Tian J. Improvement needed in the network geometry and inconsistency of Cochrane network meta-analyses: a cross-sectional survey. *J Clin Epidemiol.* 2019 Sep;113:214–27.
57. Gartlehner G, Morgan L, Thieda P, Fleg A. The effect of study sponsorship on a systematically evaluated body of evidence of head-to-head trials was modest: secondary analysis of a systematic review. *J Clin Epidemiol.* 2010 Feb;63(2):117–25.
58. Gaudino M, Hameed I, Rahouma M, Khan FM, Tam DY, Biondi-Zoccai G, et al. Characteristics of contemporary randomized clinical trials and their association with the trial funding source in invasive cardiovascular interventions. *JAMA Intern Med.* 2020 Jul 1;180(7):993–1001.
59. González-González JG, Dorsey-Treviño EG, Alvarez-Villalobos N, Barrera-Flores FJ, Díaz González-Colmenero A, Quintanilla-Sánchez C, et al. Trustworthiness of randomized trials in endocrinology-A systematic survey. *PLoS One.* 2019;14(2):e0212360.
60. Grey P, Grey A, Bolland MJ. Outcomes, interventions and funding in randomised research published in high-impact journals. *Trials.* 2018 Oct 29;19(1):592.
61. Gyawali B, Tessema FA, Jung EH, Kesselheim AS. Assessing the justification, funding, success, and survival outcomes of randomized noninferiority trials of cancer drugs: a systematic review and pooled analysis. *JAMA Netw Open.* 2019 Aug 2;2(8):e199570.
62. Hajibandeh S, Hajibandeh S, Antoniou SA, Antoniou GA, Torella F. Industry sponsorship and positive outcome in vascular and endovascular randomised trials. *Vasa.* 2017 Jan;46(1):67–8.
63. Halpern SD, Barton TD, Gross R, Hennessy S, Berlin JA, Strom BL. Epidemiologic studies of adverse effects of anti-retroviral drugs: how well is statistical power reported. *Pharmacoepidemiol Drug Saf.* 2005 Mar;14(3):155–61.
64. Hanna E, Rémuzat C, Auquier P, Toumi M. Risk of discontinuation of Advanced Therapy Medicinal Products clinical trials. *J Mark Access Health Policy.* 2016;4.
65. Hashemipour MA, Pourmonajemzadeh S, Zoghritavana S, Navabi N. Relationship between declarations of conflict of interests and reporting positive outcomes in Iranian dental journals. *Sci Eng Ethics.* 2019 Aug;25(4):1057–67.
66. Hengartner MP, Amendola S, Kaminski JA, Kindler S, Bschor T, Plöderl M. Suicide risk with selective serotonin reuptake inhibitors and other new-generation antidepressants in adults: a systematic review and meta-analysis of observational studies. *J Epidemiol Community Health.* 2021 Mar 8;jech-2020-214611.
67. Heres S, Davis J, Maino K, Jetzinger E, Kissling W, Leucht S. Why olanzapine beats risperidone, risperidone beats quetiapine, and quetiapine beats olanzapine: an exploratory analysis of head-to-head comparison studies of second-generation antipsychotics. *Am J Psychiatry.* 2006 Feb;163(2):185–94.

68. Janiaud P, Cristea I-A, Ioannidis JPA. Industry-funded versus non-profit-funded critical care research: a meta-epidemiological overview. *Intensive Care Med.* 2018 Oct;44(10):1613–27.
69. Jefferson T, Di Pietrantonj C, Debalini MG, Rivetti A, Demicheli V. Relation of study quality, concordance, take home message, funding, and impact in studies of influenza vaccines: systematic review. *BMJ.* 2009 Feb 12;338:b354.
70. Jellison S, Roberts W, Bowers A, Combs T, Beaman J, Wayant C, et al. Evaluation of spin in abstracts of papers in psychiatry and psychology journals. *BMJ Evid Based Med.* 2019 Aug 5;178–81.
71. Jinapriya D, Anraku A, Alasbali T, Trope GE, Buys YM. Evaluation of investigator bias in industry-funded clinical trials of latanoprost. *Can J Ophthalmol.* 2011 Dec;46(6):531–6.
72. Johnson AL, Fladie I, Anderson JM, Lewis DM, Mons BR, Vassar M. Rates of discontinuation and nonpublication of head and neck cancer randomized clinical trials. *JAMA Otolaryngol Head Neck Surg.* 2020 Feb 1;146(2):176–82.
73. Jones R, Younie S, Macallister A, Thornton J. A comparison of the scientific quality of publicly and privately funded randomized controlled drug trials. *J Eval Clin Pract.* 2010 Dec;16(6):1322–5.
74. Kakkar AK, Padhy BM, Sarangi SC, Gupta YK. Methodological characteristics of clinical trials: impact of mandatory trial registration. *J Pharm Pharm Sci.* 2019;22(1):131–41.
75. Kapelios CJ, Naci H, Vardas PE, Mossialos E. Study design, result posting and publication of late-stage cardiovascular trials. *Eur Heart J Qual Care Clin Outcomes.* 2020 Oct 24;qcaa080.
76. Kelly R, Cohen L, Semple R, Bialer P, Lau A, Bodenheimer A, et al. Relationship between drug company funding and outcomes of clinical psychiatric research. *Psychological medicine.* 2006 Dec 1;36:1647–56.
77. Kemmeren JM, Algra A, Grobbee DE. Third generation oral contraceptives and risk of venous thrombosis: meta-analysis. *BMJ.* 2001 Jul 21;323(7305):131–4.
78. Khan NA, Lombeida JI, Singh M, Spencer HJ, Torralba KD. Association of industry funding with the outcome and quality of randomized controlled trials of drug therapy for rheumatoid arthritis. *Arthritis Rheum.* 2012 Jul;64(7):2059–67.
79. Killin LOJ, Russ TC, Starr JM, Abrahams S, Della Sala S. The effect of funding sources on donepezil randomised controlled trial outcome: a meta-analysis. *BMJ Open.* 2014 Apr 7;4(4):e004083.
80. Kjaergard LL, Als-Nielsen B. Association between competing interests and authors' conclusions: epidemiological study of randomised clinical trials published in the BMJ. *BMJ.* 2002 Aug 3;325(7358):249.
81. Lee KC, Wu BW, Chuang S-K. Which factors affect the completion and publication of dental implant trials? *J Oral Maxillofac Surg.* 2020 Oct;78(10):1726–35.
82. Lee Y-K, Chung CY, Koo K-H, Lee KM, Ji H-M, Park MS. Conflict of interest in the assessment of thromboprophylaxis after total joint arthroplasty: a systematic review. *J Bone Joint Surg Am.* 2012 Jan 4;94(1):27–33.
83. Leite ETT, Moraes FY, Marta GN, Taunk NK, Vieira MTL, Hanna SA, et al. Trial sponsorship and self-reported conflicts of interest in breast cancer radiation therapy: An analysis of prospective clinical trials. *Breast.* 2017 Jun;33:29–33.
84. Leucht S, Chaimani A, Mavridis D, Leucht C, Huhn M, Helfer B, et al. Disconnection of drug-response and placebo-response in acute-phase antipsychotic drug trials on schizophrenia? Meta-regression analysis. *Neuropsychopharmacology.* 2019 Oct;44(11):1955–66.
85. Leucht S, Leucht C, Huhn M, Chaimani A, Mavridis D, Helfer B, et al. Sixty years of placebo-controlled antipsychotic drug trials in acute schizophrenia: systematic review, bayesian meta-analysis, and meta-regression of efficacy predictors. *Am J Psychiatry.* 2017 Oct 1;174(10):927–42.
86. Liang F, Zhu J, Mo M, Zhou CM, Jia HX, Xie L, et al. Role of industry funders in oncology RCTs published in high-impact journals and its association with trial conclusions and time to publication. *Ann Oncol.* 2018 Oct 1;29(10):2129–34.
87. Liss H. Publication bias in the pulmonary/allergy literature: effect of pharmaceutical company sponsorship. *Isr Med Assoc J.* 2006 Jul;8(7):451–4.

- 1
  - 2
  - 3
  - 4
  - 5
  - 6
  - 7
  - 8
  - 9
  - 10
  - 11
  - 12
  - 13
  - 14
  - 15
  - 16
  - 17
  - 18
  - 19
  - 20
  - 21
  - 22
  - 23
  - 24
  - 25
  - 26
  - 27
  - 28
  - 29
  - 30
  - 31
  - 32
  - 33
  - 34
  - 35
  - 36
  - 37
  - 38
  - 39
  - 40
  - 41
  - 42
  - 43
  - 44
  - 45
  - 46
  - 47
  - 48
  - 49
  - 50
  - 51
  - 52
  - 53
  - 54
  - 55
  - 56
  - 57
  - 58
  - 59
  - 60
88. Liu X, Zhang Y, Tang L-L, Le QT, Chua MLK, Wee JTS, et al. Characteristics of radiotherapy trials compared with other oncological clinical trials in the past 10 years. *JAMA Oncol*. 2018 Aug 1;4(8):1073–9.
89. Lubowitz JH, Appleby D, Centeno JM, Woolf SK, Reid JB. The relationship between the outcome of studies of autologous chondrocyte implantation and the presence of commercial funding. *Am J Sports Med*. 2007 Nov;35(11):1809–16.
90. Lynch J, Cunningham M, Warne W, Schaad D, Wolf F, Leopold S. Commercially funded and united states-based research is more likely to be published; good-quality studies with negative outcomes are not. *The Journal of bone and joint surgery American volume*. 2007 Jun 1;89:1010–8.
91. Ma D, Zhang Z, Zhang X, Li L. Comparative efficacy, acceptability, and safety of medicinal, cognitive-behavioral therapy, and placebo treatments for acute major depressive disorder in children and adolescents: a multiple-treatments meta-analysis. *Curr Med Res Opin*. 2014 Jun;30(6):971–95.
92. Magnani CJ, Steinberg JR, Harmange CI, Zhang X, Driscoll C, Bell A, et al. Clinical trial outcomes in urology: assessing early discontinuation, results reporting and publication in clinicaltrials.gov registrations 2007-2019. *J Urol*. 2021 Apr;205(4):1159–68.
93. Maillet D, Blay JY, You B, Rachdi A, Gan HK, Péron J. The reporting of adverse events in oncology phase III trials: a comparison of the current status versus the expectations of the EORTC members. *Ann Oncol*. 2016 Jan;27(1):192–8.
94. Malek E, Saygin C, Ye R, Covut F, Kim B-G, Welge J, et al. Predicting successful phase advancement and regulatory approval in multiple myeloma from phase I overall response rates. *JCO Clin Cancer Inform*. 2017 Nov;1:1–14.
95. Mian MK, Sreedharan S, Limaye NS, Hogan C, Darvall JN. Research trends in anticoagulation therapy over the last 25 years. *Semin Thromb Hemost*. 2020 Nov;46(8):919–31.
96. Mitchell JM, Patterson JA. The Inclusion of Economic Endpoints as Outcomes in Clinical Trials Reported to ClinicalTrials.gov. *J Manag Care Spec Pharm*. 2020 Apr;26(4):386–93.
97. Momeni A, Becker A, Bannasch H, Antes G, Blümle A, Stark GB. Association between research sponsorship and study outcome in plastic surgery literature. *Ann Plast Surg*. 2009 Dec;63(6):661–4.
98. Moncrieff J. Clozapine v. conventional antipsychotic drugs for treatment-resistant schizophrenia: a re-examination. *Br J Psychiatry*. 2003 Aug;183:161–6.
99. Montgomery JH, Byerly M, Carmody T, Li B, Miller DR, Varghese F, et al. An analysis of the effect of funding source in randomized clinical trials of second generation antipsychotics for the treatment of schizophrenia. *Control Clin Trials*. 2004 Dec;25(6):598–612.
100. Moraes FY, Mendez LC, Taunk NK, Raman S, Suh JH, Souhami L, et al. Funding source, conflict of interest and positive conclusions in neuro-oncology clinical trials. *J Neurooncol*. 2018 Feb;136(3):585–93.
101. Mossman SA, Mills JA, Walkup JT, Strawn JR. The impact of failed antidepressant trials on outcomes in children and adolescents with anxiety and depression: a systematic review and meta-analysis. *J Child Adolesc Psychopharmacol*. 2021 May;31(4):259–67.
102. Naci H, Dias S, Ades AE. Industry sponsorship bias in research findings: a network meta-analysis of LDL cholesterol reduction in randomised trials of statins. *BMJ*. 2014 Oct 3;349:g5741.
103. Ng T, Mazzarello S, Wang Z, Hutton B, Dranitsaris G, Vandermeer L, et al. Choice of study endpoint significantly impacts the results of breast cancer trials evaluating chemotherapy-induced nausea and vomiting. *Breast Cancer Res Treat*. 2016 Jan;155(2):337–44.
104. Nieto A, Mazon A, Pamies R, Linana JJ, Lanuza A, Jiménez FO, et al. Adverse effects of inhaled corticosteroids in funded and nonfunded studies. *Arch Intern Med*. 2007 Oct 22;167(19):2047–53.
105. Nithianandan H, Kuriyan AE, Venincasa MJ, Sridhar J. Analysis of Funding Source and Spin in the Reporting of Studies of Intravitreal Corticosteroid Therapy for Diabetic Macular Edema: A Systematic Review. *Clin Ophthalmol*. 2020;14:2383–95.
106. Odutayo A, Emdin CA, Hsiao AJ, Shakir M, Copsey B, Dutton S, et al. Association between trial registration and positive study findings: cross sectional study (Epidemiological Study of Randomized Trials-ESORT). *BMJ*. 2017 Mar 14;356:j917.

107. Del Paggio JC, Berry JS, Hopman WM, Eisenhauer EA, Prasad V, Gyawali B, et al. Evolution of the Randomized Clinical Trial in the Era of Precision Oncology. *JAMA Oncol.* 2021 May 1;7(5):728–34.
108. Pasalic D, McGinnis GJ, Fuller CD, Grossberg AJ, Verma V, Mainwaring W, et al. Progression-free survival is a suboptimal predictor for overall survival among metastatic solid tumour clinical trials. *Eur J Cancer.* 2020 Sep;136:176–85.
109. Pengel LHM, Barcena L, Morris PJ. The quality of reporting of randomized controlled trials in solid organ transplantation. *Transpl Int.* 2009 Apr;22(4):377–84.
110. Pepper DJ, Sun J, Rhee C, Welsh J, Powers JH, Danner RL, et al. Procalcitonin-guided antibiotic discontinuation and mortality in critically ill adults. *Chest.* 2019 Jun;155(6):1109–18.
111. Peppercorn J, Blood E, Winer E, Partridge A. Association between pharmaceutical involvement and outcomes in breast cancer clinical trials. *Cancer.* 2007 Apr 1;109(7):1239–46.
112. Perlis CS, Harwood M, Perlis RH. Extent and impact of industry sponsorship conflicts of interest in dermatology research. *J Am Acad Dermatol.* 2005 Jun;52(6):967–71.
113. Perlis RH, Perlis CS, Wu Y, Hwang C, Joseph M, Nierenberg AA. Industry sponsorship and financial conflict of interest in the reporting of clinical trials in psychiatry. *Am J Psychiatry.* 2005 Oct;162(10):1957–60.
114. Popelut A, Valet F, Fromentin O, Thomas A, Bouchard P. Relationship between sponsorship and failure rate of dental implants: a systematic approach. *PLoS One.* 2010 Apr 21;5(4):e10274.
115. Pouwels XGLV, Ramaekers BLT, Joore MA. Reviewing the quality, health benefit and value for money of chemotherapy and targeted therapy for metastatic breast cancer. *Breast Cancer Res Treat.* 2017 Oct;165(3):485–98.
116. Prakash VS, Mansukhani NA, Helenowski IB, Woodruff TK, Kibbe MR. Sex bias in interventional clinical trials. *J Womens Health (Larchmt).* 2018 Nov;27(11):1342–8.
117. Price-Haywood EG, Harden-Barrios J, Carr C, Reddy L, Bazzano LA, van Driel ML. Patient-reported outcomes in stroke clinical trials 2002-2016: a systematic review. *Qual Life Res.* 2019 May;28(5):1119–28.
118. Printz JO, Lee JJ, Knesek M, Urquhart AG. Conflict of interest in the assessment of hyaluronic acid injections for osteoarthritis of the knee: an updated systematic review. *J Arthroplasty.* 2013 Sep;28(8 Suppl):30-33.e1.
119. Probst P, Knebel P, Grummich K, Tenckhoff S, Ulrich A, Büchler MW, et al. Industry bias in randomized controlled trials in general and abdominal surgery: an empirical study. *Ann Surg.* 2016 Jul;264(1):87–92.
120. Punja S, Shamseer L, Hartling L, Urichuk L, Vandermeer B, Nikles J, et al. Amphetamines for attention deficit hyperactivity disorder (ADHD) in children and adolescents. *Cochrane Database Syst Rev.* 2016 Feb 4;2:CD009996.
121. Putman MS, Harrison Ragle A, Ruderman EM. The quality of randomized controlled trials in high-impact rheumatology journals, 1998-2018. *J Rheumatol.* 2020 Sep 1;47(9):1446–9.
122. Raman S, Moraes FY, Mendez LC, Taunk NK, Suh JH, Souhami L, et al. The relationship of study and authorship characteristics on trial sponsorship and self-reported conflicts of interest among neuro-oncology clinical trials. *J Neurooncol.* 2018 Aug;139(1):195–203.
123. Rasmussen N, Lee K, Bero L. Association of trial registration with the results and conclusions of published trials of new oncology drugs. *Trials.* 2009 Dec 16;10:116.
124. Rattinger G, Bero L. Factors associated with results and conclusions of trials of thiazolidinediones. *PLoS One.* 2009 Jun 8;4(6):e5826.
125. Reda S, Elhennawy K, Meyer-Lückel H, Paris S, Schwendicke F. Industry sponsorship in trials on fluoride varnish or gels for caries prevention. *Community Dent Oral Epidemiol.* 2017 Aug;45(4):289–95.
126. Rees CA, Pica N, Monuteaux MC, Bourgeois FT. Noncompletion and nonpublication of trials studying rare diseases: A cross-sectional analysis. *PLoS Med.* 2019 Nov 21;16(11):e1002966.
127. Ridker PM, Torres J. Reported outcomes in major cardiovascular clinical trials funded by for-profit and not-for-profit organizations: 2000-2005. *JAMA.* 2006 May 17;295(19):2270–4.

128. Rios LP, Oduyungbo A, Moitri MO, Rahman MO, Thabane L. Quality of reporting of randomized controlled trials in general endocrinology literature. *J Clin Endocrinol Metab.* 2008 Oct;93(10):3810–6.
129. Rochon PA, Gurwitz JH, Simms RW, Fortin PR, Felson DT, Minaker KL, et al. A study of manufacturer-supported trials of nonsteroidal anti-inflammatory drugs in the treatment of arthritis. *Arch Intern Med.* 1994 Jan 24;154(2):157–63.
130. Roddick AJ, Chan FTS, Stefaniak JD, Zheng SL. Discontinuation and non-publication of clinical trials in cardiovascular medicine. *Int J Cardiol.* 2017 Oct 1;244:309–15.
131. Roper N, Zhang N, Korenstein D. Industry collaboration and randomized clinical trial design and outcomes. *JAMA Intern Med.* 2014 Oct;174(10):1695–6.
132. Rösner S, Hackl-Herrwerth A, Leucht S, Lehert P, Vecchi S, Soyka M. Acamprosate for alcohol dependence. *Cochrane Database Syst Rev.* 2010 Sep 8;(9):CD004332.
133. Rösner S, Hackl-Herrwerth A, Leucht S, Vecchi S, Srisurapanont M, Soyka M. Opioid antagonists for alcohol dependence. *Cochrane Database Syst Rev.* 2010 Dec 8;(12):CD001867.
134. Saa C, Bunout D, Hirsch S. Industry funding effect on positive results of probiotic use in the management of acute diarrhea: a systematized review. *Eur J Gastroenterol Hepatol.* 2019 Mar;31(3):289–302.
135. Saleh RR, Meti N, Ribnikar D, Goldvaser H, Ocana A, Templeton AJ, et al. Associations between safety, tolerability, and toxicity and the reporting of health-related quality of life in phase III randomized trials in common solid tumors. *Cancer Med.* 2020 Nov;9(21):7888–95.
136. Sendyk DI, Rovai ES, Souza NV, Deboni MCZ, Pannuti CM. Selective outcome reporting in randomized clinical trials of dental implants. *J Clin Periodontol.* 2019 Jul;46(7):758–65.
137. Shepard S, Wise A, Johnson BS, Sajjadi NB, Hartwell M, Vassar M. Are randomized controlled trials in urology being conducted with justification? *J Osteopath Med.* 2021 May 21;121(8):665–71.
138. Silva MA, Duarte GS, Camara R, Rodrigues FB, Fernandes RM, Abreu D, et al. Placebo and nocebo responses in restless legs syndrome: A systematic review and meta-analysis. *Neurology.* 2017 Jun 6;88(23):2216–24.
139. Simonetti RG, Perricone G, Nikolova D, Bjelakovic G, Gluud C. Plasma expanders for people with cirrhosis and large ascites treated with abdominal paracentesis. *Cochrane Database Syst Rev.* 2019 Jun 28;6:CD004039.
140. Sinyor M, Schaffer A, Smart KA, Levitt AJ, Lanctôt KL, Grysman NH. Sponsorship, antidepressant dose, and outcome in major depressive disorder: meta-analysis of randomized controlled trials. *J Clin Psychiatry.* 2012 Feb;73(2):e277-287.
141. Son C, Tavakoli S, Bartanusz V. No publication bias in industry funded clinical trials of degenerative diseases of the spine. *J Clin Neurosci.* 2016 Mar;25:58–61.
142. Spanemberg L, Massuda R, Lovato L, Paim L, Vares EA, Sica da Rocha N, et al. Pharmacological treatment of bipolar depression: qualitative systematic review of double-blind randomized clinical trials. *Psychiatr Q.* 2012 Jun;83(2):161–75.
143. Sriganesh K, Bharadwaj S, Wang M, Abbade LPF, Jin Y, Philip M, et al. Quality of abstracts of randomized control trials in five top pain journals: A systematic survey. *Contemp Clin Trials Commun.* 2017 Sep;7:64–8.
144. Stefaniak JD, Lam TCH, Sim NE, Al-Shahi Salman R, Breen DP. Discontinuation and non-publication of neurodegenerative disease trials: a cross-sectional analysis. *Eur J Neurol.* 2017 Aug;24(8):1071–6.
145. Steffens ANV, Langerhuizen DWG, Doornberg JN, Ring D, Janssen SJ. Emotional tones in scientific writing: comparison of commercially funded studies and non-commercially funded orthopedic studies. *Acta Orthop.* 2021 Apr;92(2):240–3.
146. Sung KH, Chung CY, Lee KM, Lee Y-K, Lee SY, Lee J, et al. Conflict of interest in the assessment of botulinum toxin A injections in patients with cerebral palsy: a systematic review. *J Pediatr Orthop.* 2013 Aug;33(5):494–500.
147. Tibau A, Anguera G, Andrés-Pretel F, Templeton AJ, Seruga B, Barnadas A, et al. Role of cooperative groups and funding source in clinical trials supporting guidelines for systemic therapy of breast cancer. *Oncotarget.* 2018 Mar 13;9(19):15061–7.



148. Trinquart L, Dunn AG, Bourgeois FT. Registration of published randomized trials: a systematic review and meta-analysis. *BMC Med*. 2018 Oct 16;16(1):173.
149. Tulikangas PK, Ayers A, O'Sullivan DM. A meta-analysis comparing trials of antimuscarinic medications funded by industry or not. *BJU Int*. 2006 Aug;98(2):377–80.
150. Tungaraza T, Poole R. Influence of drug company authorship and sponsorship on drug trial outcomes. *Br J Psychiatry*. 2007 Jul;191:82–3.
151. Urrútia G, Ballesteros M, Djulbegovic B, Gich I, Roqué M, Bonfill X. Cancer randomized trials showed that dissemination bias is still a problem to be solved. *J Clin Epidemiol*. 2016 Sep;77:84–90.
152. van den Bogert CA, Souverein PC, Brekelmans CTM, Janssen SWJ, Koëter GH, Leufkens HGM, et al. Primary endpoint discrepancies were found in one in ten clinical drug trials. Results of an inception cohort study. *J Clin Epidemiol*. 2017 Sep;89:199–208.
153. van Heteren JAA, van Beurden I, Peters JPM, Smit AL, Stegeman I. Trial registration, publication rate and characteristics in the research field of otology: A cross-sectional study. *PLoS One*. 2019;14(7):e0219458.
154. van Lent M, Overbeke J, Out HJ. Role of editorial and peer review processes in publication bias: analysis of drug trials submitted to eight medical journals. *PLoS One*. 2014;9(8):e104846.
155. Venincasa MJ, Kuriyan AE, Sridhar J. Effect of funding source on reporting bias in studies of intravitreal anti-vascular endothelial growth factor therapy for retinal vein occlusion. *Acta Ophthalmol*. 2019 Mar;97(2):e296–302.
156. Vlad SC, LaValley MP, McAlindon TE, Felson DT. Glucosamine for pain in osteoarthritis: why do trial results differ? *Arthritis Rheum*. 2007 Jul;56(7):2267–77.
157. Walkup JT. Antidepressant efficacy for depression in children and adolescents: industry- and NIMH-funded studies. *Am J Psychiatry*. 2017 May 1;174(5):430–7.
158. Walter SD, Han H, Guyatt GH, Bassler D, Bhatnagar N, Gloy V, et al. A systematic survey of randomised trials that stopped early for reasons of futility. *BMC Med Res Methodol*. 2020 Jan 16;20(1):10.
159. Waqas A, Baig AA, Khalid MA, Aedma KK, Naveed S. Conflicts of interest and outcomes of clinical trials of antidepressants: an 18-year retrospective study. *J Psychiatr Res*. 2019 Sep;116:83–7.
160. Welsh J, Lu Y, Dhruva SS, Bikdeli B, Desai NR, Benchetrit L, et al. Age of data at the time of publication of contemporary clinical trials. *JAMA Netw Open*. 2018 Aug 3;1(4):e181065.
161. Wise A, Mannem D, Anderson JM, Weaver M, Hartwell M, Vassar M. Do author conflicts of interest and industry sponsorship influence outcomes of systematic reviews and meta-analyses regarding glaucoma interventions? a cross-sectional analysis. *J Glaucoma*. 2021 Apr 1;30(4):293–9.
162. Wong CH, Siah KW, Lo AW. Estimation of clinical trial success rates and related parameters. *Biostatistics*. 2019 Apr 1;20(2):273–86.
163. Wortzel JR, Turner BE, Weeks BT, Fragassi C, Ramos V, Truong T, et al. Trends in mental health clinical research: Characterizing the ClinicalTrials.gov registry from 2007-2018. *PLoS One*. 2020;15(6):e0233996.
164. Xu L, Freeman G, Cowling BJ, Schooling CM. Testosterone therapy and cardiovascular events among men: a systematic review and meta-analysis of placebo-controlled randomized trials. *BMC Med*. 2013 Apr 18;11:108.
165. Yilmaz T, Jutten RJ, Santos CY, Hernandez KA, Snyder PJ. Discontinuation and nonpublication of interventional clinical trials conducted in patients with mild cognitive impairment and Alzheimer's disease. *Alzheimers Dement (N Y)*. 2018;4:161–4.
166. Youssef MA, Abou-Setta AM, Lam WS. Recombinant versus urinary human chorionic gonadotrophin for final oocyte maturation triggering in IVF and ICSI cycles. *Cochrane Database Syst Rev*. 2016 Apr 23;4:CD003719.
167. Zhang J-P, Gallego JA, Robinson DG, Malhotra AK, Kane JM, Correll CU. Efficacy and safety of individual second-generation vs. first-generation antipsychotics in first-episode psychosis: a systematic review and meta-analysis. *Int J Neuropsychopharmacol*. 2013 Jul;16(6):1205–18.

## Preferred Reporting Items for Systematic reviews and Meta-Analyses extension for Scoping Reviews (PRISMA-ScR) Checklist

| SECTION                                               | ITEM | PRISMA-ScR CHECKLIST ITEM                                                                                                                                                                                                                                                                                  | REPORTED ON PAGE # |
|-------------------------------------------------------|------|------------------------------------------------------------------------------------------------------------------------------------------------------------------------------------------------------------------------------------------------------------------------------------------------------------|--------------------|
| <b>TITLE</b>                                          |      |                                                                                                                                                                                                                                                                                                            |                    |
| Title                                                 | 1    | Identify the report as a scoping review. (Methodological review)                                                                                                                                                                                                                                           | 1                  |
| <b>ABSTRACT</b>                                       |      |                                                                                                                                                                                                                                                                                                            |                    |
| Structured summary                                    | 2    | Provide a structured summary that includes (as applicable): background, objectives, eligibility criteria, sources of evidence, charting methods, results, and conclusions that relate to the review questions and objectives.                                                                              | 1                  |
| <b>INTRODUCTION</b>                                   |      |                                                                                                                                                                                                                                                                                                            |                    |
| Rationale                                             | 3    | Describe the rationale for the review in the context of what is already known. Explain why the review questions/objectives lend themselves to a scoping review approach.                                                                                                                                   | 3-7                |
| Objectives                                            | 4    | Provide an explicit statement of the questions and objectives being addressed with reference to their key elements (e.g., population or participants, concepts, and context) or other relevant key elements used to conceptualize the review questions and/or objectives.                                  | 6-7                |
| <b>METHODS</b>                                        |      |                                                                                                                                                                                                                                                                                                            |                    |
| Protocol and registration                             | 5    | Indicate whether a review protocol exists; state if and where it can be accessed (e.g., a Web address); and if available, provide registration information, including the registration number.                                                                                                             | NA                 |
| Eligibility criteria                                  | 6    | Specify characteristics of the sources of evidence used as eligibility criteria (e.g., years considered, language, and publication status), and provide a rationale.                                                                                                                                       | 8                  |
| Information sources*                                  | 7    | Describe all information sources in the search (e.g., databases with dates of coverage and contact with authors to identify additional sources), as well as the date the most recent search was executed.                                                                                                  | 8                  |
| Search                                                | 8    | Present the full electronic search strategy for at least 1 database, including any limits used, such that it could be repeated.                                                                                                                                                                            | 8; supp            |
| Selection of sources of evidence†                     | 9    | State the process for selecting sources of evidence (i.e., screening and eligibility) included in the scoping review.                                                                                                                                                                                      | 8-9                |
| Data charting process‡                                | 10   | Describe the methods of charting data from the included sources of evidence (e.g., calibrated forms or forms that have been tested by the team before their use, and whether data charting was done independently or in duplicate) and any processes for obtaining and confirming data from investigators. | 9-10               |
| Data items                                            | 11   | List and define all variables for which data were sought and any assumptions and simplifications made.                                                                                                                                                                                                     | 9-10               |
| Critical appraisal of individual sources of evidence§ | 12   | If done, provide a rationale for conducting a critical appraisal of included sources of evidence; describe the methods used and how this information was used in any data synthesis (if appropriate).                                                                                                      | NA                 |

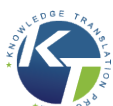

| SECTION                                       | ITEM | PRISMA-ScR CHECKLIST ITEM                                                                                                                                                                       | REPORTED ON PAGE # |
|-----------------------------------------------|------|-------------------------------------------------------------------------------------------------------------------------------------------------------------------------------------------------|--------------------|
| Synthesis of results                          | 13   | Describe the methods of handling and summarizing the data that were charted.                                                                                                                    | 9-10               |
| <b>RESULTS</b>                                |      |                                                                                                                                                                                                 |                    |
| Selection of sources of evidence              | 14   | Give numbers of sources of evidence screened, assessed for eligibility, and included in the review, with reasons for exclusions at each stage, ideally using a flow diagram.                    | 10                 |
| Characteristics of sources of evidence        | 15   | For each source of evidence, present characteristics for which data were charted and provide the citations.                                                                                     | 10-15; supp        |
| Critical appraisal within sources of evidence | 16   | If done, present data on critical appraisal of included sources of evidence (see item 12).                                                                                                      | NA                 |
| Results of individual sources of evidence     | 17   | For each included source of evidence, present the relevant data that were charted that relate to the review questions and objectives.                                                           | 10-15              |
| Synthesis of results                          | 18   | Summarize and/or present the charting results as they relate to the review questions and objectives.                                                                                            | 10-15              |
| <b>DISCUSSION</b>                             |      |                                                                                                                                                                                                 |                    |
| Summary of evidence                           | 19   | Summarize the main results (including an overview of concepts, themes, and types of evidence available), link to the review questions and objectives, and consider the relevance to key groups. | 15-18              |
| Limitations                                   | 20   | Discuss the limitations of the scoping review process.                                                                                                                                          | 17                 |
| Conclusions                                   | 21   | Provide a general interpretation of the results with respect to the review questions and objectives, as well as potential implications and/or next steps.                                       | 18                 |
| <b>FUNDING</b>                                |      |                                                                                                                                                                                                 |                    |
| Funding                                       | 22   | Describe sources of funding for the included sources of evidence, as well as sources of funding for the scoping review. Describe the role of the funders of the scoping review.                 | 22                 |

JB1 = Joanna Briggs Institute; PRISMA-ScR = Preferred Reporting Items for Systematic reviews and Meta-Analyses extension for Scoping Reviews.

\* Where *sources of evidence* (see second footnote) are compiled from, such as bibliographic databases, social media platforms, and Web sites.

† A more inclusive/heterogeneous term used to account for the different types of evidence or data sources (e.g., quantitative and/or qualitative research, expert opinion, and policy documents) that may be eligible in a scoping review as opposed to only studies. This is not to be confused with *information sources* (see first footnote).

‡ The frameworks by Arksey and O'Malley (6) and Levac and colleagues (7) and the JBI guidance (4, 5) refer to the process of data extraction in a scoping review as data charting.

§ The process of systematically examining research evidence to assess its validity, results, and relevance before using it to inform a decision. This term is used for items 12 and 19 instead of "risk of bias" (which is more applicable to systematic reviews of interventions) to include and acknowledge the various sources of evidence that may be used in a scoping review (e.g., quantitative and/or qualitative research, expert opinion, and policy document).

From: Tricco AC, Lillie E, Zarin W, O'Brien KK, Colquhoun H, Levac D, et al. PRISMA Extension for Scoping Reviews (PRISMA-ScR): Checklist and Explanation. *Ann Intern Med.* 2018;169:467–473. doi: [10.7326/M18-0850](https://doi.org/10.7326/M18-0850).

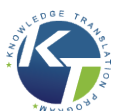

St. Michael's

Inspired Care.  
Inspiring Science.

For peer review only - <http://bmjopen.bmj.com/site/about/guidelines.xhtml>

# BMJ Open

## Evidence for Stratified Conflicts of Interest Policies in Research Contexts: A Methodological Review

|                                 |                                                                                                                                                                                                                                                                                                                                                                                                                                                                                                      |
|---------------------------------|------------------------------------------------------------------------------------------------------------------------------------------------------------------------------------------------------------------------------------------------------------------------------------------------------------------------------------------------------------------------------------------------------------------------------------------------------------------------------------------------------|
| Journal:                        | <i>BMJ Open</i>                                                                                                                                                                                                                                                                                                                                                                                                                                                                                      |
| Manuscript ID                   | bmjopen-2022-063501.R2                                                                                                                                                                                                                                                                                                                                                                                                                                                                               |
| Article Type:                   | Original research                                                                                                                                                                                                                                                                                                                                                                                                                                                                                    |
| Date Submitted by the Author:   | 25-Aug-2022                                                                                                                                                                                                                                                                                                                                                                                                                                                                                          |
| Complete List of Authors:       | Graham, Scott; University of Texas at Austin, Rhetoric & Writing<br>Karnes, Martha S.; The University of Texas at Austin, Department of English<br>Jensen, Jared T.; The University of Texas at Austin<br>Sharma, Nandini; The University of Texas at Austin<br>Barbour, Joshua B.; The University of Texas at Austin<br>Majdik, Zoltan; North Dakota State University, Communication<br>Rousseau, Justin F.; The University of Texas at Austin Dell Medical School, Population Health and Neurology |
| <b>Primary Subject Heading</b>: | Ethics                                                                                                                                                                                                                                                                                                                                                                                                                                                                                               |
| Secondary Subject Heading:      | Health policy, Research methods                                                                                                                                                                                                                                                                                                                                                                                                                                                                      |
| Keywords:                       | Health policy < HEALTH SERVICES ADMINISTRATION & MANAGEMENT, STATISTICS & RESEARCH METHODS, ETHICS (see Medical Ethics), Protocols & guidelines < HEALTH SERVICES ADMINISTRATION & MANAGEMENT, Risk management < HEALTH SERVICES ADMINISTRATION & MANAGEMENT                                                                                                                                                                                                                                         |
|                                 |                                                                                                                                                                                                                                                                                                                                                                                                                                                                                                      |

SCHOLARONE™  
Manuscripts



I, the Submitting Author has the right to grant and does grant on behalf of all authors of the Work (as defined in the below author licence), an exclusive licence and/or a non-exclusive licence for contributions from authors who are: i) UK Crown employees; ii) where BMJ has agreed a CC-BY licence shall apply, and/or iii) in accordance with the terms applicable for US Federal Government officers or employees acting as part of their official duties; on a worldwide, perpetual, irrevocable, royalty-free basis to BMJ Publishing Group Ltd ("BMJ") its licensees and where the relevant Journal is co-owned by BMJ to the co-owners of the Journal, to publish the Work in this journal and any other BMJ products and to exploit all rights, as set out in our [licence](#).

The Submitting Author accepts and understands that any supply made under these terms is made by BMJ to the Submitting Author unless you are acting as an employee on behalf of your employer or a postgraduate student of an affiliated institution which is paying any applicable article publishing charge ("APC") for Open Access articles. Where the Submitting Author wishes to make the Work available on an Open Access basis (and intends to pay the relevant APC), the terms of reuse of such Open Access shall be governed by a Creative Commons licence – details of these licences and which [Creative Commons](#) licence will apply to this Work are set out in our licence referred to above.

Other than as permitted in any relevant BMJ Author's Self Archiving Policies, I confirm this Work has not been accepted for publication elsewhere, is not being considered for publication elsewhere and does not duplicate material already published. I confirm all authors consent to publication of this Work and authorise the granting of this licence.

# Evidence for Stratified Conflicts of Interest Policies in Research Contexts: A Methodological Review

S. Scott Graham,<sup>1</sup> Martha S. Karnes,<sup>1</sup> Jared T. Jensen,<sup>1</sup> Nandini Sharma,<sup>1</sup> Joshua B. Barbour,<sup>1</sup> Zoltan P. Majdik,<sup>2</sup> and Justin F. Rousseau<sup>3</sup>

1) The University of Texas at Austin, 2) North Dakota State University, 3) The Dell Medical School at The University of Texas at Austin

Correspondence to Dr. S Scott Graham; [ssg@utexas.edu](mailto:ssg@utexas.edu).

## Abstract

**Objectives:** The purpose of this study was to conduct a methodological review of research on the effects of conflicts of interest (COI) in research contexts.

**Design:** Methodological review.

**Data Sources:** Ovid.

**Eligibility Criteria:** Studies published between 1986 and 2021 conducting quantitative assessments of relationships between industry funding or COI and four target outcomes: positive study results, methodological biases, reporting quality, and results-conclusions concordance.

**Data Extraction and Synthesis:** We assessed key facets of study design: Our primary analysis identified whether studies stratified industry funding or COI variables by magnitude (i.e., number of COI or disbursement amount), type (employment, travel fees, speaking fees) or if they assessed dichotomous variables (i.e., conflict present or absent). Secondary analyses focused on target outcomes and available effects measures.

**Results:** Of the 167 articles included in this study, a substantial majority (98.2%) evaluated the effects of industry sponsorship. None evaluated associations between funding magnitude and outcomes of interest. Seven studies (4.3%) stratified industry funding based on the mechanism of disbursement or funder relationship to product (manufacturer or competitor). A fifth of the articles (19.8%) assessed the effects of author COI on target outcomes. None evaluated COI magnitude, and 3 studies (9.1%) stratified COI by disbursement type and/or reporting practices. Participation of an industry-employed author showed the most consistent effect on favorability of results across studies.

**Conclusions:** Substantial evidence demonstrates that industry funding and COI can bias biomedical research. Evidence-based policies are essential for mitigating the risks associated with COI. Although most policies stratify guidelines for managing COI, differentiating COIs based on the type of relationship or monetary value, this review shows that the available research

1  
2  
3 has generally not been designed to assess the differential risks of COI types or magnitudes.  
4 Targeted research is necessary to establish an evidence base that can effectively inform policy to  
5 manage COI.  
6  
7  
8

## 9 Strengths and limitations of this study

- 11 • We considered a broad range of available research on the effects of industry  
12 funding and COI on biomedical research.
- 13 • This methodological review evaluates research designs assessing the relationships  
14 between industry funding or author COI and biomedical research.
- 15 • We achieved high inter-rater reliability for article screening.
- 16 • This review does not address studies of the relationships between industry  
17 funding or COI and guidelines development, regulatory decision-making, or  
18 clinical practice.  
19  
20  
21  
22  
23  
24  
25  
26  
27  
28  
29  
30  
31  
32  
33  
34  
35  
36  
37  
38  
39  
40  
41  
42  
43  
44  
45  
46  
47  
48  
49  
50  
51  
52  
53  
54  
55  
56  
57

## Background

Substantial evidence indicates that industry funding of biomedical research and author financial conflicts of interest (COI) arising from financial relationships with medically-related industry can bias research results.[1–7] Associations between industry funding or COI and positive outcomes, such as results favorable to the sponsor, are the most well documented.[2–5,7] Available evidence indicates that industry-funded trials can be up to 5.4 times more likely to return positive results than trials not sponsored by industry,[8] and trials with author COI may be as much as 8.4 times more likely to return favorable results when compared to those without author COI.[6] Additional research has demonstrated that industry funding and COI may be associated with reduced drug and device safety[6,9] and can have adverse effects on the methodological quality of clinical trials.[10–12] Recent studies also suggests that industry sponsorship may be associated with premature trial termination and non-reporting of trial results.[13,14] Calls for more evidence documenting that industry funding and COI can measurably bias biomedical research persist even though these findings have been repeatedly replicated.[15]

Recognizing the risks of bias, many organizations involved in biomedical research have adopted specific policies designed to address industry funding and COI. These include both policies designed to manage the risks associated with individual researcher COIs and guidelines addressing potential institutional COI resulting from industry gifts and research sponsorship. The need for such policies is clear, which in turn raises important questions about the form those policies should take. Differentiation among COI types and magnitudes is a common feature of the policies adopted by universities, academic medical centers (AMCs), government laboratories, and similar research institutions. COI policy guidelines published in the literature and by professional medical organizations also routinely differentiate among different COI types and



1  
2  
3 magnitudes. That is, COI policies and guidelines routinely make distinctions based on the  
4 method of remuneration (industry employment, consultancy relationships, honoraria, travel fees,  
5 etc.), the nature of the funder (e.g., industry, nonprofit, government agency), the recipient of  
6 remuneration (e.g., self, partner, family, collaborator), and the magnitude or monetary value of  
7 the disbursement. Table 1 describes explicit recommendations by the American Medical Student  
8 Association (AMSA),<sup>[16]</sup> the Association of Academic Medical Centers (AAMC),<sup>[17]</sup> the  
9 British Medical Association (BMA),<sup>[18]</sup> and Brennen et al.<sup>[19]</sup>

19 These COI policies and guidelines suggest that some types of COI should be prohibited  
20 outright, others should be subjected to specific restrictions, and some should merely require  
21 disclosure. However, different policies and guidelines do not agree on the risk presented by  
22 different types or magnitudes of COI. The recommendations typically advise a total prohibition  
23 on gifts from industry and ghostwriting, but recommendations about other COI types vary  
24 widely. For example, AMSA recommends restrictions on consulting fees, but the AAMC, BMA,  
25 and Brennen et al. do not address consultancies outside general recommendations for  
26 transparency via COI disclosure. All four guidelines disagree if industry representative access to  
27 research spaces should be restricted or prohibited outright.

40 Various policies also make distinctions about the magnitude or monetary value of COI to  
41 set disclosure thresholds. However, recommended thresholds vary widely within and between  
42 organizations. For example, since 1995, the US Department of Health and Human Services has  
43 required AMCs and other entities that receive federal research funding to adopt policies that  
44 require disclosure of COI over a certain threshold.<sup>[20]</sup> This value was lowered from \$10,000 to  
45 \$5,000 in 2011.<sup>[21]</sup> The BMA sets the declaration threshold for gifts at £500 and for equity  
46 holdings at greater than 1% of the value of the company or greater than £25,000.<sup>[18]</sup>

| COI                                                  | AMSA     | AAMC     | BMA      | Brennen et al. |
|------------------------------------------------------|----------|----------|----------|----------------|
| Attendance at unaccredited industry-sponsored events | Prohibit |          |          | Prohibit       |
| Consulting                                           | Restrict |          |          |                |
| Donations                                            |          |          | Disclose |                |
| Ghostwriting                                         | Prohibit | Prohibit |          | Prohibit       |
| Gifts                                                | Prohibit | Prohibit | Prohibit | Prohibit       |
| Grants                                               |          |          | Disclose |                |
| Industry access- device representatives              | Restrict | Restrict |          | Restrict       |
| Industry access- pharmaceutical representatives      | Prohibit | Restrict | Restrict | Prohibit       |
| Industry sponsored CME                               | Restrict | Restrict |          | Restrict       |
| Industry sponsored scholarships                      |          | Restrict |          |                |
| Meals                                                | Prohibit |          |          | Prohibit       |
| Pharmaceutical samples                               |          | Restrict |          |                |
| Research contracts                                   |          |          | Disclose |                |
| Speakers bureaus                                     | Prohibit |          |          | Prohibit       |
| Travel funds                                         |          | Restrict |          |                |
| Travel for industry sponsored meetings               |          | Prohibit |          |                |
| Travel funds for trainees                            | Prohibit |          | Prohibit | Prohibit       |
| Treatment inducements                                | Prohibit |          |          |                |

**Table 1: Illustrative Recommendations for Strata-Specific COI Policies.** This table shows AMSA,[16] AAMC,[17] BMA,[18] and Brennen et al.'s[19] recommendations for whether AMC COI policies should prohibit, restrict, or require disclosure of specific COI strata. Where entries are blank, the guidance provided no specific recommendations for that type of relationship.

The establishment of approaches to COI management that differentiate by type and magnitude indicate that common guidance *assumes* that different COI types and magnitudes carry different degrees of risk for biomedical research and require different responses. This assumption even drives much of the available research on COI policies at AMCs and similar

1  
2  
3 institutions. The AMSA scorecard, for example, is a well-established framework for COI policy  
4 evaluation.[16,22] It has been used to assess the extent to which COI policies at AMCs in the  
5 United States,[16] France,[23] and Germany [24] follow AMSA recommendations for COI policy  
6 construction and stratification.  
7  
8  
9  
10

11  
12 Despite the significant investments in developing and evaluating stratified COI policies,  
13 it is not clear that different types of COI do, in fact, carry different risks or levels of risk for  
14 biomedical research. If one were to assess the efficacy of COI policies (i.e., determine if COI  
15 policies have any effects on the quality of research), one must first assess whether policies  
16 stratified by COI types are grounded in evidence about the differential risks of different COI  
17 types. This study sought to assess the extent to which orthodox research designs for assessing the  
18 effects of COI on biomedical research have been designed to generate evidence relevant to the  
19 stratification of COI policies. Demonstrating the existence of differential risk profiles for  
20 different COI types would require, at minimum, research designs that stratify COI variables prior  
21 to analysis. They should further disaggregate industry research sponsorship generally from  
22 specific forms of author COI. Therefore, the goal of this methodological review is to evaluate the  
23 extent to which study designs in available industry funding and COI research can support COI  
24 policies or that policy recommendations should assume differential risk profiles for different  
25 types of COI and/or different monetary values. Put another way, the evidence for the need for  
26 mitigating the risks imposed by COI is strong, but the state of the research that can guide *how* to  
27 manage that risk is unclear. This study reviews methodological designs for 1) industry funding  
28 variable stratification and disaggregation, 2) COI variable stratification and disaggregation, and  
29 3) diversity of outcomes assessments.  
30  
31  
32  
33  
34  
35  
36  
37  
38  
39  
40  
41  
42  
43  
44  
45  
46  
47  
48  
49  
50  
51  
52  
53  
54  
55  
56  
57  
58  
59  
60

## Methods

Methodological reviews are designed to provide information on the prevalence of available study designs in a body of literature. They have facilitated advances in a wide variety of health and health policy contexts and can be used to identify and prioritize new pathways for research [25–28]. A methodological review is the ideal approach for this study, which requires identifying if research on the effects of industry funding and COI has been conducted in ways that could support current COI policy stratifications. Our review proceeded in three phases. First, we replicated the search strategy and article screening protocol for a previously published Cochrane systematic review of the effects of industry funding on biomedical research.[2] The prior Cochrane review evaluated the overall strength of the evidence base regarding the association of industry funding with results favorable to the sponsor, risks of bias associated with the methodological design, and the quality of reporting of the concordance between results and conclusions, but it did not document the methodological design elements in focus in this study.[2] While the meta-analysis did not expressly evaluate author COI as an isolated variable “conflicts of interest” was a key term in the search strategy, and many articles included in the Cochrane review used COI as proxy for industry funding. Our study adopted the search strategy and screening protocol of the original review, and the second phase of this review involved conducting a novel assessment of the methodological features of included articles, with particular focus on how industry funding and COI variables were operationalized in statistical analyses. Finally, we used these data to synthesize the evidence for evaluating different types of industry funding or author COI on target outcomes in biomedical research.

### Search strategy and study selection

We began by replicating the search strategy in a previously published Cochrane review. The strategy was designed to identify relevant articles indexed in the Ovid database. (See the supplementary materials for complete details.) The original review and screening protocol identified 75 studies of interest published between 1986 and 2016. We retrieved each of the original 75 studies, and in June 2021, we repeated the search strategy to collect additional relevant articles published since 2016. We also replicated the study inclusion protocol from the previous Cochrane review. Specifically, eligible studies provided a quantitative assessment of the extent to which industry funding or author COI were associated with target outcomes of interest (i.e., results favorable to industry, methodological biases, reporting quality, and results-conclusions concordance) within research on drug and device products. All collected studies evaluated one of these outcomes on a dataset of clinical trials. Clinical trials data may come from published articles, clinical trials registries, or both. Studies of the effects of industry funding and/or COI in research areas related to smoking, nutrition, physical therapy, psychotherapy, and surgery were excluded except in cases where analyses were performed on separate identifiable drug or device data. Additionally, studies that evaluated the effects of industry funding or COI on clinical practices, guidelines development, patient organizations, and regulatory policy were excluded.

Three evaluators screened titles and abstracts. After initial norming, a random sample of 255 titles and abstracts were selected by all three raters to assess reliability across screeners. A sample size of 255 was chosen to achieve 90% assurance using the intraclass correlation coefficient (ICC).[29] Overall agreement between the three raters was 94.9% with an ICC = 0.801. A secondary analysis of the random sample indicated that the abstracts for all articles selected for further screening included at least one of the following terms: “funding,” “funded,”

1  
2  
3 “COI,” “fCOI,” “conflict,” or “sponsor,” which allowed us to develop an automated screening  
4  
5 tool based on those terms. Articles selected for full-text review passed both automated and  
6  
7 manual screening. The full article text of the remaining articles was evaluated by three raters.  
8  
9

## 10 11 **Data Extraction and Synthesis**

12  
13 The current methodological review was designed to collect data on the underlying  
14  
15 analytic designs in selected articles. Specifically, the investigators collected data on which  
16  
17 independent and dependent variables had been operationalized and defined. That is, each  
18  
19 industry funding and COI independent variable was categorized as “stratified,” “unstratified,” or  
20  
21 “magnitude.” Here, “stratified,” refers to what is often called categorical or nominal variables.  
22  
23 For example, a study that stratified industry funding variables might assess if funding provided  
24  
25 by a drug manufacturer or a competing pharmaceuticals company has differential impacts on  
26  
27 target outcomes. Similarly, a study that stratified a COI variable might evaluate the relative  
28  
29 impact of different disclosed COI types such as “industry employed author,” “receipt of  
30  
31 consulting fees,” or “receipt of travel fees.” We classified independent variables as “magnitude”  
32  
33 if they assessed industry funding or COI as a continuous or ordinal variable. This might mean  
34  
35 assessing industry funding in terms of disbursed amounts (e.g., \$5000 or £20,000) or the total  
36  
37 number of COI per article. Relevant variables were identified as “unstratified” when they were  
38  
39 assessed as simply present or absent (e.g., industry funded vs. non-industry funded or reported  
40  
41 COI vs. no reported COI). We also noted if variables had been dichotomized prior to analysis.  
42  
43 This occurs when articles present stratified variable data as part of descriptive statistics, but then  
44  
45 perform statistical analyses on simplified, unstratified, dichotomous industry funding or COI  
46  
47 variables.  
48  
49  
50  
51  
52  
53  
54  
55  
56  
57  
58  
59  
60

1  
2  
3 Our analysis also assessed whether author COI was used as a proxy for industry funding.  
4  
5 This research design choice would indicate that the article in question did not fully disaggregate  
6  
7 general industry sponsorship from specific types of author COI. Each outcome variable was also  
8  
9 categorized according to the primary domain of interest, including outcome favorability to  
10  
11 sponsor, drug or device safety; quality of study design or reporting; and if results were reported  
12  
13 at all. Finally, for all articles with stratified independent variables for industry funding or author  
14  
15 COI, we identified clinical areas of interest, sample sizes used, each assessed stratum, outcomes  
16  
17 against which the stratum were assessed, significance of the results, and any reported effect  
18  
19 sizes. A complete description of the criteria is available in Supplemental Table 1.  
20  
21  
22  
23  
24

## 25 **Patients and Public Involvement**

26 No patients or public were involved in the study.  
27  
28  
29  
30

## 31 **Results**

32 Our replication of the previously published search strategy retrieved 3,884 unique records  
33  
34 for articles published in 2016 and later. Automated screening removed 2,671 articles from  
35  
36 consideration. Subsequent manual screening of titles and abstracts excluded another 926 articles.  
37  
38 The remaining 287 articles were selected for full text review, and 92 studies were ultimately  
39  
40 selected for inclusion. An additional 75 articles were included from the preexisting systematic  
41  
42 review for a dataset of 167 articles. (See Figure 1.)  
43  
44  
45  
46  
47

## 48 **Industry Funding Variable Assessment**

49 Of the 167 articles included in this study, a substantial majority (n = 164, 98.2%)  
50  
51 evaluated the effects of industry sponsorship (See Supplemental Table 2). In most cases, industry  
52  
53 funding was determined based on an article's acknowledgements or sponsorship declaration.  
54  
55  
56  
57

1  
2  
3 However, some studies collected data from clinical trials registries like clinicaltrials.gov, which  
4 index sponsorship. Notably, thirty-five studies (21.3%) assessing industry funding used author  
5 employment in industry or other author COI as part of the inclusion criteria for a variable  
6 identified as “industry funding” or “industry sponsorship.” Studies also used industry provision  
7 of drugs or devices as a criterion for industry funding. Others treated provision of supplies as its  
8 own isolated variable.  
9

10  
11  
12  
13  
14  
15  
16  
17 Among the articles that assessed industry funding in some form, none evaluated  
18 associations between funding magnitude and outcomes of interest. Ten studies (6.1%) collected  
19 stratified data on industry funding but dichotomized the variable prior to statistical analysis. Only  
20 seven studies (4.3%) stratified industry funding for analysis in any way. Evaluated strata  
21 included details about the nature of the sponsor (evaluated drug manufacturer vs. competitor  
22 company) or the nature of the sponsorship (full study sponsorship, collaborative sponsorship  
23 with other funders, or provision of medications). Three of the seven studies included assessed  
24 differences in favorable outcomes based on funder relationship to the product evaluated (e.g.,  
25 manufacturer vs. competitor company).[30–32] Only one study found significant results:[30] This  
26 review of 542 psychiatry studies found that a greater percentage of studies sponsored by the drug  
27 manufacturer have positive outcomes than those not sponsored by a pharmaceutical company  
28 (78% vs 48%), and that research sponsored by a competitor had the lowest rate of favorable  
29 findings (28%). Pairwise comparisons between manufacturer-funded or competitor-funded and  
30 non-industry-funded studies were significantly different, but the study reported no indicators of  
31 effect size. Three studies evaluated strata related to the mode of industry involvement.[33–35]  
32  
33  
34  
35  
36  
37  
38  
39  
40  
41  
42  
43  
44  
45  
46  
47  
48  
49  
50  
51  
52  
53  
54  
55  
56  
57  
58  
59  
60



1  
2  
3 involvement. One study found significant results, and reported that “other” industry involvement  
4 associates with favorable outcomes for industry.[35] See Table 2 for further details. In sum, a  
5  
6 substantial proportion of the research that might provide insight into COI policy design assesses  
7  
8 only industry sponsorship generally. Nearly a quarter of the assessed studies conflate industry  
9  
10 funding and COI variables making it impossible for results to shed light on potentially useful  
11  
12 policy differences. And, finally, studies of industry funding that do stratify variables primarily  
13  
14 provide insight on different sponsorship modalities and not on issues related to author COI.  
15  
16  
17  
18  
19

### 20 21 **COI Variable Assessment**

22 Of the 167 articles evaluated, only 33 (19.8%) assessed COI as a discrete variable.  
23  
24 Attention to COI began considerably later in the dataset, not appearing until 2005. Most studies  
25  
26 that evaluated author COI relied on the data in the published disclosure statement. A handful of  
27  
28 studies used the authors institutional affiliation as an indicator of industry employment, and a  
29  
30 few studies also compared disclosure statements to data available in the Open Payments  
31  
32 Database. Of the articles that evaluated author COI, none assessed COI magnitude, and only 3  
33  
34 studies (9.1%) stratified COI for analysis. Four studies (12.1%) collected stratified COI data but  
35  
36 dichotomized it prior to analysis. The few studies that assessed COI strata independently tended  
37  
38 to evaluate disclosure practices as opposed to COI types.[36–38] These articles report on  
39  
40 evaluations of the relationship between favorable outcomes or methodological quality and COI  
41  
42 disclosure, lack of funding disclosure, incomplete disclosure, lack of disclosure requirements by  
43  
44 journal, or affirmative statements of no author COI. Disclosure of COI and “full” disclosure of  
45  
46 COI were most strongly associated with results favorable to industry.[37,38] Here “full”  
47  
48 disclosure meant that all payments reported to the Open Payments Database were reflected in  
49  
50 published disclosure statements. Assessments of these different disclosure practices returned  
51  
52  
53  
54  
55  
56  
57  
58  
59  
60

non-significant results or smaller effect sizes. Two studies evaluated the relationship between participation of industry-employed authors and results favorable to industry.[33,34] An evaluation of 215 psychiatric studies published between 1998 and 2003 found that participation of industry authors was significantly associated with favorable outcomes.[33] Similarly, an assessment of 91 asthma product studies found that favorable outcomes were more likely for studies with industry-employed authors.[34] (See Table 2.)

| Article        | Area                | Samp. | Outcome              | Strata                                   | Sig.   | Effect Measure | Effect           |
|----------------|---------------------|-------|----------------------|------------------------------------------|--------|----------------|------------------|
| Ahmer 2005     | psychiatry          | 306   | Outcome Favorability | Industry Provided Medications            | 0.053  | -              | -                |
|                |                     |       |                      | Author is Industry Employee              | 0.01*  | OR             | 8.33 (1.64-50.0) |
| Bartels 2012   | spine research      | 51    | Outcome Favorability | Disclosed COI                            | <0.05* | OR             | 16.5 (4.7-58.1)  |
|                |                     |       |                      | Statement of No COI                      | -      | -              | -                |
|                |                     |       |                      | Disclosure Not Required by Journal       | -      | -              | -                |
| Bond 2012      | asthma              | 91    | Outcome Favorability | Industry Sponsorship                     | 0.546  | -              | -                |
|                |                     |       |                      | Industry Publication Venue               | 0.191  | -              | -                |
|                |                     |       |                      | Other Industry Involvement               | NR     | -              | -                |
|                |                     |       |                      | Author is Industry Employee              | 0.003* | RR             | 1.42 (1.10-1.82) |
| Jinapriya 2011 | latanoprost         | 44    | Outcome Favorability | Sponsorship by Parent Company            | 0.53   | -              | -                |
|                |                     |       |                      | Sponsorship by Competing Company         | 0.53   | -              | -                |
| Kelly 2006     | psychiatry          | 542   | Outcome Favorability | Sponsorship by Manufacturer              | 0.001* | -              | -                |
|                |                     |       |                      | Sponsorship by Competing Company         | 0.001* | -              | -                |
| Rattinger 2009 | Thiazolidine diones | 61    | Outcome Favorability | Sponsorship by Manufacturer              | 0.7778 | -              | -                |
|                |                     |       |                      | Sponsorship by Competing Company         | 0.037* | OR             | 0(0,0.886)       |
|                |                     |       |                      | No Funding Disclosure                    | 0.4153 | -              | -                |
|                |                     |       |                      | Corresponding Author COI                 | 0.3939 | -              | -                |
|                |                     |       |                      | Corresponding Author is Sponsor Employee | 0.5714 | -              | -                |
|                |                     |       |                      | Corresponding Author No Disclosure       | 0.4388 | -              | -                |

|             |                |     |                                            |                                          |        |                |                      |
|-------------|----------------|-----|--------------------------------------------|------------------------------------------|--------|----------------|----------------------|
|             |                |     |                                            | Corresponding Author<br>COI with sponsor | 0.049* | OR             | 4.125(1.048;19.525)  |
|             |                |     |                                            | First Author COI                         | 0.1667 | -              | -                    |
|             |                |     |                                            | First Author is<br>Sponsor Employee      | -      | -              | -                    |
|             |                |     |                                            | First Author No<br>Disclosure            | -      | -              | -                    |
|             |                |     |                                            | First Author COI with<br>sponsor         | 0.4588 | -              | -                    |
| Vlad 2007   | osteoarthritis | 15  | Outcome<br>Favorability                    | Industry Sponsorship                     | 0.05   | -              | -                    |
|             |                |     |                                            | Other Industry<br>Involvement            | 0.02*  | random effects | 0.55<br>(0.29-0.81)  |
|             |                |     |                                            | Author COI                               | 0.04*  | random effects | 0.55<br>(0.27-0.84)  |
| Cherla 2018 | multiple       | 590 | Outcome<br>Favorability                    | Full Disclosure                          | 0.001* | OR             | 8.65<br>(2.46-30.44) |
|             |                |     |                                            | Incomplete Industry<br>Disclosure        | 0.003* | OR             | 3.61<br>(1.53-8.51)  |
|             |                |     |                                            | Incomplete Self-<br>Disclosure (Partial) | 0.004* | OR             | 4.14<br>(1.58-10.82) |
|             |                |     |                                            | Incomplete Self-<br>Disclosure (None)    | 0.002* | OR             | 0.14<br>(0.37-1.15)  |
| Saa 2018    | probiotics     | 66  | Outcome<br>Favorability                    | Industry sponsorship                     | 0.491  | -              | -                    |
|             |                |     |                                            | Non-Disclosure of<br>Sponsorship         | 0.491  | -              | -                    |
|             |                |     | Methodologica<br>l or Reporting<br>Quality | Industry Sponsorship                     | 0.491  | -              | -                    |
|             |                |     |                                            | Non-Disclosure of<br>Sponsorship         | 0.491  | -              | -                    |

**Table 2: Industry funding and COI Strata Assessed and Associated Results.** This table describes the clinical area, methodological design (sample, outcome, variable strata), and results of analysis presented in articles that evaluated identifiable industry funding and COI strata.

### Target Outcomes Evaluation

Most studies in the dataset (n = 108, 64.7%) evaluated the relationship between industry funding or COI and outcomes favorability for sponsors. Sixty-six (39.5%) evaluated methodological or reporting quality. Nineteen (11.4%) assessed reporting of results, and 15 (9.0%) evaluated drug or device safety. Attention to specific outcomes appears to have changed over time. Industry favorability of study outcomes had long been the dominant focus of research on industry funding and COI. Quality, safety, and reporting grew increasingly prevalent (Figure

1  
2  
3 2). Importantly, however, studies that stratified industry funding or COI variables were less  
4  
5 diverse in their target outcomes. Of the 10 studies that stratified relevant variables, outcomes  
6  
7 favorability to industry was assessed in all cases. One study also assessed the relationship  
8  
9 between disclosure practices and methodological or reporting quality.[36]  
10  
11  
12  
13

## 14 Discussion

15 For COI policies to make effective distinctions based on nature of relationships or  
16  
17 amount of remuneration, these distinctions must be grounded in research that assesses  
18  
19 differential risk profiles of COI types and magnitudes. However, a substantial majority of  
20  
21 research assessing the effects of industry funding and author COI on biomedical research does  
22  
23 not stratify relevant variables. Remarkably, *zero* studies included in this review conducted any  
24  
25 assessments of the magnitude of either industry funding or author COI. Additionally, the  
26  
27 available literature's ability to support evidence-based stratifications in COI policies is further  
28  
29 compromised by regular conflation of industry sponsorship and author COI variables as well as  
30  
31 the practice of dichotomizing variables prior to conducting statistical analyses. The few studies  
32  
33 that did stratify COI variables tended to focus on disclosure practices rather than COI types, and  
34  
35 most studies assess only if COI types associated with results favorable to industry and not if they  
36  
37 associated with other target outcomes of interest. These findings point to limitations in current  
38  
39 disclosure practices that allow authors a great deal of latitude in reporting and describing COI.  
40  
41 The variability of disclosure statements limits the extent to which research on COI can evaluate  
42  
43 differential effects. Nevertheless, the results of this methodological review indicate that the  
44  
45 available research on industry funding and COI has generally not been designed to guide COI  
46  
47 policy stratifications or the establishment of disclosure thresholds.  
48  
49  
50  
51  
52  
53  
54  
55  
56  
57  
58  
59  
60

1  
2  
3 Appropriate and evidence-based COI policies are essential for safeguarding the integrity  
4 of the biomedical research enterprise. Therefore, it is critical that research can meaningfully  
5 inform continued policy refinement. Clearly, guiding the design of COI policy requires  
6 additional research designed to assess the differential risks associated with various COI types  
7 and magnitudes.  
8  
9

10  
11  
12 Furthermore, research in this area could also be better supported by the development of  
13 standardized taxonomies of industry funding and/or author COI. Since the literature variously  
14 defines “industry funding” as sponsorship, employment, provision of medications, or any author  
15 COI, it is quite difficult to compare and aggregate findings across studies. Likewise, competing  
16 understandings of author COI based in different disclosure practices and type definitions also  
17 indicate the strong need for robust taxonomies that can guide future research. Empirically  
18 validated taxonomies could also support more consistent disclosure practices, which would aid  
19 future research evaluating the differential effects of COIs by type or magnitude.  
20  
21  
22  
23  
24  
25  
26  
27  
28  
29  
30  
31  
32

33 These taxonomies combined with evidence about the magnitude of COIs would allow for  
34 computation and aggregation of COIs essential for supporting research that could effectively  
35 guide COI policy refinement. New research on the risks of COI would also benefit from  
36 continued diversification of outcomes assessment. Recent years have seen a steady expansion of  
37 outcomes of interest (e.g., outcomes favorability giving way to more assessments of quality,  
38 safety, and reporting practices), but favorability of results is still the overwhelmingly dominant  
39 target outcome.  
40  
41  
42  
43  
44  
45  
46  
47  
48

49 Finally, the results of this review also suggest that researchers and policymakers would  
50 benefit from considering COI risks beyond those manageable at the individual researcher level. It  
51 is notable that common COI policies and guidelines tend to be strict with respect to relationships  
52  
53  
54  
55  
56  
57

1  
2  
3 of modest economic benefit to individuals (e.g., meals and travel) whereas relationships with  
4 well-documented risks but considerable economic benefit to institutions (e.g., industry grants and  
5 collaborations) are largely left out of COI policy recommendations. Furthermore, the strongest  
6 evidence relates to author employment in industry, although specific instructions about  
7 disclosing employment have been removed from the latest ICMJE disclosure guidance. Given  
8 that collaborations with industry are a common form of institutional COI, and one not addressed  
9 by individualized COI policies, these findings support recent calls for greater attention to  
10 institutional COI at institutions that conduct biomedical research.[39–42] Research conducted  
11 primarily at universities, AMCs, and other research institutions may be more prone to bias when  
12 it is supported by industry funding or industry collaboration. COI policies that focus on  
13 individual researchers alone will not mitigate against these risks.

14  
15  
16  
17  
18  
19  
20  
21  
22  
23  
24  
25  
26  
27  
28  
29  
30  
31  
32  
33  
34  
35  
36  
37  
38  
39  
40  
41  
42  
43  
44  
45  
46  
47  
48  
49  
50  
51  
52  
53  
54  
55  
56  
57  
58  
59  
60

This study has several limitations that should inform the reading of the findings. Our review evaluates the methodological design and approaches to variable stratification for studies of the relationships between industry funding or author COI and four specified outcomes of interest in biomedical research. Although we are aware of studies that evaluate COI magnitude, for example, they were not returned by our search strategy either because they treat COI magnitude in the aggregate[43] or because they assess non-target outcomes such as associations with commercial publishing practices.[44] Additionally, AMC guidelines are designed to respond to COI risks in multiple domains including research, clinical practice, and medical education. We assume that COI strata related to industry-funded continuing medical education or pharmaceutical representative access to AMCs are designed primarily to address risks of bias associated with medical education and clinical practice. Additional research not covered by this

1  
2  
3 review is available that evaluates the relationships of industry funding and COI with prescription  
4  
5 practices, guidelines development, and policy decision-making.  
6

7  
8         These limitations notwithstanding, the results suggest that policies designed to address  
9  
10 COI risks associated with clinical practice may not effectively safeguard the integrity of  
11  
12 biomedical research across institutional contexts because of the gap between policy and available  
13  
14 COI research. Furthermore, it is possible that a one-size-fits-all COI policy may not be  
15  
16 appropriate. Additional efforts should be made to ensure that COI policies are responsive to risks  
17  
18 associated with bias in biomedical research. For example, AMCs should potentially consider  
19  
20 differential policies based on institutional roles. Future research might, therefore, investigate the  
21  
22 utility of separate COI policies for clinical, educational, and research staff as well as staff  
23  
24 holding multiple roles. In such cases, it might be appropriate to require staff to adhere to the  
25  
26 most restrictive policy. COI policies should be developed based on an understanding of the  
27  
28 differential effects of distinct strata and magnitudes of COI on outcomes across the multiple  
29  
30 domains.  
31  
32  
33  
34  
35  
36

## 37 Conclusion

38         Current COI policies in research contexts devote considerable attention to distinguishing  
39  
40 between different types and magnitudes of COI. Although substantial evidence exists that  
41  
42 industry funding and COI have adverse effects on biomedical research, the current evidence  
43  
44 cannot guide policy stratification by type or magnitude. Given the broad adoption of policies that  
45  
46 distinguish between COI types and set disclosure thresholds, the shortcomings identified here are  
47  
48 weaknesses of current research that must be addressed. Importantly, however, we are not calling  
49  
50 for a suspension of COI policies while this research is conducted. Inaccurate claims to  
51  
52 insufficient evidence have long served to limit the scope of COI policies and to delay  
53  
54  
55  
56  
57

1  
2  
3 adoption.[15] A precautionary approach would involve adopting more restrictive unstratified  
4  
5 policies until such time that certain COI types are demonstrated to be of lower risk. Furthermore,  
6  
7 our findings also suggests that these problematic claims may have adversely affected COI  
8  
9 research itself. Unspecified calls for “more research” might partially explain why, despite the  
10  
11 clear findings of the 2017 meta-study [2], so many studies continue to assess if COI has an effect  
12  
13 rather than which COI have what effects and why. Instead of suggesting the need for more COI  
14  
15 research broadly, the current methodological review points towards targeted research needs  
16  
17 about COI types and magnitudes. If stratified policies at research institutions are to mitigate the  
18  
19 risks of COI, they must be based on comparative assessments of differential risks.  
20  
21  
22  
23  
24  
25  
26  
27  
28  
29  
30

31 **Data Availability Statement:** All data relevant to the study are included in the article or  
32 uploaded as supplementary information.  
33

34 **Ethics Approval:** This study did not require ethics approval as it did not involve human  
35 subjects.  
36

37  
38 **Funding:** This work was funded by the National Institute of General Medical Sciences of the  
39 National Institutes of Health under Award Number R01GM141476. The content is solely the  
40 responsibility of the authors and does not necessarily represent the official views of the National  
41 Institutes of Health.  
42

43 **Contributors:** SSG designed the study, coordinated the study, and is the guarantor. SSG, JBB,  
44 and JFR executed the search strategy and screened abstracts. SSG, MSK, JJ, and NS collected  
45 the data. SSG, JBB, JFR, and ZPM analyzed the data. SSG, MSK, and NS drafted the  
46 manuscript. SSG, JBB, JFR, and ZPM revised the manuscript. Guarantor: SSG.  
47  
48

49 **Competing interests:** SSG has received grant support from the National Institute of General  
50 Medical Sciences of the National Institutes of Health and the National Endowment for the  
51 Humanities; compute time from the National Science Foundation’s Extreme Science and  
52 Engineering Discovery Environment; and support for consulting from the Texas Health and  
53 Human Services Commission. JBB has received grant support from the National Institute of  
54 General Medical Sciences of the National Institutes of Health, The National Science Foundation,  
55  
56  
57



1  
2  
3 and Blue Cross Blue Shield/Health Care Service Corporation. JFR has received grant support  
4 from the National Institutes of Health (National Institute of General Medical Sciences, National  
5 Institute of Allergy and Infectious Diseases, the National Institute of Mental Health), the Health  
6 Care Cost Institute, the Texas Child Mental Health Care Consortium, and the Michael and Susan  
7 Dell Foundation. He has received support through research service agreements with Austin  
8 Public Health and the Integrated Care Collaboration. He has always received funds from  
9 National Center for Advancing Translational Sciences via the NIH Division of Loan Repayment.  
10 ZPM has received grant support from the National Institute of General Medical Sciences of the  
11 National Institutes of Health, the National Science Foundation, the Summer Institute in  
12 Computational Social Science, and consulting fees from the University of Texas at Austin. MSK,  
13 JJJ, and NS have no conflicts of interest to disclose.  
14  
15  
16  
17  
18  
19  
20

## 21 References

- 22 1 Institute of Medicine. *Conflict of Interest in Medical Research, Education, and Practice*.  
23 Washington, DC: : The National Academies Press 2009. doi:10.17226/12598
- 24 2 Lundh A, Lexchin J, Mintzes B, *et al*. Industry sponsorship and research outcome. *Cochrane*  
25 *Database Syst Rev* Published Online First: 2017. doi:10.1002/14651858.MR000033.pub3
- 26 3 Waqas A, Baig AA, Khalid MA, *et al*. Conflicts of interest and outcomes of clinical trials of  
27 antidepressants: An 18-year retrospective study. *J Psychiatr Res* 2019;**116**:83–7.  
28 doi:10.1016/j.jpsychires.2019.05.029
- 29 4 Ahn R, Woodbridge A, Abraham A, *et al*. Financial ties of principal investigators and  
30 randomized controlled trial outcomes: cross sectional study. *BMJ* 2017;**356**:i6770.  
31 doi:10.1136/bmj.i6770
- 32 5 Flacco ME, Manzoli L, Boccia S, *et al*. Head-to-head randomized trials are mostly industry  
33 sponsored and almost always favor the industry sponsor. *J Clin Epidemiol* 2015;**68**:811–20.  
34 doi:10.1016/j.jclinepi.2014.12.016
- 35 6 Perlis RH, Perlis CS, Wu Y, *et al*. Industry sponsorship and financial conflict of interest in  
36 the reporting of clinical trials in psychiatry. *Am J Psychiatry* 2005;**162**:1957–60.  
37 doi:10.1176/appi.ajp.162.10.1957
- 38 7 Djulbegovic B, Lacevic M, Cantor A, *et al*. The uncertainty principle and industry-sponsored  
39 research. *The Lancet* 2000;**356**:635–8. doi:10.1016/S0140-6736(00)02605-2
- 40 8 Als-Nielsen B, Chen W, Gluud C, *et al*. Association of Funding and Conclusions in  
41 Randomized Drug Trials: A Reflection of Treatment Effect or Adverse Events? *JAMA*  
42 2003;**290**:921–8. doi:10.1001/jama.290.7.921
- 43 9 Gyawali B, Tessema FA, Jung EH, *et al*. Assessing the Justification, Funding, Success, and  
44 Survival Outcomes of Randomized Noninferiority Trials of Cancer Drugs: A Systematic  
45  
46  
47  
48  
49  
50  
51  
52  
53  
54  
55  
56  
57

- 1  
2  
3 Review and Pooled Analysis. *JAMA Netw Open* 2019;**2**:e199570.  
4 doi:10.1001/jamanetworkopen.2019.9570  
5
- 6  
7 10 Fraguas D, Díaz-Caneja CM, Pina-Camacho L, *et al*. Predictors of Placebo Response in  
8 Pharmacological Clinical Trials of Negative Symptoms in Schizophrenia: A Meta-regression  
9 Analysis. *Schizophr Bull* 2019;**45**:57–68. doi:10.1093/schbul/sbx192  
10
- 11 11 Gao Y, Ge L, Ma X, *et al*. Improvement needed in the network geometry and inconsistency  
12 of Cochrane network meta-analyses: a cross-sectional survey. *J Clin Epidemiol*  
13 2019;**113**:214–27. doi:10.1016/j.jclinepi.2019.05.022  
14
- 15 12 Kapelios CJ, Naci H, Vardas PE, *et al*. Study design, result posting and publication of late-  
16 stage cardiovascular trials. *Eur Heart J Qual Care Clin Outcomes* 2020;:qcaa080.  
17 doi:10.1093/ehjqcco/qcaa080  
18
- 19 13 Roddick AJ, Chan FTS, Stefaniak JD, *et al*. Discontinuation and non-publication of clinical  
20 trials in cardiovascular medicine. *Int J Cardiol* 2017;**244**:309–15.  
21 doi:10.1016/j.ijcard.2017.06.020  
22
- 23 14 Stefaniak JD, Lam TCH, Sim NE, *et al*. Discontinuation and non-publication of  
24 neurodegenerative disease trials: a cross-sectional analysis. *Eur J Neurol* 2017;**24**:1071–6.  
25 doi:10.1111/ene.13336  
26
- 27 15 Goldberg D. On Physician-Industry Relationships and Unreasonable Standards of Proof for  
28 Harm: A Population-Level Bioethics Approach. *Kennedy Inst Ethics J* 2016;**26**:173–94.  
29 doi:10.1353/ken.2016.0022  
30
- 31 16 Carlat DJ, Fagrelus T, Ramachandran R, *et al*. The updated AMSA scorecard of conflict-of-  
32 interest policies: a survey of U.S. medical schools. *BMC Med Educ* 2016;**16**:202.  
33 doi:10.1186/s12909-016-0725-y  
34
- 35 17 AAMC. Industry Funding of Medical Education Report of an AAMC Task Force.  
36 2008.<https://www.aamc.org/system/files/c/2/482220-industryfundingofmedicaleducation.pdf>  
37 (accessed 27 Jan 2022).  
38
- 39 18 BMA. Transparency and doctors with competing interests – guidance from the BMA.  
40 2017.[https://www.bma.org.uk/media/1853/bma-transparency-and-doctors-with-competing-](https://www.bma.org.uk/media/1853/bma-transparency-and-doctors-with-competing-interests-apr-2017.pdf)  
41 [interests-apr-2017.pdf](https://www.bma.org.uk/media/1853/bma-transparency-and-doctors-with-competing-interests-apr-2017.pdf)  
42
- 43 19 Brennan TA, Rothman DJ, Blank L, *et al*. Health industry practices that create conflicts of  
44 interest: a policy proposal for academic medical centers. *JAMA* 2006;**295**:429–33.  
45 doi:10.1001/jama.295.4.429  
46
- 47 20 Lo B, Wolf LE, Berkeley A. Conflict-of-Interest Policies for Investigators in Clinical Trials.  
48 *N Engl J Med* 2000;**343**:1616–20. doi:10.1056/NEJM200011303432206  
49  
50  
51  
52  
53  
54  
55  
56  
57

- 1  
2  
3 21 HHS Tightens Financial Conflict of Interest Rules for Researchers. Natl. Inst. Health NIH.  
4 2015. <https://www.nih.gov/news-events/news-releases/hhs-tightens-financial-conflict->  
5 [interest-rules-researchers](https://www.nih.gov/news-events/news-releases/hhs-tightens-financial-conflict-) (accessed 27 Jan 2022).  
6  
7  
8 22 Fabbri A, Rasmussen Hone K, Hróbjartsson A, *et al.* Conflict of Interest Policies at Medical  
9 Schools and Teaching Hospitals: A Systematic Review of Cross-sectional Studies. *Int J*  
10 *Health Policy Manag* 2021;**0**. doi:10.34172/ijhpm.2021.12  
11  
12 23 Scheffer P, Guy-Coichard C, Outh-Gauer D, *et al.* Conflict of Interest Policies at French  
13 Medical Schools: Starting from the Bottom. *PLOS ONE* 2017;**12**:e0168258.  
14 doi:10.1371/journal.pone.0168258  
15  
16 24 Grabitz P, Friedmann Z, Gepp S, *et al.* Quantity and quality of conflict of interest policies at  
17 German medical schools: a cross-sectional study and survey. *BMJ Open* 2020;**10**:e039782.  
18 doi:10.1136/bmjopen-2020-039782  
19  
20  
21 25 Oakley A, Fullerton D, Holland J, *et al.* Sexual health education interventions for young  
22 people: a methodological review. *BMJ* 1995;**310**:158–62. doi:10.1136/bmj.310.6973.158  
23  
24 26 Mellor K, Eddy S, Peckham N, *et al.* Progression from external pilot to definitive  
25 randomised controlled trial: a methodological review of progression criteria reporting. *BMJ*  
26 *Open* 2021;**11**:e048178. doi:10.1136/bmjopen-2020-048178  
27  
28  
29 27 Windt J, Ardern CL, Gabbett TJ, *et al.* Getting the most out of intensive longitudinal data: a  
30 methodological review of workload–injury studies. *BMJ Open* 2018;**8**:e022626.  
31 doi:10.1136/bmjopen-2018-022626  
32  
33 28 Arksey H, O'Malley L. Scoping studies: towards a methodological framework. *Int J Soc Res*  
34 *Methodol* 2005;**8**:19–32. doi:10.1080/1364557032000119616  
35  
36 29 Zou GY. Sample size formulas for estimating intraclass correlation coefficients with  
37 precision and assurance. *Stat Med* 2012;**31**:3972–81. doi:10.1002/sim.5466  
38  
39  
40 30 Kelly RE, Cohen LJ, Semple RJ, *et al.* Relationship between drug company funding and  
41 outcomes of clinical psychiatric research. *Psychol Med* 2006;**36**:1647–56.  
42 doi:10.1017/S0033291706008567  
43  
44 31 Jinapriya D, Anraku A, Alasbali T, *et al.* Evaluation of investigator bias in industry-funded  
45 clinical trials of latanoprost. *Can J Ophthalmol J Can Ophtalmol* 2011;**46**:531–6.  
46 doi:10.1016/j.jcjo.2011.09.015  
47  
48  
49 32 Rattinger G, Bero L. Factors Associated with Results and Conclusions of Trials of  
50 Thiazolidinediones. *PLOS ONE* 2009;**4**:e5826. doi:10.1371/journal.pone.0005826  
51  
52 33 Ahmer S, Arya P, Anderson D, *et al.* Conflict of interest in psychiatry. *Psychiatr Bull*  
53 2005;**29**:302–4. doi:10.1192/pb.29.8.302  
54  
55  
56  
57  
58  
59  
60

- 1  
2  
3 34 Bond K, Spooner C, Tjosvold L, *et al.* The nature and influence of pharmaceutical industry  
4 involvement in asthma trials. *Can Respir J J Can Thorac Soc* 2012;**19**:267–71.  
5  
6  
7 35 Vlad SC, LaValley MP, McAlindon TE, *et al.* Glucosamine for pain in osteoarthritis: why do  
8 trial results differ? *Arthritis Rheum* 2007;**56**:2267–77. doi:10.1002/art.22728  
9  
10 36 Saa C, Bunout D, Hirsch S. Industry funding effect on positive results of probiotic use in the  
11 management of acute diarrhea: a systematized review. *Eur J Gastroenterol Hepatol*  
12 2019;**31**:289–302. doi:10.1097/MEG.0000000000001322  
13  
14 37 Bartels RHMA, Delye H, Boogaarts J. Financial disclosures of authors involved in spine  
15 research: an underestimated source of bias. *Eur Spine J Off Publ Eur Spine Soc Eur Spinal*  
16 *Deform Soc Eur Sect Cerv Spine Res Soc* 2012;**21**:1229–33. doi:10.1007/s00586-011-2086-x  
17  
18 38 Cherla DV, Viso CP, Holihan JL, *et al.* The Effect of Financial Conflict of Interest,  
19 Disclosure Status, and Relevance on Medical Research from the United States. *J Gen Intern*  
20 *Med* 2019;**34**:429–34. doi:10.1007/s11606-018-4784-0  
21  
22 39 Slaughter S, Feldman MP, Thomas SL. U.S. Research Universities' Institutional Conflict of  
23 Interest Policies. *J Empir Res Hum Res Ethics* 2009;**4**:3–20. doi:10.1525/jer.2009.4.3.3  
24  
25 40 Rochon PA, Sekeres M, Lexchin J, *et al.* Institutional financial conflicts of interest policies  
26 at Canadian academic health science centres: a national survey. *Open Med* 2010;**4**:e134–8.  
27  
28 41 Resnik DB, Ariansen JL, Jamal J, *et al.* Institutional Conflict of Interest Policies at U.S.  
29 Academic Research Institutions. *Acad Med J Assoc Am Med Coll* 2016;**91**:242–6.  
30 doi:10.1097/ACM.0000000000000980  
31  
32 42 Nichols-Casebolt A, Macrina FL. Current Perspectives Regarding Institutional Conflict of  
33 Interest. *Sci Eng Ethics* 2019;**25**:1671–7. doi:10.1007/s11948-015-9703-8  
34  
35 43 Graham SS, Majdik ZP, Barbour JB, *et al.* Associations between aggregate NLP-extracted  
36 conflicts of interest and adverse events by drug product. *Stud Health Technol Inform*  
37  
38 44 Graham SS, Majdik ZP, Clark D, *et al.* Relationships among commercial practices and  
39 author conflicts of interest in biomedical publishing. *PLOS ONE* 2020;**15**:e0236166.  
40 doi:10.1371/journal.pone.0236166  
41  
42  
43  
44  
45  
46  
47  
48

## Figure Legends

49  
50  
51 **Figure 1.** PRISMA Flow Diagram  
52

53 **Figure 2:** Variable Types By Year Number (1986-2021). Figure includes number of studies per  
54 year by dependent variable (DV) type (A), number of studies by independent variable (IV) type  
55  
56  
57

1  
2  
3  
4  
5  
6  
7  
8  
9  
10  
11  
12  
13  
14  
15  
16  
17  
18  
19  
20  
21  
22  
23  
24  
25  
26  
27  
28  
29  
30  
31  
32  
33  
34  
35  
36  
37  
38  
39  
40  
41  
42  
43  
44  
45  
46  
47  
48  
49  
50  
51  
52  
53  
54  
55  
56  
57  
58  
59  
60

for studies assessing industry funding (B) and number of studies by IV type for studies evaluating COI (C).

For peer review only

PRISMA 2020 flow diagram for updated systematic reviews which included searches of databases and registers only

1  
2  
3  
4  
5  
6  
7  
8  
9  
10  
11  
12  
13  
14  
15  
16  
17  
18  
19  
20  
21  
22  
23  
24  
25  
26  
27  
28  
29  
30  
31  
32  
33  
34  
35  
36  
37  
38  
39  
40  
41  
42  
43  
44  
45  
46  
47  
48  
49  
50  
51  
52  
53  
54  
55  
56  
57  
58  
59  
60





1  
2  
3  
4  
5  
6  
7  
8  
9  
10  
11  
12  
13  
14  
15  
16  
17  
18  
19  
20  
21  
22  
23  
24  
25  
26  
27  
28  
29  
30  
31  
32  
33  
34  
35  
36  
37  
38  
39  
40  
41  
42  
43  
44  
45  
46  
47

## Search strategy

### MEDLINE via OvidSP (2015 – June 2021)

1. Drug Industry/
2. ((drug\$ or pharmaceutical or device\$ or for-profit or commercial\$) adj2 (industr\$ or company or companies or manufacturer\$ or organi#ation\$ or agency or agencies or source\$ or party or parties)).ti,ab.
3. private industr\$.ti,ab.
4. (industr\$ or nonindustr\$ or non-industr\$).ti,ab.
5. or/1-4
6. "Conflict of Interest"/
7. Financial Support/
8. Research Support as Topic/
9. (influenc\$ or funded or funding or sponsor\$ or support\$ or financ\$ or involvement).ti,ab.
10. competing interest\$.ti,ab.
11. or/6-10
12. and/5,11
13. Publication Bias/
14. "bias (epidemiology)"/
15. bias\$.ti,ab.
16. or/13-15
17. and/12,16
18. Treatment Outcome/
19. "Outcome Assessment (Health Care)"/
20. (outcome\$ or finding\$).ti,ab.
21. or/18-20
22. (favo?r\$ or positive or significan\$ or beneficial or benefit\$ or effective or effectual or efficacious).ti,ab.
23. (insignifican\$ or nonsignifican\$ or negative or adverse or ineffectiv\$ or ineffectual or unfavo?rabl\$ or detrimental).ti,ab.



1  
2  
3 24. or/22-23  
4

5 25. and/21,24  
6

7 26. and/12,25  
8

9 27. ((favo?r\$ or positive or significan\$ or insignifican\$ or nonsignifican\$ or negative or  
10 unfavo?rabl\$ or detrimental) adj2 (event\$ or result\$ or outcome\$ or conclusion\$)).ti,ab.  
11

12 28. and/12,27  
13

14 29. or/17,26,28  
15  
16  
17  
18  
19  
20  
21  
22  
23  
24  
25  
26  
27  
28  
29  
30  
31  
32  
33  
34  
35  
36  
37  
38  
39  
40  
41  
42  
43  
44  
45  
46  
47  
48  
49  
50  
51  
52  
53  
54  
55  
56  
57  
58  
59  
60

For peer review only

# Supplementary Online Materials

| <b>Industry Funding Independent Variable (IV) Type.</b> |                                                                                                                                                                                                                                                                                                                                                                                                                                                                                                                                           |
|---------------------------------------------------------|-------------------------------------------------------------------------------------------------------------------------------------------------------------------------------------------------------------------------------------------------------------------------------------------------------------------------------------------------------------------------------------------------------------------------------------------------------------------------------------------------------------------------------------------|
| Stratified                                              | Study provides a quantitative assessment of the relationship between different types of industry funding and one or more outcomes of interest. Industry funding may be analyzed as a categorical variable or as a series of dichotomous variables representing a range of industry funding categories. Funder stratifications may include level of involvement (primary, secondary), relationship to drug or device under study (manufacturer, competitor), or mode of sponsorship (study sponsor, medication provider, author employer). |
| Unstratified                                            | Industry funding is analyzed as a dichotomous variable or as one category in a categorical variable, e.g. funder types might include industry, government, nonprofit.                                                                                                                                                                                                                                                                                                                                                                     |
| Magnitude                                               | Industry funding is a continuous variable representing either the total number of industry funders per study or total dollar value of contributions.                                                                                                                                                                                                                                                                                                                                                                                      |
| <b>Author COI IV Type</b>                               |                                                                                                                                                                                                                                                                                                                                                                                                                                                                                                                                           |
| Stratified                                              | Study provides a quantitative assessment of the relationship between different types of COI and one or more outcomes of interest. Industry funding may be analyzed as a categorical variable or as a series of dichotomous variables representing a range of COI categories. COI stratifications may include type of disbursement (employment, speaker fees, etc) and affiliation (trial sponsor vs. non-sponsor funder).                                                                                                                 |
| Unstratified                                            | COI is analyzed as a dichotomous variable or as one category in a categorical variable, e.g., Industry funding, Author COI, Government Funding.                                                                                                                                                                                                                                                                                                                                                                                           |
| Magnitude                                               | COI is a continuous variable representing either the total number of relationships or the total dollar value of contributions.                                                                                                                                                                                                                                                                                                                                                                                                            |
| <b>COI as Proxy for Industry Funding Study</b>          |                                                                                                                                                                                                                                                                                                                                                                                                                                                                                                                                           |
| Yes                                                     | Disclosed author COI are used as inclusion criteria for industry funding.                                                                                                                                                                                                                                                                                                                                                                                                                                                                 |
| No                                                      | Disclosed COI are not used as inclusion criteria for industry funding or industry funding is not measured.                                                                                                                                                                                                                                                                                                                                                                                                                                |
| <b>IV Dichotomization</b>                               |                                                                                                                                                                                                                                                                                                                                                                                                                                                                                                                                           |
| NA                                                      | The IV used in the statistical analysis was stratified or an assessment of magnitude.                                                                                                                                                                                                                                                                                                                                                                                                                                                     |
| Yes                                                     | The categorical schema was converted to dichotomous variables that were used for analysis.                                                                                                                                                                                                                                                                                                                                                                                                                                                |
| No                                                      | The IV was consistently treated as dichotomous throughout the article.                                                                                                                                                                                                                                                                                                                                                                                                                                                                    |
| <b>Dependent Variable Type (DV Type)</b>                |                                                                                                                                                                                                                                                                                                                                                                                                                                                                                                                                           |
| Outcome                                                 | The analysis evaluates if chosen IVs are associated with results indicating the success of the intervention (drug, device, etc) or are otherwise favorable to trial sponsors. Includes drug efficacy, response rate, positive interpretation of findings, etc.                                                                                                                                                                                                                                                                            |
| Safety                                                  | The analysis evaluates if chosen IVs associate with results related to drug safety.                                                                                                                                                                                                                                                                                                                                                                                                                                                       |
| Quality                                                 | The analysis evaluates if chosen IVs are associated with results related to methodological or reporting quality. Includes issues of statistical power, risk of bias, presence of hype or spin.                                                                                                                                                                                                                                                                                                                                            |
| Reporting                                               | The analysis evaluates whether or not trial results were reported at all. May include reporting to ClinicalTrials.gov or publication of findings.                                                                                                                                                                                                                                                                                                                                                                                         |

**Supplemental Table 1. Methodological Design Feature Schema for Analyzed Studies.** Definition and details for industry funding IV type, author COI IV type, COI as proxy for industry funding, dichotomization, and DV type analyses.

1  
2  
3  
4  
5  
6  
7  
8  
9  
10  
11  
12  
13  
14  
15  
16  
17  
18  
19  
20  
21  
22  
23  
24  
25  
26  
27  
28  
29  
30  
31  
32  
33  
34  
35  
36  
37  
38  
39  
40  
41  
42  
43  
44  
45  
46  
47  
48  
49  
50  
51  
52  
53  
54  
55  
56  
57  
58  
59  
60

| <i>Article</i>                          | <i>Year</i> | <i>IF IV Type</i> | <i>COI IV Type</i> | <i>DV Type</i>        | <i>COI Proxy</i> | <i>IF Dichotomize</i> | <i>COI Dichotomize</i> |
|-----------------------------------------|-------------|-------------------|--------------------|-----------------------|------------------|-----------------------|------------------------|
| <i>Abildgaard et al. (1)</i>            | 2019        | Unstratified      | None               | Outcome               | yes              | yes                   | NA                     |
| <i>Addeo et al. (2)</i>                 | 2019        | Unstratified      | None               | Outcome,<br>Safety    | no               | no                    | NA                     |
| <i>Abmer et al. (3)</i>                 | 2005        | Stratified        | Unstratified       | Outcome               | no               | NA                    | no                     |
| <i>Abn et al. (4)</i>                   | 2016        | Unstratified      | Unstratified       | Outcome               | no               | no                    | yes                    |
| <i>Alasbali et al. (5)</i>              | 2009        | Unstratified      | None               | Outcome,<br>Quality   | no               | no                    | NA                     |
| <i>Als-Nielsen et al. (6)</i>           | 2003        | Unstratified      | None               | Outcome               | yes              | NA                    | NA                     |
| <i>Arni et al. (7)</i>                  | 2004        | Unstratified      | None               | Quality               | no               | no                    | NA                     |
| <i>Azad et al. (8)</i>                  | 2019        | Unstratified      | None               | Quality               | no               | NA                    | NA                     |
| <i>Azharuddin et al. (9)</i>            | 2020        | Unstratified      | None               | Quality               | no               | no                    | NA                     |
| <i>Barden et al. (10)</i>               | 2005        | Unstratified      | None               | Outcome               | yes              | no                    | NA                     |
| <i>Bariani et al. (11)</i>              | 2013        | Unstratified      | Unstratified       | Outcome               | no               | yes                   | yes                    |
| <i>Bartels et al. (12)</i>              | 2012        | Unstratified      | Stratified         | Outcome               | yes              | no                    | NA                     |
| <i>Bero et al. (13)</i>                 | 2007        | Unstratified      | Unstratified       | Outcome               | no               | NA                    | no                     |
| <i>Bhandari et al. (14)</i>             | 2004        | Unstratified      | None               | Outcome               | no               | yes                   | no                     |
| <i>Bighelli et al. (15)</i>             | 2020        | Unstratified      | Unstratified       | Quality               | no               | no                    | NA                     |
| <i>Bond et al. (16)</i>                 | 2012        | Stratified        | Unstratified       | Outcome               | yes              | NA                    | no                     |
| <i>Booth et al. (17)</i>                | 2008        | Unstratified      | None               | Outcome,<br>Quality   | no               | NA                    | NA                     |
| <i>Bourgeois et al. (18)</i>            | 2010        | Unstratified      | None               | Outcome,<br>Quality   | no               | NA                    | NA                     |
| <i>Brown et al. (19)</i>                | 2006        | Unstratified      | None               | Outcome,<br>Quality   | no               | no                    | NA                     |
| <i>Buchkowsky and<br/>Jewesson (20)</i> | 2004        | Unstratified      | Unstratified       | Outcome               | no               | NA                    | no                     |
| <i>Budhiraja et al. (21)</i>            | 2021        | Unstratified      | None               | Outcome               | no               | NA                    | NA                     |
| <i>Bugano et al et al.<br/>(22)</i>     | 2017        | Unstratified      | None               | Outcome,<br>Quality   | no               | no                    | NA                     |
| <i>Catillon (23)</i>                    | 2019        | Unstratified      | Unstratified       | Quality               | no               | no                    | NA                     |
| <i>Chang et al. (24)</i>                | 2021        | Unstratified      | None               | Quality               | no               | NA                    | NA                     |
| <i>Chard et al. (25)</i>                | 2000        | Unstratified      | None               | Outcome,<br>Quality   | no               | NA                    | NA                     |
| <i>Chen et al. (26)</i>                 | 2016        | Unstratified      | None               | Reporting             | no               | NA                    | NA                     |
| <i>Cherla et al. (27)</i>               | 2018        | None              | Stratified         | Outcome               | no               | NA                    | NA                     |
| <i>Cho and Bera (28)</i>                | 1996        | Unstratified      | None               | Outcome,<br>Quality   | yes              | no                    | NA                     |
| <i>Clark et al. (29)</i>                | 2002        | Unstratified      | None               | Outcome               | no               | no                    | NA                     |
| <i>Clifford et al. (30)</i>             | 2002        | Unstratified      | None               | Outcome,<br>Quality   | no               | NA                    | NA                     |
| <i>Corona et al. (31)</i>               | 2014a       | Unstratified      | None               | Quality,<br>Safety    | yes              | no                    | NA                     |
| <i>Corona et al. (32)</i>               | 2014b       | Unstratified      | None               | Outcome,<br>Quality   | yes              | no                    | NA                     |
| <i>Cristea et al. (33)</i>              | 2017        | None              | Unstratified       | Outcome               | no               | NA                    | no                     |
| <i>Crocetti et al. (34)</i>             | 2010        | Unstratified      | None               | Quality               | no               | NA                    | NA                     |
| <i>Davidović et al. (35)</i>            | 2021        | Unstratified      | None               | Outcome,<br>Reporting | no               | no                    | NA                     |
| <i>Davidson (36)</i>                    | 1986        | Unstratified      | None               | Outcome               | yes              | no                    | NA                     |

|    |                                           |       |              |              |                    |     |     |     |
|----|-------------------------------------------|-------|--------------|--------------|--------------------|-----|-----|-----|
| 1  |                                           |       |              |              |                    |     |     |     |
| 2  |                                           |       |              |              |                    |     |     |     |
| 3  | <i>Davis et al. (37)</i>                  | 2008  | Unstratified | None         | Outcome            | yes | no  | NA  |
| 4  | <i>de Souza Gutierrez et al. (38)</i>     | 2020  | Unstratified | None         | Quality            | no  | no  | NA  |
| 5  | <i>DeFrance et al. (39)</i>               | 2021  | None         | Unstratified | Outcome            | no  | NA  | no  |
| 6  | <i>DeGeorge et al. (40)</i>               | 2015  | Unstratified | Unstratified | Outcome            | no  | NA  | no  |
| 7  | <i>Del Paggio et al. (41)</i>             | 2017  | Unstratified | None         | Outcome, Quality   | no  | no  | NA  |
| 8  |                                           |       |              |              |                    |     |     |     |
| 9  |                                           |       |              |              |                    |     |     |     |
| 10 | <i>Falk Delgado and Falk Delgado (42)</i> | 2017a | Unstratified | None         | Outcome            | no  | NA  | NA  |
| 11 | <i>Falk Delgado and Falk Delgado (43)</i> | 2017b | Unstratified | Unstratified | Reporting          | no  | NA  | no  |
| 12 | <i>DePasse et al. (44)</i>                | 2018  | Unstratified | None         | Reporting          | no  | NA  | NA  |
| 13 | <i>DeVito et al. (45)</i>                 | 2020  | Unstratified | None         | Reporting          | no  | NA  | NA  |
| 14 | <i>Djulfbegovic et al. (46)</i>           | 2013  | Unstratified | None         | Outcome            | no  | no  | NA  |
| 15 | <i>Djulfbegovic et al. (47)</i>           | 2000  | Unstratified | None         | Quality            | yes | no  | NA  |
| 16 | <i>Eitter et al. (48)</i>                 | 2007  | Unstratified | None         | Outcome            | yes | no  | NA  |
| 17 | <i>Finucane and Boulton (49)</i>          | 2004  | Unstratified | None         | Outcome            | yes | no  | NA  |
| 18 | <i>Flacco et al. (50)</i>                 | 2015  | Unstratified | Unstratified | Outcome, Quality   | yes | yes | no  |
| 19 | <i>Fraguas et al. (51)</i>                | 2018  | Unstratified | None         | Quality            | no  | no  | NA  |
| 20 | <i>Freemantle et al. (52)</i>             | 2000  | Unstratified | None         | Outcome            | no  | no  | NA  |
| 21 | <i>Fung et al. (53)</i>                   | 2017  | Unstratified | None         | Quality, Reporting | no  | no  | NA  |
| 22 | <i>Gabler et al. (54)</i>                 | 2016  | Unstratified | None         | Reporting, Quality | no  | no  | NA  |
| 23 | <i>Gan et al. (55)</i>                    | 2012  | Unstratified | None         | Quality            | no  | no  | NA  |
| 24 | <i>Gao et al. (56)</i>                    | 2019  | Unstratified | None         | Quality            | no  | NA  | NA  |
| 25 | <i>Gartlehner et al. (57)</i>             | 2010  | Unstratified | None         | Outcome, Quality   | yes | no  | NA  |
| 26 | <i>Gaudino et al. (58)</i>                | 2020  | Unstratified | Unstratified | Outcome, Quality   | yes | no  | yes |
| 27 | <i>Gonzalez et al. (59)</i>               | 2019  | Unstratified | None         | Quality            | no  | NA  | NA  |
| 28 | <i>Grey et al. (60)</i>                   | 2018  | Unstratified | None         | Outcome            | no  | no  | NA  |
| 29 | <i>Gyawali et al. (61)</i>                | 2019  | Unstratified | None         | Safety             | no  | NA  | NA  |
| 30 | <i>Hajibandeh et al. (62)</i>             | 2017  | Unstratified | Unstratified | Outcome            | no  | no  | no  |
| 31 | <i>Halpern et al. (63)</i>                | 2004  | Unstratified | None         | Quality            | no  | NA  | NA  |
| 32 | <i>Hanna et al. (64)</i>                  | 2016  | Unstratified | None         | Outcome            | no  | NA  | NA  |
| 33 | <i>Hashemipour et al. (65)</i>            | 2019  | Unstratified | Unstratified | Outcome            | no  | no  | no  |
| 34 | <i>Hengartner et al. (66)</i>             | 2021  | Unstratified | None         | Safety             | yes | no  | NA  |
| 35 | <i>Heres et al. (67)</i>                  | 2006  | Unstratified | None         | Outcome            | no  | no  | NA  |
| 36 | <i>Janiand et al. (68)</i>                | 2018  | Unstratified | None         | Outcome            | no  | yes | NA  |
| 37 | <i>Jefferson et al. (69)</i>              | 2009  | Unstratified | None         | Quality            | no  | no  | NA  |
| 38 | <i>Jellison et al. (70)</i>               | 2020  | Unstratified | None         | Quality            | no  | yes | NA  |
| 39 | <i>Jimapriya et al. (71)</i>              | 2011  | Stratified   | None         | Outcome            | no  | NA  | NA  |
| 40 | <i>Johnson et al. (72)</i>                | 2020  | Unstratified | None         | Reporting          | no  | NA  | NA  |
| 41 |                                           |       |              |              |                    |     |     |     |
| 42 |                                           |       |              |              |                    |     |     |     |
| 43 |                                           |       |              |              |                    |     |     |     |
| 44 |                                           |       |              |              |                    |     |     |     |
| 45 |                                           |       |              |              |                    |     |     |     |
| 46 |                                           |       |              |              |                    |     |     |     |
| 47 |                                           |       |              |              |                    |     |     |     |
| 48 |                                           |       |              |              |                    |     |     |     |
| 49 |                                           |       |              |              |                    |     |     |     |
| 50 |                                           |       |              |              |                    |     |     |     |
| 51 |                                           |       |              |              |                    |     |     |     |
| 52 |                                           |       |              |              |                    |     |     |     |
| 53 |                                           |       |              |              |                    |     |     |     |
| 54 |                                           |       |              |              |                    |     |     |     |
| 55 |                                           |       |              |              |                    |     |     |     |
| 56 |                                           |       |              |              |                    |     |     |     |
| 57 |                                           |       |              |              |                    |     |     |     |
| 58 |                                           |       |              |              |                    |     |     |     |
| 59 |                                           |       |              |              |                    |     |     |     |
| 60 |                                           |       |              |              |                    |     |     |     |

|    |                                            |      |              |              |                       |     |    |    |
|----|--------------------------------------------|------|--------------|--------------|-----------------------|-----|----|----|
| 1  |                                            |      |              |              |                       |     |    |    |
| 2  |                                            |      |              |              |                       |     |    |    |
| 3  | <i>Jones et al. (73)</i>                   | 2010 | Unstratified | None         | Quality               | no  | NA | NA |
| 4  | <i>Kakkar et al. (74)</i>                  | 2019 | Unstratified | None         | Quality               | no  | no | NA |
| 5  | <i>Kapelios et al. (75)</i>                | 2020 | Unstratified | None         | Outcome,<br>Quality   | no  | no | NA |
| 6  | <i>Kelly et al. (76)</i>                   | 2006 | Stratified   | None         | Outcome               | yes | NA | NA |
| 7  | <i>Kemmeren et al. (77)</i>                | 2001 | Unstratified | None         | Safety                | no  | no | NA |
| 8  | <i>Khan et al. (78)</i>                    | 2012 | Unstratified | None         | Outcome,<br>Quality   | no  | NA | NA |
| 9  | <i>Killin et al. (79)</i>                  | 2014 | Unstratified | None         | Outcome               | yes | no | NA |
| 10 | <i>Kjaergard and Als-<br/>Nielsen (80)</i> | 2002 | Unstratified | None         | Outcome               | no  | NA | NA |
| 11 | <i>Lee et al. (81)</i>                     | 2012 | Unstratified | None         | COI,<br>Outcome       | no  | no | NA |
| 12 | <i>Lee et al. (82)</i>                     | 2020 | Unstratified | None         | Reporting             | no  | no | NA |
| 13 | <i>Leite et al. (83)</i>                   | 2017 | Unstratified | Unstratified | Outcome               | no  | no | no |
| 14 | <i>Leucht et al. (84)</i>                  | 2017 | Unstratified | None         | Outcome,<br>Quality   | no  | no | NA |
| 15 | <i>Leucht et al. (85)</i>                  | 2019 | Unstratified | None         | Outcome               | no  | no | NA |
| 16 | <i>Linker et al. (86)</i>                  | 2017 | Unstratified | None         | Outcome,<br>Quality   | no  | NA | NA |
| 17 | <i>Liss (87)</i>                           | 2006 | Unstratified | None         | Outcome               | yes | no | NA |
| 18 | <i>Liu et al. (88)</i>                     | 2018 | Unstratified | None         | Outcome               | no  | NA | NA |
| 19 | <i>Lubowitz et al. (89)</i>                | 2007 | Unstratified | None         | Outcome               | no  | no | NA |
| 20 | <i>Lynch et al. (90)</i>                   | 2007 | Unstratified | None         | Outcome,<br>Quality   | yes | NA | NA |
| 21 | <i>Ma et al. (91)</i>                      | 2014 | Unstratified | None         | Outcome,<br>Safety    | no  | no | NA |
| 22 | <i>Magnani et al. (92)</i>                 | 2021 | Unstratified | None         | Reporting,<br>Outcome | no  | NA | NA |
| 23 | <i>Maillet et al. (93)</i>                 | 2015 | Unstratified | None         | Outcome               | no  | no | NA |
| 24 | <i>Malek et al. (94)</i>                   | 2017 | Unstratified | None         | Outcome               | no  | no | NA |
| 25 | <i>Mian et al. (95)</i>                    | 2020 | Unstratified | None         | Quality               | no  | NA | NA |
| 26 | <i>Mitchell and<br/>Patterson (96)</i>     | 2020 | Unstratified | None         | Quality               | no  | NA | NA |
| 27 | <i>Momeni et al. (97)</i>                  | 2009 | Unstratified | None         | Outcome               | no  | NA | NA |
| 28 | <i>Moncrieff (98)</i>                      | 2003 | Unstratified | None         | Outcome               | no  | no | NA |
| 29 | <i>Montgomery et al.<br/>(99)</i>          | 2004 | Unstratified | Unstratified | Outcome,<br>Quality   | no  | no | no |
| 30 | <i>Moraes et al. (100)</i>                 | 2017 | Unstratified | Unstratified | Outcome               | no  | NA | no |
| 31 | <i>Mossman et al. (101)</i>                | 2021 | Unstratified | None         | Outcome               | no  | no | NA |
| 32 | <i>Naci et al. (102)</i>                   | 2014 | Unstratified | None         | Outcome,<br>Quality   | no  | no | NA |
| 33 | <i>Ng et al. (103)</i>                     | 2016 | Unstratified | None         | Quality               | no  | no | NA |
| 34 | <i>Nieto et al. (104)</i>                  | 2007 | Unstratified | None         | Safety                | no  | no | NA |
| 35 | <i>Nithianandan et al.<br/>(105)</i>       | 2020 | Unstratified | Unstratified | Outcome               | no  | no | no |
| 36 | <i>Odentayo et al. (106)</i>               | 2017 | Unstratified | None         | Outcome               | no  | no | NA |
| 37 | <i>Paggio et al. (107)</i>                 | 2021 | Unstratified | None         | Quality               | no  | no | NA |
| 38 | <i>Pasalic et al. (108)</i>                | 2020 | Unstratified | None         | Quality               | no  | no | NA |
| 39 | <i>Pengel et al. (109)</i>                 | 2009 | Unstratified | None         | Quality               | yes | NA | NA |
| 40 |                                            |      |              |              |                       |     |    |    |
| 41 |                                            |      |              |              |                       |     |    |    |
| 42 |                                            |      |              |              |                       |     |    |    |
| 43 |                                            |      |              |              |                       |     |    |    |
| 44 |                                            |      |              |              |                       |     |    |    |
| 45 |                                            |      |              |              |                       |     |    |    |
| 46 |                                            |      |              |              |                       |     |    |    |
| 47 |                                            |      |              |              |                       |     |    |    |
| 48 |                                            |      |              |              |                       |     |    |    |
| 49 |                                            |      |              |              |                       |     |    |    |
| 50 |                                            |      |              |              |                       |     |    |    |
| 51 |                                            |      |              |              |                       |     |    |    |
| 52 |                                            |      |              |              |                       |     |    |    |
| 53 |                                            |      |              |              |                       |     |    |    |
| 54 |                                            |      |              |              |                       |     |    |    |
| 55 |                                            |      |              |              |                       |     |    |    |
| 56 |                                            |      |              |              |                       |     |    |    |
| 57 |                                            |      |              |              |                       |     |    |    |
| 58 |                                            |      |              |              |                       |     |    |    |
| 59 |                                            |      |              |              |                       |     |    |    |
| 60 |                                            |      |              |              |                       |     |    |    |

|    |                               |       |              |              |                      |     |     |    |
|----|-------------------------------|-------|--------------|--------------|----------------------|-----|-----|----|
| 1  |                               |       |              |              |                      |     |     |    |
| 2  |                               |       |              |              |                      |     |     |    |
| 3  | <i>Pepper et al. (110)</i>    | 2019  | Unstratified | None         | Safety               | no  | no  | NA |
| 4  | <i>Peppercorn et al.</i>      | 2007  | Unstratified | Unstratified | Outcome              | yes | no  | no |
| 5  | <i>(111)</i>                  |       |              |              |                      |     |     |    |
| 6  | <i>Perlis et al. (112)</i>    | 2005a | Unstratified | Unstratified | Outcome, Quality     | yes | no  | no |
| 7  |                               |       |              |              |                      |     |     |    |
| 8  | <i>Perlis et al. (113)</i>    | 2005b | Unstratified | Unstratified | Outcome              | yes | no  | no |
| 9  | <i>Popelut et al. (114)</i>   | 2010  | Unstratified | None         | Outcome              | no  | NA  | no |
| 10 | <i>Pouwels et al. (115)</i>   | 2017  | Unstratified | None         | Outcome, Quality     | no  | no  | NA |
| 11 |                               |       |              |              |                      |     |     |    |
| 12 | <i>Prakash et al. (116)</i>   | 2018  | Unstratified | None         | Quality              | no  | NA  | NA |
| 13 | <i>Price-Haywood et al.</i>   | 2019  | Unstratified | None         | Safety               | no  | NA  | NA |
| 14 | <i>(117)</i>                  |       |              |              |                      |     |     |    |
| 15 | <i>Printz et al. (118)</i>    | 2013  | Unstratified | None         | Outcome              | yes | no  | NA |
| 16 | <i>Probst et al. (119)</i>    | 2016  | Unstratified | None         | Outcome              | no  | no  | NA |
| 17 | <i>Punja et al. (120)</i>     | 2016  | Unstratified | None         | Outcome, Safety      | no  | no  | NA |
| 18 |                               |       |              |              |                      |     |     |    |
| 19 | <i>Putman et al. (121)</i>    | 2021  | Unstratified | None         | Quality              | yes | no  | NA |
| 20 | <i>Raman et al. (122)</i>     | 2018  | Unstratified | Unstratified | Outcome              | no  | NA  | no |
| 21 | <i>Rasmussen et al.</i>       | 2009  | Unstratified | None         | Outcome              | yes | yes | NA |
| 22 | <i>(123)</i>                  |       |              |              |                      |     |     |    |
| 23 | <i>Rattinger and Bero</i>     | 2009  | Stratified   | Stratified   | Outcome              | yes | NA  | NA |
| 24 | <i>(124)</i>                  |       |              |              |                      |     |     |    |
| 25 | <i>Reda et al. (125)</i>      | 2016  | Unstratified | None         | Outcome, Quality     | no  | yes | NA |
| 26 |                               |       |              |              |                      |     |     |    |
| 27 | <i>Rees et al. (126)</i>      | 2019  | Unstratified | None         | Reporting            | no  | NA  | NA |
| 28 | <i>Ridker and Torres</i>      | 2006  | Unstratified | None         | Outcome              | no  | NA  | NA |
| 29 | <i>(127)</i>                  |       |              |              |                      |     |     |    |
| 30 | <i>Rios et al. (128)</i>      | 2008  | Unstratified | None         | Quality              | no  | NA  | NA |
| 31 | <i>Rocbon et al. (129)</i>    | 1994  | Unstratified | None         | Outcome, Quality     | yes | no  | NA |
| 32 |                               |       |              |              |                      |     |     |    |
| 33 | <i>Roddick et al. (130)</i>   | 2017  | Unstratified | None         | Outcome              | no  | NA  | NA |
| 34 | <i>Roper et al. (131)</i>     | 2014  | Unstratified | None         | Limitations, Outcome | no  | NA  | NA |
| 35 |                               |       |              |              |                      |     |     |    |
| 36 | <i>Rosner et al. (132)</i>    | 2010  | Unstratified | None         | Outcome, Quality     | no  | no  | NA |
| 37 | <i>Rosner et al. (133)</i>    | 2011  | Unstratified | None         | Outcome              | no  | NA  | no |
| 38 | <i>Saa et al. (134)</i>       | 2018  | Stratified   | None         | Outcome, Quality     | yes | NA  | NA |
| 39 | <i>Saleh et al. (135)</i>     | 2020  | Unstratified | None         | Outcome              | no  | no  | NA |
| 40 | <i>Sendyk et al. (136)</i>    | 2019  | Unstratified | None         | Quality, Reporting   | no  | no  | NA |
| 41 |                               |       |              |              |                      |     |     |    |
| 42 | <i>Shepard et al. (137)</i>   | 2021  | Unstratified | None         | Quality              | no  | NA  | NA |
| 43 | <i>Silva et al. (138)</i>     | 2017  | Unstratified | None         | Safety, Quality      | no  | no  | NA |
| 44 |                               |       |              |              |                      |     |     |    |
| 45 | <i>Simonetti et al. (139)</i> | 2019  | Unstratified | None         | Safety               | no  | no  | NA |
| 46 | <i>Sinyor et al. (140)</i>    | 2012  | Unstratified | None         | Outcome, Safety      | yes | no  | NA |
| 47 |                               |       |              |              |                      |     |     |    |
| 48 | <i>Son et al. (141)</i>       | 2016  | Unstratified | None         | Outcome              | no  | no  | NA |
| 49 | <i>Spanenberg et al.</i>      | 2011  | Unstratified | None         | Outcome, Quality     | no  | no  | NA |
| 50 | <i>(142)</i>                  |       |              |              |                      |     |     |    |
| 51 | <i>Sriganesh et al. (143)</i> | 2017  | Unstratified | None         | Quality              | no  | no  | NA |
| 52 | <i>Stefaniak et al. (144)</i> | 2017  | Unstratified | None         | Reporting, Quality   | no  | NA  | NA |
| 53 |                               |       |              |              |                      |     |     |    |
| 54 | <i>Steffens et al. (145)</i>  | 2021  | Unstratified | None         | Quality              | yes | no  | NA |
| 55 |                               |       |              |              |                      |     |     |    |
| 56 |                               |       |              |              |                      |     |     |    |
| 57 |                               |       |              |              |                      |     |     |    |
| 58 |                               |       |              |              |                      |     |     |    |
| 59 |                               |       |              |              |                      |     |     |    |
| 60 |                               |       |              |              |                      |     |     |    |

1  
2  
3  
4  
5  
6  
7  
8  
9  
10  
11  
12  
13  
14  
15  
16  
17  
18  
19  
20  
21  
22  
23  
24  
25  
26  
27  
28  
29  
30  
31  
32  
33  
34  
35  
36  
37  
38  
39  
40  
41  
42  
43  
44  
45  
46  
47  
48  
49  
50  
51  
52  
53  
54  
55  
56  
57  
58  
59  
60

|                                    |      |              |              |                  |     |     |     |
|------------------------------------|------|--------------|--------------|------------------|-----|-----|-----|
| <i>Sung et al. (146)</i>           | 2013 | Unstratified | None         | Outcome          | yes | no  | NA  |
| <i>Tiabau et al. (147)</i>         | 2018 | Unstratified | None         | Outcome          | no  | NA  | NA  |
| <i>Trinquart et al. (148)</i>      | 2018 | Unstratified | None         | Reporting        | no  | no  | NA  |
| <i>Tulikangas et al. (149)</i>     | 2006 | Unstratified | None         | Outcome          | no  | no  | NA  |
| <i>Tungaraza and Poole (150)</i>   | 2007 | Unstratified | Unstratified | Outcome          | no  | no  | no  |
| <i>Urrutia et al. (151)</i>        | 2016 | Unstratified | None         | Reporting        | no  | no  | NA  |
| <i>van den Bogert et al. (152)</i> | 2017 | Unstratified | None         | Quality          | no  | yes | NA  |
| <i>van Heteren et al. (153)</i>    | 2019 | Unstratified | None         | Reporting        | no  | NA  | NA  |
| <i>Van Lent et al. (154)</i>       | 2014 | Unstratified | None         | Outcome          | yes | NA  | NA  |
| <i>Venincasa et al. (155)</i>      | 2019 | Unstratified | Unstratified | Outcome          | no  | no  | no  |
| <i>Vlad et al. (156)</i>           | 2007 | Stratified   | Unstratified | Outcome, Quality | no  | NA  | no  |
| <i>Walkup et al. (157)</i>         | 2017 | Unstratified | None         | Outcome          | no  | no  | NA  |
| <i>Walter et al. (158)</i>         | 2020 | Unstratified | None         | Reporting        | no  | no  | NA  |
| <i>Waqas et al. (159)</i>          | 2019 | Unstratified | Unstratified | Outcome          | no  | no  | no  |
| <i>Welsb et al. (160)</i>          | 2018 | Unstratified | Unstratified | Reporting        | no  | NA  | no  |
| <i>Wise et al. (161)</i>           | 2021 | Unstratified | Unstratified | Outcome          | no  | yes | yes |
| <i>Wong et al. (162)</i>           | 2019 | Unstratified | None         | Outcome          | no  | no  | NA  |
| <i>Wortzel et al. (163)</i>        | 2020 | Unstratified | None         | Quality          | no  | NA  | NA  |
| <i>Xu et al. (164)</i>             | 2013 | Unstratified | None         | Safety           | no  | no  | NA  |
| <i>Yilmaz et al. (165)</i>         | 2018 | Unstratified | None         | Reporting        | no  | no  | NA  |
| <i>Youssef et al. (166)</i>        | 2016 | Unstratified | None         | Outcome          | no  | no  | NA  |
| <i>Zhang et al. (167)</i>          | 2013 | Unstratified | None         | Outcome, Safety  | no  | no  | NA  |

**Supplemental Table 2. Methodological Design Analysis for All Collected Articles.** Includes industry funding IV type, author COI IV type, DV type(s), COI as proxy, and dichotomization data.

### Supplemental References

1. Abildgaard JT, Chung AS, Tokish JM, Hattrup SJ. Clinical efficacy of liposomal bupivacaine: a systematic review of prospective, randomized controlled trials in orthopaedic surgery. *JBJS Rev.* 2019 Jul;7(7):e8.
2. Addeo A, Weiss GJ, Gyawali B. Association of industry and academic sponsorship with negative phase 3 oncology trials and reported outcomes on participant survival: A pooled analysis. *JAMA Netw Open.* 2019 May 3;2(5):e193684.
3. Ahmer S, Arya P, Anderson D, Faruqi R. Conflict of interest in psychiatry. *Psychiatric Bulletin.* 2005 Aug;29(8):302–4.
4. Ahn R, Woodbridge A, Abraham A, Saba S, Korenstein D, Madden E, et al. Financial ties of principal investigators and randomized controlled trial outcomes: cross sectional study. *BMJ.* 2017 Jan 17;356:i6770.
5. Alasbali T, Smith M, Geffen N, Trope GE, Flanagan JG, Jin Y, et al. Discrepancy between results and abstract conclusions in industry- vs nonindustry-funded studies comparing topical prostaglandins. *Am J Ophthalmol.* 2009 Jan;147(1):33-38.e2.

6. Als-Nielsen B, Chen W, Gluud C, Kjaergard LL. Association of funding and conclusions in randomized drug trials: a reflection of treatment effect or adverse events? *JAMA*. 2003 Aug 20;290(7):921–8.
7. Avni T, Shiber-Ofer S, Leibovici L, Paul M. Assessment of bias in outcomes reported in trials on pneumonia: a systematic review. *Eur J Clin Microbiol Infect Dis*. 2014 Jun;33(6):969–74.
8. Azad TD, Feng AY, Mehta S, Bak AB, Johnson E, Mittal V, et al. Randomized controlled trials in functional neurosurgery—association of device approval status and trial quality. *Neuromodulation: Technology at the Neural Interface*. 2020;23(4):496–501.
9. Azharuddin M, Adil M, Khan RA, Ghosh P, Kapur P, Sharma M. Systematic evidence of health economic evaluation of drugs for postmenopausal osteoporosis: A quality appraisal. *Osteoporosis and Sarcopenia*. 2020 Jun 1;6(2):39–52.
10. Barden J, Derry S, McQuay HJ, Moore AR. Bias from industry trial funding? A framework, a suggested approach, and a negative result. *Pain*. 2006 Apr;121(3):207–18.
11. Bariani GM, de Celis Ferrari ACR, Hoff PM, Krzyzanowska MK, Riechelmann RP. Self-reported conflicts of interest of authors, trial sponsorship, and the interpretation of editorials and related phase III trials in oncology. *J Clin Oncol*. 2013 Jun 20;31(18):2289–95.
12. Bartels RHMA, Delye H, Boogaarts J. Financial disclosures of authors involved in spine research: an underestimated source of bias. *Eur Spine J*. 2012 Jul;21(7):1229–33.
13. Bero L, Oostvogel F, Bacchetti P, Lee K. Factors associated with findings of published trials of drug-drug comparisons: why some statins appear more efficacious than others. *PLoS Med*. 2007 Jun;4(6):e184.
14. Bhandari M, Busse JW, Jackowski D, Montori VM, Schünemann H, Sprague S, et al. Association between industry funding and statistically significant pro-industry findings in medical and surgical randomized trials. *CMAJ*. 2004 Feb 17;170(4):477–80.
15. Bighelli I, Leucht C, Huhn M, Reitmeir C, Schwermann F, Wallis S, et al. Are randomized controlled trials on pharmacotherapy and psychotherapy for positive symptoms of schizophrenia comparable? a systematic review of patient and study characteristics. *Schizophr Bull*. 2020 Apr 10;46(3):496–504.
16. Bond K, Spooner C, Tjosvold L, Lemièrre C, Rowe BH. The nature and influence of pharmaceutical industry involvement in asthma trials. *Can Respir J*. 2012;19(4):267–71.
17. Booth CM, Cescon DW, Wang L, Tannock IF, Krzyzanowska MK. Evolution of the randomized controlled trial in oncology over three decades. *J Clin Oncol*. 2008 Nov 20;26(33):5458–64.
18. Bourgeois FT, Murthy S, Mandl KD. Outcome reporting among drug trials registered in ClinicalTrials.gov. *Ann Intern Med*. 2010 Aug 3;153(3):158–66.
19. Brown A, Kraft D, Schmitz SM, Sharpless V, Martin C, Shah R, et al. Association of industry sponsorship to published outcomes in gastrointestinal clinical research. *Clin Gastroenterol Hepatol*. 2006 Dec;4(12):1445–51.
20. Buchkowsky SS, Jewesson PJ. Industry sponsorship and authorship of clinical trials over 20 years. *Ann Pharmacother*. 2004 Apr;38(4):579–85.
21. Budhiraja P, Kaplan B, Kalot M, Alayli AE, Dimassi A, Chakkeria HA, et al. Current state of evidence on kidney transplantation: how fragile are the results? *Transplantation*. 2022 Feb 1;106(2):248–56.
22. Bugano DDG, Hess K, Jardim DLF, Zer A, Meric-Bernstam F, Siu LL, et al. Use of expansion cohorts in phase I trials and probability of success in phase II for 381 anticancer drugs. *Clin Cancer Res*. 2017 Aug 1;23(15):4020–6.
23. Catillon M. Trends and predictors of biomedical research quality, 1990-2015: A meta-research study. *BMJ Open*. 2019 Sep 1;9:e030342.
24. Chang MJ, Qiu Y, Lipner SR. Race reporting and representation in onychomycosis clinical trials: A systematic review. *Mycoses*. 2021 Aug;64(8):954–66.
25. Chard JA, Tallon D, Dieppe PA. Epidemiology of research into interventions for the treatment of osteoarthritis of the knee joint. *Ann Rheum Dis*. 2000 Jun;59(6):414–8.
26. Chen Y-P, Liu X, Lv J-W, Li W-F, Zhang Y, Guo Y, et al. Publication status of contemporary oncology randomised controlled trials worldwide. *Eur J Cancer*. 2016 Oct;66:17–25.



27. Cherla DV, Viso CP, Holihan JL, Bernardi K, Moses ML, Mueck KM, et al. The effect of financial conflict of interest, disclosure status, and relevance on medical research from the united states. *J Gen Intern Med.* 2019 Mar;34(3):429–34.
28. Cho MK, Bero LA. The quality of drug studies published in symposium proceedings. *Ann Intern Med.* 1996 Mar 1;124(5):485–9.
29. Clark O, Adams JR, Bennett CL, Djulbegovic B. Erythropoietin, uncertainty principle and cancer related anaemia. *BMC Cancer.* 2002 Sep 24;2:23.
30. Clifford TJ, Barrowman NJ, Moher D. Funding source, trial outcome and reporting quality: are they related? Results of a pilot study. *BMC Health Serv Res.* 2002 Sep 4;2(1):18.
31. Corona G, Isidori AM, Buvat J, Aversa A, Rastrelli G, Hackett G, et al. Testosterone supplementation and sexual function: a meta-analysis study. *J Sex Med.* 2014 Jun;11(6):1577–92.
32. Corona G, Maseroli E, Rastrelli G, Isidori AM, Sforza A, Mannucci E, et al. Cardiovascular risk associated with testosterone-boosting medications: a systematic review and meta-analysis. *Expert Opin Drug Saf.* 2014 Oct;13(10):1327–51.
33. Cristea IA, Gentili C, Pietrini P, Cuijpers P. Is investigator background related to outcome in head to head trials of psychotherapy and pharmacotherapy for adult depression? A systematic review and meta-analysis. *PLoS One.* 2017;12(2):e0171654.
34. Crocetti MT, Amin DD, Scherer R. Assessment of risk of bias among pediatric randomized controlled trials. *Pediatrics.* 2010 Aug;126(2):298–305.
35. Vrljićak Davidović N, Komić L, Mešin I, Kotarac M, Okmažić D, Franić T. Registry versus publication: discrepancy of primary outcomes and possible outcome reporting bias in child and adolescent mental health. *Eur Child Adolesc Psychiatry.* 2021 Jan 18;
36. Davidson RA. Source of funding and outcome of clinical trials. *J Gen Intern Med.* 1986 Jun;1(3):155–8.
37. Davis JM, Chen N, Glick ID. Issues that may determine the outcome of antipsychotic trials: industry sponsorship and extrapyramidal side effect. *Neuropsychopharmacology.* 2008 Apr;33(5):971–5.
38. de Souza Gutierrez B, Aguiar PN, Dourado BB, Alves AL, Matsas S, Simões AR, et al. Evidence strength of pharmaceutical industry-funded clinical trials in metastatic nscl: a comparison with other sources of funding. *J Thorac Oncol.* 2020 Jul;15(7):1170–6.
39. DeFrance MJ, Yayac MF, Courtney PM, Squire MW. The impact of author financial conflicts on robotic-assisted joint arthroplasty research. *J Arthroplasty.* 2021 Apr;36(4):1462–9.
40. DeGeorge BR, Holland MC, Drake DB. The impact of conflict of interest in abdominal wall reconstruction with acellular dermal matrix. *Ann Plast Surg.* 2015 Feb;74(2):242–7.
41. Del Paggio JC, Azariah B, Sullivan R, Hopman WM, James FV, Roshni S, et al. Do contemporary randomized controlled trials meet ESMO thresholds for meaningful clinical benefit? *Ann Oncol.* 2017 Jan 1;28(1):157–62.
42. Falk Delgado A, Falk Delgado A. The association of funding source on effect size in randomized controlled trials: 2013-2015 - a cross-sectional survey and meta-analysis. *Trials.* 2017 Mar 14;18(1):125.
43. Falk Delgado A, Falk Delgado A. Outcome switching in randomized controlled oncology trials reporting on surrogate endpoints: a cross-sectional analysis. *Sci Rep.* 2017 Aug 23;7:9206.
44. DePasse JM, Park S, Eltorai AEM, Daniels AH. Factors predicting publication of spinal cord injury trials registered on www.ClinicalTrials.gov. *J Back Musculoskelet Rehabil.* 2018 Feb 6;31(1):45–8.
45. DeVito NJ, Bacon S, Goldacre B. Compliance with legal requirement to report clinical trial results on ClinicalTrials.gov: a cohort study. *Lancet.* 2020 Feb 1;395(10221):361–9.
46. Djulbegovic B, Lacevic M, Cantor A, Fields KK, Bennett CL, Adams JR, et al. The uncertainty principle and industry-sponsored research. *Lancet.* 2000 Aug 19;356(9230):635–8.
47. Djulbegovic B, Kumar A, Miladinovic B, Reljic T, Galeb S, Mhaskar A, et al. Treatment success in cancer: industry compared to publicly sponsored randomized controlled trials. *PLoS One.* 2013;8(3):e58711.
48. Etter J-F, Burri M, Stapleton J. The impact of pharmaceutical company funding on results of randomized trials of nicotine replacement therapy for smoking cessation: a meta-analysis. *Addiction.* 2007 May;102(5):815–22.

49. Finucane TE, Boulton CE. Association of funding and findings of pharmaceutical research at a meeting of a medical professional society. *Am J Med.* 2004 Dec 1;117(11):842–5.
50. Flacco ME, Manzoli L, Boccia S, Capasso L, Aleksovskaja K, Rosso A, et al. Head-to-head randomized trials are mostly industry sponsored and almost always favor the industry sponsor. *J Clin Epidemiol.* 2015 Jul;68(7):811–20.
51. Fraguas D, Díaz-Caneja CM, Pina-Camacho L, Umbricht D, Arango C. Predictors of placebo response in pharmacological clinical trials of negative symptoms in schizophrenia: a meta-regression analysis. *Schizophr Bull.* 2019 Jan 1;45(1):57–68.
52. Freemantle N, Anderson IM, Young P. Predictive value of pharmacological activity for the relative efficacy of antidepressant drugs. Meta-regression analysis. *Br J Psychiatry.* 2000 Oct;177:292–302.
53. Fung M, Yuan Y, Atkins H, Shi Q, Bubela T. Responsible translation of stem cell research: an assessment of clinical trial registration and publications. *Stem Cell Reports.* 2017 May 9;8(5):1190–201.
54. Gabler NB, Duan N, Ranases E, Suttner L, Ciarametaro M, Cooney E, et al. No improvement in the reporting of clinical trial subgroup effects in high-impact general medical journals. *Trials.* 2016 Jul 16;17(1):320.
55. Gan HK, You B, Pond GR, Chen EX. Assumptions of expected benefits in randomized phase III trials evaluating systemic treatments for cancer. *J Natl Cancer Inst.* 2012 Apr 18;104(8):590–8.
56. Gao Y, Ge L, Ma X, Shen X, Liu M, Tian J. Improvement needed in the network geometry and inconsistency of Cochrane network meta-analyses: a cross-sectional survey. *J Clin Epidemiol.* 2019 Sep;113:214–27.
57. Gartlehner G, Morgan L, Thieda P, Fleg A. The effect of study sponsorship on a systematically evaluated body of evidence of head-to-head trials was modest: secondary analysis of a systematic review. *J Clin Epidemiol.* 2010 Feb;63(2):117–25.
58. Gaudino M, Hameed I, Rahouma M, Khan FM, Tam DY, Biondi-Zoccai G, et al. Characteristics of contemporary randomized clinical trials and their association with the trial funding source in invasive cardiovascular interventions. *JAMA Intern Med.* 2020 Jul 1;180(7):993–1001.
59. González-González JG, Dorsey-Treviño EG, Alvarez-Villalobos N, Barrera-Flores FJ, Díaz González-Colmenero A, Quintanilla-Sánchez C, et al. Trustworthiness of randomized trials in endocrinology-A systematic survey. *PLoS One.* 2019;14(2):e0212360.
60. Grey P, Grey A, Bolland MJ. Outcomes, interventions and funding in randomised research published in high-impact journals. *Trials.* 2018 Oct 29;19(1):592.
61. Gyawali B, Tessema FA, Jung EH, Kesselheim AS. Assessing the justification, funding, success, and survival outcomes of randomized noninferiority trials of cancer drugs: a systematic review and pooled analysis. *JAMA Netw Open.* 2019 Aug 2;2(8):e199570.
62. Hajibandeh S, Hajibandeh S, Antoniou SA, Antoniou GA, Torella F. Industry sponsorship and positive outcome in vascular and endovascular randomised trials. *Vasa.* 2017 Jan;46(1):67–8.
63. Halpern SD, Barton TD, Gross R, Hennessy S, Berlin JA, Strom BL. Epidemiologic studies of adverse effects of anti-retroviral drugs: how well is statistical power reported. *Pharmacoepidemiol Drug Saf.* 2005 Mar;14(3):155–61.
64. Hanna E, Rémuzat C, Auquier P, Toumi M. Risk of discontinuation of Advanced Therapy Medicinal Products clinical trials. *J Mark Access Health Policy.* 2016;4.
65. Hashemipour MA, Pourmonajemzadeh S, Zoghitivana S, Navabi N. Relationship between declarations of conflict of interests and reporting positive outcomes in Iranian dental journals. *Sci Eng Ethics.* 2019 Aug;25(4):1057–67.
66. Hengartner MP, Amendola S, Kaminski JA, Kindler S, Bschor T, Plöderl M. Suicide risk with selective serotonin reuptake inhibitors and other new-generation antidepressants in adults: a systematic review and meta-analysis of observational studies. *J Epidemiol Community Health.* 2021 Mar 8;jech-2020-214611.
67. Heres S, Davis J, Maino K, Jetzinger E, Kissling W, Leucht S. Why olanzapine beats risperidone, risperidone beats quetiapine, and quetiapine beats olanzapine: an exploratory analysis of head-to-head comparison studies of second-generation antipsychotics. *Am J Psychiatry.* 2006 Feb;163(2):185–94.

68. Janiaud P, Cristea I-A, Ioannidis JPA. Industry-funded versus non-profit-funded critical care research: a meta-epidemiological overview. *Intensive Care Med*. 2018 Oct;44(10):1613–27.
69. Jefferson T, Di Pietrantonj C, Debalini MG, Rivetti A, Demicheli V. Relation of study quality, concordance, take home message, funding, and impact in studies of influenza vaccines: systematic review. *BMJ*. 2009 Feb 12;338:b354.
70. Jellison S, Roberts W, Bowers A, Combs T, Beaman J, Wayant C, et al. Evaluation of spin in abstracts of papers in psychiatry and psychology journals. *BMJ Evid Based Med*. 2019 Aug 5;178–81.
71. Jinapriya D, Anraku A, Alasbali T, Trope GE, Buys YM. Evaluation of investigator bias in industry-funded clinical trials of latanoprost. *Can J Ophthalmol*. 2011 Dec;46(6):531–6.
72. Johnson AL, Fladie I, Anderson JM, Lewis DM, Mons BR, Vassar M. Rates of discontinuation and nonpublication of head and neck cancer randomized clinical trials. *JAMA Otolaryngol Head Neck Surg*. 2020 Feb 1;146(2):176–82.
73. Jones R, Younie S, Macallister A, Thornton J. A comparison of the scientific quality of publicly and privately funded randomized controlled drug trials. *J Eval Clin Pract*. 2010 Dec;16(6):1322–5.
74. Kakkar AK, Padhy BM, Sarangi SC, Gupta YK. Methodological characteristics of clinical trials: impact of mandatory trial registration. *J Pharm Pharm Sci*. 2019;22(1):131–41.
75. Kapelios CJ, Naci H, Vardas PE, Mossialos E. Study design, result posting and publication of late-stage cardiovascular trials. *Eur Heart J Qual Care Clin Outcomes*. 2020 Oct 24;qcaa080.
76. Kelly R, Cohen L, Semple R, Bialer P, Lau A, Bodenheimer A, et al. Relationship between drug company funding and outcomes of clinical psychiatric research. *Psychological medicine*. 2006 Dec 1;36:1647–56.
77. Kemmeren JM, Algra A, Grobbee DE. Third generation oral contraceptives and risk of venous thrombosis: meta-analysis. *BMJ*. 2001 Jul 21;323(7305):131–4.
78. Khan NA, Lombeida JI, Singh M, Spencer HJ, Torralba KD. Association of industry funding with the outcome and quality of randomized controlled trials of drug therapy for rheumatoid arthritis. *Arthritis Rheum*. 2012 Jul;64(7):2059–67.
79. Killin LOJ, Russ TC, Starr JM, Abrahams S, Della Sala S. The effect of funding sources on donepezil randomised controlled trial outcome: a meta-analysis. *BMJ Open*. 2014 Apr 7;4(4):e004083.
80. Kjaergard LL, Als-Nielsen B. Association between competing interests and authors' conclusions: epidemiological study of randomised clinical trials published in the BMJ. *BMJ*. 2002 Aug 3;325(7358):249.
81. Lee KC, Wu BW, Chuang S-K. Which factors affect the completion and publication of dental implant trials? *J Oral Maxillofac Surg*. 2020 Oct;78(10):1726–35.
82. Lee Y-K, Chung CY, Koo K-H, Lee KM, Ji H-M, Park MS. Conflict of interest in the assessment of thromboprophylaxis after total joint arthroplasty: a systematic review. *J Bone Joint Surg Am*. 2012 Jan 4;94(1):27–33.
83. Leite ETT, Moraes FY, Marta GN, Taunk NK, Vieira MTL, Hanna SA, et al. Trial sponsorship and self-reported conflicts of interest in breast cancer radiation therapy: An analysis of prospective clinical trials. *Breast*. 2017 Jun;33:29–33.
84. Leucht S, Chaimani A, Mavridis D, Leucht C, Huhn M, Helfer B, et al. Disconnection of drug-response and placebo-response in acute-phase antipsychotic drug trials on schizophrenia? Meta-regression analysis. *Neuropsychopharmacology*. 2019 Oct;44(11):1955–66.
85. Leucht S, Leucht C, Huhn M, Chaimani A, Mavridis D, Helfer B, et al. Sixty years of placebo-controlled antipsychotic drug trials in acute schizophrenia: systematic review, bayesian meta-analysis, and meta-regression of efficacy predictors. *Am J Psychiatry*. 2017 Oct 1;174(10):927–42.
86. Liang F, Zhu J, Mo M, Zhou CM, Jia HX, Xie L, et al. Role of industry funders in oncology RCTs published in high-impact journals and its association with trial conclusions and time to publication. *Ann Oncol*. 2018 Oct 1;29(10):2129–34.
87. Liss H. Publication bias in the pulmonary/allergy literature: effect of pharmaceutical company sponsorship. *Isr Med Assoc J*. 2006 Jul;8(7):451–4.

- 1
  - 2
  - 3
  - 4
  - 5
  - 6
  - 7
  - 8
  - 9
  - 10
  - 11
  - 12
  - 13
  - 14
  - 15
  - 16
  - 17
  - 18
  - 19
  - 20
  - 21
  - 22
  - 23
  - 24
  - 25
  - 26
  - 27
  - 28
  - 29
  - 30
  - 31
  - 32
  - 33
  - 34
  - 35
  - 36
  - 37
  - 38
  - 39
  - 40
  - 41
  - 42
  - 43
  - 44
  - 45
  - 46
  - 47
  - 48
  - 49
  - 50
  - 51
  - 52
  - 53
  - 54
  - 55
  - 56
  - 57
  - 58
  - 59
  - 60
88. Liu X, Zhang Y, Tang L-L, Le QT, Chua MLK, Wee JTS, et al. Characteristics of radiotherapy trials compared with other oncological clinical trials in the past 10 years. *JAMA Oncol.* 2018 Aug 1;4(8):1073–9.
89. Lubowitz JH, Appleby D, Centeno JM, Woolf SK, Reid JB. The relationship between the outcome of studies of autologous chondrocyte implantation and the presence of commercial funding. *Am J Sports Med.* 2007 Nov;35(11):1809–16.
90. Lynch J, Cunningham M, Warne W, Schaad D, Wolf F, Leopold S. Commercially funded and united states-based research is more likely to be published; good-quality studies with negative outcomes are not. *The Journal of bone and joint surgery American volume.* 2007 Jun 1;89:1010–8.
91. Ma D, Zhang Z, Zhang X, Li L. Comparative efficacy, acceptability, and safety of medicinal, cognitive-behavioral therapy, and placebo treatments for acute major depressive disorder in children and adolescents: a multiple-treatments meta-analysis. *Curr Med Res Opin.* 2014 Jun;30(6):971–95.
92. Magnani CJ, Steinberg JR, Harmange CI, Zhang X, Driscoll C, Bell A, et al. Clinical trial outcomes in urology: assessing early discontinuation, results reporting and publication in clinicaltrials.gov registrations 2007-2019. *J Urol.* 2021 Apr;205(4):1159–68.
93. Maillet D, Blay JY, You B, Rachdi A, Gan HK, Péron J. The reporting of adverse events in oncology phase III trials: a comparison of the current status versus the expectations of the EORTC members. *Ann Oncol.* 2016 Jan;27(1):192–8.
94. Malek E, Saygin C, Ye R, Covut F, Kim B-G, Welge J, et al. Predicting successful phase advancement and regulatory approval in multiple myeloma from phase I overall response rates. *JCO Clin Cancer Inform.* 2017 Nov;1:1–14.
95. Mian MK, Sreedharan S, Limaye NS, Hogan C, Darvall JN. Research trends in anticoagulation therapy over the last 25 years. *Semin Thromb Hemost.* 2020 Nov;46(8):919–31.
96. Mitchell JM, Patterson JA. The Inclusion of Economic Endpoints as Outcomes in Clinical Trials Reported to ClinicalTrials.gov. *J Manag Care Spec Pharm.* 2020 Apr;26(4):386–93.
97. Momeni A, Becker A, Bannasch H, Antes G, Blümle A, Stark GB. Association between research sponsorship and study outcome in plastic surgery literature. *Ann Plast Surg.* 2009 Dec;63(6):661–4.
98. Moncrieff J. Clozapine v. conventional antipsychotic drugs for treatment-resistant schizophrenia: a re-examination. *Br J Psychiatry.* 2003 Aug;183:161–6.
99. Montgomery JH, Byerly M, Carmody T, Li B, Miller DR, Varghese F, et al. An analysis of the effect of funding source in randomized clinical trials of second generation antipsychotics for the treatment of schizophrenia. *Control Clin Trials.* 2004 Dec;25(6):598–612.
100. Moraes FY, Mendez LC, Taunk NK, Raman S, Suh JH, Souhami L, et al. Funding source, conflict of interest and positive conclusions in neuro-oncology clinical trials. *J Neurooncol.* 2018 Feb;136(3):585–93.
101. Mossman SA, Mills JA, Walkup JT, Strawn JR. The impact of failed antidepressant trials on outcomes in children and adolescents with anxiety and depression: a systematic review and meta-analysis. *J Child Adolesc Psychopharmacol.* 2021 May;31(4):259–67.
102. Naci H, Dias S, Ades AE. Industry sponsorship bias in research findings: a network meta-analysis of LDL cholesterol reduction in randomised trials of statins. *BMJ.* 2014 Oct 3;349:g5741.
103. Ng T, Mazzarello S, Wang Z, Hutton B, Dranitsaris G, Vandermeer L, et al. Choice of study endpoint significantly impacts the results of breast cancer trials evaluating chemotherapy-induced nausea and vomiting. *Breast Cancer Res Treat.* 2016 Jan;155(2):337–44.
104. Nieto A, Mazon A, Pamies R, Linana JJ, Lanuza A, Jiménez FO, et al. Adverse effects of inhaled corticosteroids in funded and nonfunded studies. *Arch Intern Med.* 2007 Oct 22;167(19):2047–53.
105. Nithianandan H, Kuriyan AE, Venincasa MJ, Sridhar J. Analysis of Funding Source and Spin in the Reporting of Studies of Intravitreal Corticosteroid Therapy for Diabetic Macular Edema: A Systematic Review. *Clin Ophthalmol.* 2020;14:2383–95.
106. Odutayo A, Emdin CA, Hsiao AJ, Shakir M, Copsey B, Dutton S, et al. Association between trial registration and positive study findings: cross sectional study (Epidemiological Study of Randomized Trials-ESORT). *BMJ.* 2017 Mar 14;356:j917.

107. Del Paggio JC, Berry JS, Hopman WM, Eisenhauer EA, Prasad V, Gyawali B, et al. Evolution of the Randomized Clinical Trial in the Era of Precision Oncology. *JAMA Oncol*. 2021 May 1;7(5):728–34.
108. Pasalic D, McGinnis GJ, Fuller CD, Grossberg AJ, Verma V, Mainwaring W, et al. Progression-free survival is a suboptimal predictor for overall survival among metastatic solid tumour clinical trials. *Eur J Cancer*. 2020 Sep;136:176–85.
109. Pengel LHM, Barcena L, Morris PJ. The quality of reporting of randomized controlled trials in solid organ transplantation. *Transpl Int*. 2009 Apr;22(4):377–84.
110. Pepper DJ, Sun J, Rhee C, Welsh J, Powers JH, Danner RL, et al. Procalcitonin-guided antibiotic discontinuation and mortality in critically ill adults. *Chest*. 2019 Jun;155(6):1109–18.
111. Peppercorn J, Blood E, Winer E, Partridge A. Association between pharmaceutical involvement and outcomes in breast cancer clinical trials. *Cancer*. 2007 Apr 1;109(7):1239–46.
112. Perlis CS, Harwood M, Perlis RH. Extent and impact of industry sponsorship conflicts of interest in dermatology research. *J Am Acad Dermatol*. 2005 Jun;52(6):967–71.
113. Perlis RH, Perlis CS, Wu Y, Hwang C, Joseph M, Nierenberg AA. Industry sponsorship and financial conflict of interest in the reporting of clinical trials in psychiatry. *Am J Psychiatry*. 2005 Oct;162(10):1957–60.
114. Popelut A, Valet F, Fromentin O, Thomas A, Bouchard P. Relationship between sponsorship and failure rate of dental implants: a systematic approach. *PLoS One*. 2010 Apr 21;5(4):e10274.
115. Pouwels XGLV, Ramaekers BLT, Joore MA. Reviewing the quality, health benefit and value for money of chemotherapy and targeted therapy for metastatic breast cancer. *Breast Cancer Res Treat*. 2017 Oct;165(3):485–98.
116. Prakash VS, Mansukhani NA, Helenowski IB, Woodruff TK, Kibbe MR. Sex bias in interventional clinical trials. *J Womens Health (Larchmt)*. 2018 Nov;27(11):1342–8.
117. Price-Haywood EG, Harden-Barrios J, Carr C, Reddy L, Bazzano LA, van Driel ML. Patient-reported outcomes in stroke clinical trials 2002-2016: a systematic review. *Qual Life Res*. 2019 May;28(5):1119–28.
118. Printz JO, Lee JJ, Knesek M, Urquhart AG. Conflict of interest in the assessment of hyaluronic acid injections for osteoarthritis of the knee: an updated systematic review. *J Arthroplasty*. 2013 Sep;28(8 Suppl):30-33.e1.
119. Probst P, Knebel P, Grummich K, Tenckhoff S, Ulrich A, Büchler MW, et al. Industry bias in randomized controlled trials in general and abdominal surgery: an empirical study. *Ann Surg*. 2016 Jul;264(1):87–92.
120. Punja S, Shamseer L, Hartling L, Urichuk L, Vandermeer B, Nikles J, et al. Amphetamines for attention deficit hyperactivity disorder (ADHD) in children and adolescents. *Cochrane Database Syst Rev*. 2016 Feb 4;2:CD009996.
121. Putman MS, Harrison Ragle A, Ruderman EM. The quality of randomized controlled trials in high-impact rheumatology journals, 1998-2018. *J Rheumatol*. 2020 Sep 1;47(9):1446–9.
122. Raman S, Moraes FY, Mendez LC, Taunk NK, Suh JH, Souhami L, et al. The relationship of study and authorship characteristics on trial sponsorship and self-reported conflicts of interest among neuro-oncology clinical trials. *J Neurooncol*. 2018 Aug;139(1):195–203.
123. Rasmussen N, Lee K, Bero L. Association of trial registration with the results and conclusions of published trials of new oncology drugs. *Trials*. 2009 Dec 16;10:116.
124. Rattinger G, Bero L. Factors associated with results and conclusions of trials of thiazolidinediones. *PLoS One*. 2009 Jun 8;4(6):e5826.
125. Reda S, Elhennawy K, Meyer-Lückel H, Paris S, Schwendicke F. Industry sponsorship in trials on fluoride varnish or gels for caries prevention. *Community Dent Oral Epidemiol*. 2017 Aug;45(4):289–95.
126. Rees CA, Pica N, Monuteaux MC, Bourgeois FT. Noncompletion and nonpublication of trials studying rare diseases: A cross-sectional analysis. *PLoS Med*. 2019 Nov 21;16(11):e1002966.
127. Ridker PM, Torres J. Reported outcomes in major cardiovascular clinical trials funded by for-profit and not-for-profit organizations: 2000-2005. *JAMA*. 2006 May 17;295(19):2270–4.

128. Rios LP, Oduyungbo A, Moitri MO, Rahman MO, Thabane L. Quality of reporting of randomized controlled trials in general endocrinology literature. *J Clin Endocrinol Metab.* 2008 Oct;93(10):3810–6.
129. Rochon PA, Gurwitz JH, Simms RW, Fortin PR, Felson DT, Minaker KL, et al. A study of manufacturer-supported trials of nonsteroidal anti-inflammatory drugs in the treatment of arthritis. *Arch Intern Med.* 1994 Jan 24;154(2):157–63.
130. Roddick AJ, Chan FTS, Stefaniak JD, Zheng SL. Discontinuation and non-publication of clinical trials in cardiovascular medicine. *Int J Cardiol.* 2017 Oct 1;244:309–15.
131. Roper N, Zhang N, Korenstein D. Industry collaboration and randomized clinical trial design and outcomes. *JAMA Intern Med.* 2014 Oct;174(10):1695–6.
132. Rösner S, Hackl-Herrwerth A, Leucht S, Lehert P, Vecchi S, Soyka M. Acamprosate for alcohol dependence. *Cochrane Database Syst Rev.* 2010 Sep 8;(9):CD004332.
133. Rösner S, Hackl-Herrwerth A, Leucht S, Vecchi S, Srisurapanont M, Soyka M. Opioid antagonists for alcohol dependence. *Cochrane Database Syst Rev.* 2010 Dec 8;(12):CD001867.
134. Saa C, Bunout D, Hirsch S. Industry funding effect on positive results of probiotic use in the management of acute diarrhea: a systematized review. *Eur J Gastroenterol Hepatol.* 2019 Mar;31(3):289–302.
135. Saleh RR, Meti N, Ribnikar D, Goldvaser H, Ocana A, Templeton AJ, et al. Associations between safety, tolerability, and toxicity and the reporting of health-related quality of life in phase III randomized trials in common solid tumors. *Cancer Med.* 2020 Nov;9(21):7888–95.
136. Sendyk DI, Rovai ES, Souza NV, Deboni MCZ, Pannuti CM. Selective outcome reporting in randomized clinical trials of dental implants. *J Clin Periodontol.* 2019 Jul;46(7):758–65.
137. Shepard S, Wise A, Johnson BS, Sajjadi NB, Hartwell M, Vassar M. Are randomized controlled trials in urology being conducted with justification? *J Osteopath Med.* 2021 May 21;121(8):665–71.
138. Silva MA, Duarte GS, Camara R, Rodrigues FB, Fernandes RM, Abreu D, et al. Placebo and nocebo responses in restless legs syndrome: A systematic review and meta-analysis. *Neurology.* 2017 Jun 6;88(23):2216–24.
139. Simonetti RG, Perricone G, Nikolova D, Bjelakovic G, Gluud C. Plasma expanders for people with cirrhosis and large ascites treated with abdominal paracentesis. *Cochrane Database Syst Rev.* 2019 Jun 28;6:CD004039.
140. Sinyor M, Schaffer A, Smart KA, Levitt AJ, Lanctôt KL, Grysman NH. Sponsorship, antidepressant dose, and outcome in major depressive disorder: meta-analysis of randomized controlled trials. *J Clin Psychiatry.* 2012 Feb;73(2):e277–287.
141. Son C, Tavakoli S, Bartanusz V. No publication bias in industry funded clinical trials of degenerative diseases of the spine. *J Clin Neurosci.* 2016 Mar;25:58–61.
142. Spanemberg L, Massuda R, Lovato L, Paim L, Vares EA, Sica da Rocha N, et al. Pharmacological treatment of bipolar depression: qualitative systematic review of double-blind randomized clinical trials. *Psychiatr Q.* 2012 Jun;83(2):161–75.
143. Sriganesh K, Bharadwaj S, Wang M, Abbade LPF, Jin Y, Philip M, et al. Quality of abstracts of randomized control trials in five top pain journals: A systematic survey. *Contemp Clin Trials Commun.* 2017 Sep;7:64–8.
144. Stefaniak JD, Lam TCH, Sim NE, Al-Shahi Salman R, Breen DP. Discontinuation and non-publication of neurodegenerative disease trials: a cross-sectional analysis. *Eur J Neurol.* 2017 Aug;24(8):1071–6.
145. Steffens ANV, Langerhuizen DWG, Doornberg JN, Ring D, Janssen SJ. Emotional tones in scientific writing: comparison of commercially funded studies and non-commercially funded orthopedic studies. *Acta Orthop.* 2021 Apr;92(2):240–3.
146. Sung KH, Chung CY, Lee KM, Lee Y-K, Lee SY, Lee J, et al. Conflict of interest in the assessment of botulinum toxin A injections in patients with cerebral palsy: a systematic review. *J Pediatr Orthop.* 2013 Aug;33(5):494–500.
147. Tibau A, Anguera G, Andrés-Pretel F, Templeton AJ, Seruga B, Barnadas A, et al. Role of cooperative groups and funding source in clinical trials supporting guidelines for systemic therapy of breast cancer. *Oncotarget.* 2018 Mar 13;9(19):15061–7.

148. Trinquart L, Dunn AG, Bourgeois FT. Registration of published randomized trials: a systematic review and meta-analysis. *BMC Med*. 2018 Oct 16;16(1):173.
149. Tulikangas PK, Ayers A, O'Sullivan DM. A meta-analysis comparing trials of antimuscarinic medications funded by industry or not. *BJU Int*. 2006 Aug;98(2):377–80.
150. Tungaraza T, Poole R. Influence of drug company authorship and sponsorship on drug trial outcomes. *Br J Psychiatry*. 2007 Jul;191:82–3.
151. Urrútia G, Ballesteros M, Djulbegovic B, Gich I, Roqué M, Bonfill X. Cancer randomized trials showed that dissemination bias is still a problem to be solved. *J Clin Epidemiol*. 2016 Sep;77:84–90.
152. van den Bogert CA, Souverein PC, Brekelmans CTM, Janssen SWJ, Koëter GH, Leufkens HGM, et al. Primary endpoint discrepancies were found in one in ten clinical drug trials. Results of an inception cohort study. *J Clin Epidemiol*. 2017 Sep;89:199–208.
153. van Heteren JAA, van Beurden I, Peters JPM, Smit AL, Stegeman I. Trial registration, publication rate and characteristics in the research field of otology: A cross-sectional study. *PLoS One*. 2019;14(7):e0219458.
154. van Lent M, Overbeke J, Out HJ. Role of editorial and peer review processes in publication bias: analysis of drug trials submitted to eight medical journals. *PLoS One*. 2014;9(8):e104846.
155. Venincasa MJ, Kuriyan AE, Sridhar J. Effect of funding source on reporting bias in studies of intravitreal anti-vascular endothelial growth factor therapy for retinal vein occlusion. *Acta Ophthalmol*. 2019 Mar;97(2):e296–302.
156. Vlad SC, LaValley MP, McAlindon TE, Felson DT. Glucosamine for pain in osteoarthritis: why do trial results differ? *Arthritis Rheum*. 2007 Jul;56(7):2267–77.
157. Walkup JT. Antidepressant efficacy for depression in children and adolescents: industry- and NIMH-funded studies. *Am J Psychiatry*. 2017 May 1;174(5):430–7.
158. Walter SD, Han H, Guyatt GH, Bassler D, Bhatnagar N, Gloy V, et al. A systematic survey of randomised trials that stopped early for reasons of futility. *BMC Med Res Methodol*. 2020 Jan 16;20(1):10.
159. Waqas A, Baig AA, Khalid MA, Aedma KK, Naveed S. Conflicts of interest and outcomes of clinical trials of antidepressants: an 18-year retrospective study. *J Psychiatr Res*. 2019 Sep;116:83–7.
160. Welsh J, Lu Y, Dhruva SS, Bikdeli B, Desai NR, Benchetrit L, et al. Age of data at the time of publication of contemporary clinical trials. *JAMA Netw Open*. 2018 Aug 3;1(4):e181065.
161. Wise A, Mannem D, Anderson JM, Weaver M, Hartwell M, Vassar M. Do author conflicts of interest and industry sponsorship influence outcomes of systematic reviews and meta-analyses regarding glaucoma interventions? a cross-sectional analysis. *J Glaucoma*. 2021 Apr 1;30(4):293–9.
162. Wong CH, Siah KW, Lo AW. Estimation of clinical trial success rates and related parameters. *Biostatistics*. 2019 Apr 1;20(2):273–86.
163. Wortzel JR, Turner BE, Weeks BT, Fragassi C, Ramos V, Truong T, et al. Trends in mental health clinical research: Characterizing the ClinicalTrials.gov registry from 2007-2018. *PLoS One*. 2020;15(6):e0233996.
164. Xu L, Freeman G, Cowling BJ, Schooling CM. Testosterone therapy and cardiovascular events among men: a systematic review and meta-analysis of placebo-controlled randomized trials. *BMC Med*. 2013 Apr 18;11:108.
165. Yilmaz T, Jutten RJ, Santos CY, Hernandez KA, Snyder PJ. Discontinuation and nonpublication of interventional clinical trials conducted in patients with mild cognitive impairment and Alzheimer's disease. *Alzheimers Dement (N Y)*. 2018;4:161–4.
166. Youssef MA, Abou-Setta AM, Lam WS. Recombinant versus urinary human chorionic gonadotrophin for final oocyte maturation triggering in IVF and ICSI cycles. *Cochrane Database Syst Rev*. 2016 Apr 23;4:CD003719.
167. Zhang J-P, Gallego JA, Robinson DG, Malhotra AK, Kane JM, Correll CU. Efficacy and safety of individual second-generation vs. first-generation antipsychotics in first-episode psychosis: a systematic review and meta-analysis. *Int J Neuropsychopharmacol*. 2013 Jul;16(6):1205–18.

## Preferred Reporting Items for Systematic reviews and Meta-Analyses extension for Scoping Reviews (PRISMA-ScR) Checklist

| SECTION                                               | ITEM | PRISMA-ScR CHECKLIST ITEM                                                                                                                                                                                                                                                                                  | REPORTED ON PAGE # |
|-------------------------------------------------------|------|------------------------------------------------------------------------------------------------------------------------------------------------------------------------------------------------------------------------------------------------------------------------------------------------------------|--------------------|
| <b>TITLE</b>                                          |      |                                                                                                                                                                                                                                                                                                            |                    |
| Title                                                 | 1    | Identify the report as a scoping review. (Methodological review)                                                                                                                                                                                                                                           | 1                  |
| <b>ABSTRACT</b>                                       |      |                                                                                                                                                                                                                                                                                                            |                    |
| Structured summary                                    | 2    | Provide a structured summary that includes (as applicable): background, objectives, eligibility criteria, sources of evidence, charting methods, results, and conclusions that relate to the review questions and objectives.                                                                              | 1-2                |
| <b>INTRODUCTION</b>                                   |      |                                                                                                                                                                                                                                                                                                            |                    |
| Rationale                                             | 3    | Describe the rationale for the review in the context of what is already known. Explain why the review questions/objectives lend themselves to a scoping review approach.                                                                                                                                   | 3-6                |
| Objectives                                            | 4    | Provide an explicit statement of the questions and objectives being addressed with reference to their key elements (e.g., population or participants, concepts, and context) or other relevant key elements used to conceptualize the review questions and/or objectives.                                  | 5-6                |
| <b>METHODS</b>                                        |      |                                                                                                                                                                                                                                                                                                            |                    |
| Protocol and registration                             | 5    | Indicate whether a review protocol exists; state if and where it can be accessed (e.g., a Web address); and if available, provide registration information, including the registration number.                                                                                                             | NA                 |
| Eligibility criteria                                  | 6    | Specify characteristics of the sources of evidence used as eligibility criteria (e.g., years considered, language, and publication status), and provide a rationale.                                                                                                                                       | 8                  |
| Information sources*                                  | 7    | Describe all information sources in the search (e.g., databases with dates of coverage and contact with authors to identify additional sources), as well as the date the most recent search was executed.                                                                                                  | 8                  |
| Search                                                | 8    | Present the full electronic search strategy for at least 1 database, including any limits used, such that it could be repeated.                                                                                                                                                                            | 8; supp            |
| Selection of sources of evidence†                     | 9    | State the process for selecting sources of evidence (i.e., screening and eligibility) included in the scoping review.                                                                                                                                                                                      | 8-9                |
| Data charting process‡                                | 10   | Describe the methods of charting data from the included sources of evidence (e.g., calibrated forms or forms that have been tested by the team before their use, and whether data charting was done independently or in duplicate) and any processes for obtaining and confirming data from investigators. | 9-10               |
| Data items                                            | 11   | List and define all variables for which data were sought and any assumptions and simplifications made.                                                                                                                                                                                                     | 9-10               |
| Critical appraisal of individual sources of evidence§ | 12   | If done, provide a rationale for conducting a critical appraisal of included sources of evidence; describe the methods used and how this information was used in any data synthesis (if appropriate).                                                                                                      | NA                 |

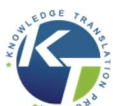



| SECTION                                       | ITEM | PRISMA-ScR CHECKLIST ITEM                                                                                                                                                                       | REPORTED ON PAGE # |
|-----------------------------------------------|------|-------------------------------------------------------------------------------------------------------------------------------------------------------------------------------------------------|--------------------|
| Synthesis of results                          | 13   | Describe the methods of handling and summarizing the data that were charted.                                                                                                                    | 9-10               |
| <b>RESULTS</b>                                |      |                                                                                                                                                                                                 |                    |
| Selection of sources of evidence              | 14   | Give numbers of sources of evidence screened, assessed for eligibility, and included in the review, with reasons for exclusions at each stage, ideally using a flow diagram.                    | 10                 |
| Characteristics of sources of evidence        | 15   | For each source of evidence, present characteristics for which data were charted and provide the citations.                                                                                     | 10-15; supp        |
| Critical appraisal within sources of evidence | 16   | If done, present data on critical appraisal of included sources of evidence (see item 12).                                                                                                      | NA                 |
| Results of individual sources of evidence     | 17   | For each included source of evidence, present the relevant data that were charted that relate to the review questions and objectives.                                                           | 10-15              |
| Synthesis of results                          | 18   | Summarize and/or present the charting results as they relate to the review questions and objectives.                                                                                            | 10-15              |
| <b>DISCUSSION</b>                             |      |                                                                                                                                                                                                 |                    |
| Summary of evidence                           | 19   | Summarize the main results (including an overview of concepts, themes, and types of evidence available), link to the review questions and objectives, and consider the relevance to key groups. | 15-19              |
| Limitations                                   | 20   | Discuss the limitations of the scoping review process.                                                                                                                                          | 17                 |
| Conclusions                                   | 21   | Provide a general interpretation of the results with respect to the review questions and objectives, as well as potential implications and/or next steps.                                       | 18-19              |
| <b>FUNDING</b>                                |      |                                                                                                                                                                                                 |                    |
| Funding                                       | 22   | Describe sources of funding for the included sources of evidence, as well as sources of funding for the scoping review. Describe the role of the funders of the scoping review.                 | 19                 |

JB1 = Joanna Briggs Institute; PRISMA-ScR = Preferred Reporting Items for Systematic reviews and Meta-Analyses extension for Scoping Reviews.

\* Where *sources of evidence* (see second footnote) are compiled from, such as bibliographic databases, social media platforms, and Web sites.

† A more inclusive/heterogeneous term used to account for the different types of evidence or data sources (e.g., quantitative and/or qualitative research, expert opinion, and policy documents) that may be eligible in a scoping review as opposed to only studies. This is not to be confused with *information sources* (see first footnote).

‡ The frameworks by Arksey and O'Malley (6) and Levac and colleagues (7) and the JBI guidance (4, 5) refer to the process of data extraction in a scoping review as data charting.

§ The process of systematically examining research evidence to assess its validity, results, and relevance before using it to inform a decision. This term is used for items 12 and 19 instead of "risk of bias" (which is more applicable to systematic reviews of interventions) to include and acknowledge the various sources of evidence that may be used in a scoping review (e.g., quantitative and/or qualitative research, expert opinion, and policy document).

From: Tricco AC, Lillie E, Zarin W, O'Brien KK, Colquhoun H, Levac D, et al. PRISMA Extension for Scoping Reviews (PRISMA-ScR): Checklist and Explanation. *Ann Intern Med.* 2018;169:467–473. doi: [10.7326/M18-0850](https://doi.org/10.7326/M18-0850).

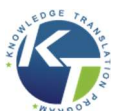

St. Michael's

Inspired Care.  
Inspiring Science.

For peer review only - <http://bmjopen.bmj.com/site/about/guidelines.xhtml>
