# Supplementary material for: Evidence for stratified conflicts of interest policies in research contexts: a methodological review
Source: PubMed Central journal article supplement — BMJ Open. 2022 Sep 19;12(9):e063501. doi: 10.1136/bmjopen-2022-063501 (PMC9486359; doi:10.1136/bmjopen-2022-063501), 2022-09-19
Supplement: bmjopen-2022-063501supp001.pdf [file bmjopen-2022-063501supp001.pdf]

## Search strategy

### MEDLINE via OvidSP (2015 – June 2021)

1. Drug Industry/
2. ((drug\$ or pharmaceutical or device\$ or for-profit or commercial\$) adj2 (industr\$ or company or companies or manufacturer\$ or organi#ation\$ or agency or agencies or source\$ or party or parties)).ti,ab.
3. private industr\$.ti,ab.
4. (industr\$ or nonindustr\$ or non-industr\$).ti,ab.
5. or/1-4
6. "Conflict of Interest"/
7. Financial Support/
8. Research Support as Topic/
9. (influenc\$ or funded or funding or sponsor\$ or support\$ or financ\$ or involvement).ti,ab.
10. competing interest\$.ti,ab.
11. or/6-10
12. and/5,11
13. Publication Bias/
14. "bias (epidemiology)"/
15. bias\$.ti,ab.
16. or/13-15
17. and/12,16
18. Treatment Outcome/
19. "Outcome Assessment (Health Care)"/
20. (outcome\$ or finding\$).ti,ab.
21. or/18-20
22. (favo?r\$ or positive or significan\$ or beneficial or benefit\$ or effective or effectual or efficacious).ti,ab.
23. (insignifican\$ or nonsignifican\$ or negative or adverse or ineffectiv\$ or ineffectual or unfavo?rabl\$ or detrimental).ti,ab.

24. or/22-23

25. and/21,24

26. and/12,25

27. ((favo?r\$ or positive or significan\$ or insignifican\$ or nonsignifican\$ or negative or unfavo?rabl\$ or detrimental) adj2 (event\$ or result\$ or outcome\$ or conclusion\$)).ti,ab.

28. and/12,27

29. or/17,26,28
